# Supplementary material for: Comparative proximity biotinylation implicates the small GTPase RAB18 in sterol mobilization and biosynthesis
Source: PubMed Central journal article supplement (PMC10641524; doi:10.1016/j.jbc.2023.105295), 2023-09-28
Supplement: mmc2.pdf [file mmc2.pdf]

# – single-peptide-identifications –

## List of Figures

|    |                                      |    |
|----|--------------------------------------|----|
| 1  | AHCY First experiment . . . . .      | 5  |
| 2  | AHCY Second experiment . . . . .     | 5  |
| 3  | AHCY Third experiment . . . . .      | 6  |
| 4  | ARHGDI2 Second experiment . . . . .  | 6  |
| 5  | ARHGDI2 Third experiment . . . . .   | 7  |
| 6  | ARHGDI2 Fourth experiment . . . . .  | 7  |
| 7  | ARHGDI2 Fifth experiment . . . . .   | 8  |
| 8  | ATL3 First experiment . . . . .      | 8  |
| 9  | ATL3 Second experiment . . . . .     | 9  |
| 10 | BABAM1 Second experiment . . . . .   | 9  |
| 11 | BABAM1 Third experiment . . . . .    | 10 |
| 12 | BET1L First experiment . . . . .     | 10 |
| 13 | BET1L Second experiment . . . . .    | 11 |
| 14 | BET1L Third experiment . . . . .     | 11 |
| 15 | c11orf49 First experiment . . . . .  | 12 |
| 16 | c11orf49 Second experiment . . . . . | 12 |
| 17 | c11orf49 Third experiment . . . . .  | 13 |
| 18 | CAPG Second experiment . . . . .     | 13 |
| 19 | CAPG Third experiment . . . . .      | 14 |
| 20 | CHP1 Second experiment . . . . .     | 14 |
| 21 | CHP1 Third experiment . . . . .      | 15 |
| 22 | COL16A1 Second experiment . . . . .  | 15 |
| 23 | COL16A1 Third experiment . . . . .   | 16 |
| 24 | CROCC First experiment . . . . .     | 16 |
| 25 | CROCC Third experiment . . . . .     | 17 |

|    |                                           |    |
|----|-------------------------------------------|----|
| 26 | CUL4B First experiment . . . . .          | 17 |
| 27 | CUL4B Third experiment . . . . .          | 18 |
| 28 | EI24 Second experiment . . . . .          | 18 |
| 29 | EI24 Third experiment . . . . .           | 19 |
| 30 | ELOVL5 First experiment . . . . .         | 19 |
| 31 | ELOVL5 Second experiment . . . . .        | 20 |
| 32 | ELOVL5 Third experiment . . . . .         | 20 |
| 33 | FAM101B First experiment . . . . .        | 21 |
| 34 | FAM101B Second experiment . . . . .       | 21 |
| 35 | FAM134B First experiment . . . . .        | 22 |
| 36 | FAM134B Second experiment . . . . .       | 22 |
| 37 | FAM134B Third experiment . . . . .        | 23 |
| 38 | GBA2 First experiment . . . . .           | 23 |
| 39 | GBA2 Second experiment . . . . .          | 24 |
| 40 | GBA2 Third experiment . . . . .           | 24 |
| 41 | GPR180 First experiment . . . . .         | 25 |
| 42 | GPR180 Second experiment . . . . .        | 25 |
| 43 | GPR180 Third experiment . . . . .         | 26 |
| 44 | GPR89B;GPR89A First experiment . . . . .  | 26 |
| 45 | GPR89B;GPR89A Second experiment . . . . . | 27 |
| 46 | GPR89B;GPR89A Third experiment . . . . .  | 27 |
| 47 | HSPA4 Second experiment . . . . .         | 28 |
| 48 | HSPA4 Third experiment . . . . .          | 28 |
| 49 | ITGB6 First experiment . . . . .          | 29 |
| 50 | ITGB6 Second experiment . . . . .         | 29 |
| 51 | ITGB6 Third experiment . . . . .          | 30 |
| 52 | JAGN1 Second experiment . . . . .         | 30 |
| 53 | JAGN1 Third experiment . . . . .          | 31 |
| 54 | MOB3B First experiment . . . . .          | 31 |

|    |                                         |    |
|----|-----------------------------------------|----|
| 55 | MOB3B Second experiment . . . . .       | 32 |
| 56 | MOB3B Third experiment . . . . .        | 32 |
| 57 | MPZL1 First experiment . . . . .        | 33 |
| 58 | MPZL1 Second experiment . . . . .       | 33 |
| 59 | MPZL1 Third experiment . . . . .        | 34 |
| 60 | OSBPL2 First experiment . . . . .       | 34 |
| 61 | OSBPL2 Second experiment . . . . .      | 35 |
| 62 | OSBPL2 Third experiment . . . . .       | 35 |
| 63 | PEX11B First experiment . . . . .       | 36 |
| 64 | PEX11B Second experiment . . . . .      | 36 |
| 65 | PEX11B Third experiment . . . . .       | 37 |
| 66 | PLEKHA1 First experiment . . . . .      | 37 |
| 67 | PLEKHA1 Second experiment . . . . .     | 38 |
| 68 | PLEKHA1 Third experiment . . . . .      | 38 |
| 69 | PRAF2 First experiment . . . . .        | 39 |
| 70 | PRAF2 Second experiment . . . . .       | 39 |
| 71 | PRAF2 Third experiment . . . . .        | 40 |
| 72 | PRR14L First experiment . . . . .       | 40 |
| 73 | PRR14L First experiment . . . . .       | 41 |
| 74 | RAB13 Second experiment . . . . .       | 41 |
| 75 | RAB13 Third experiment . . . . .        | 42 |
| 76 | RAB27A Second experiment . . . . .      | 42 |
| 77 | RAB27A Third experiment . . . . .       | 43 |
| 78 | RAP1A;RAP1B Second experiment . . . . . | 43 |
| 79 | RAP1A;RAP1B Third experiment . . . . .  | 44 |
| 80 | RER1 Second experiment . . . . .        | 44 |
| 81 | RER1 Third experiment . . . . .         | 45 |
| 82 | RGPD3;RGPD4 Second experiment . . . . . | 45 |
| 83 | RGPD3;RGPD4 Third experiment . . . . .  | 46 |

|     |                                      |    |
|-----|--------------------------------------|----|
| 84  | SLC39A7 First experiment . . . . .   | 46 |
| 85  | SLC39A7 Second experiment . . . . .  | 47 |
| 86  | SLC39A7 Third experiment . . . . .   | 47 |
| 87  | SNX9 First experiment . . . . .      | 48 |
| 88  | SNX9 Third experiment . . . . .      | 48 |
| 89  | SPCS1 First experiment . . . . .     | 49 |
| 90  | SPCS1 Second experiment . . . . .    | 49 |
| 91  | SPCS1 Third experiment . . . . .     | 50 |
| 92  | TLCD1 First experiment . . . . .     | 50 |
| 93  | TLCD1 Third experiment . . . . .     | 51 |
| 94  | TMEM115 First experiment . . . . .   | 51 |
| 95  | TMEM115 Second experiment . . . . .  | 52 |
| 96  | TMEM115 Third experiment . . . . .   | 52 |
| 97  | TMEM161A Second experiment . . . . . | 53 |
| 98  | TMEM161A Third experiment . . . . .  | 53 |
| 99  | TMEM245 Second experiment . . . . .  | 54 |
| 100 | TMEM245 Third experiment . . . . .   | 54 |
| 101 | TNPO1 First experiment . . . . .     | 55 |
| 102 | TNPO1 Second experiment . . . . .    | 55 |
| 103 | TNPO1 Third experiment . . . . .     | 56 |
| 104 | VAT1 Second experiment . . . . .     | 56 |
| 105 | VAT1 Third experiment . . . . .      | 57 |

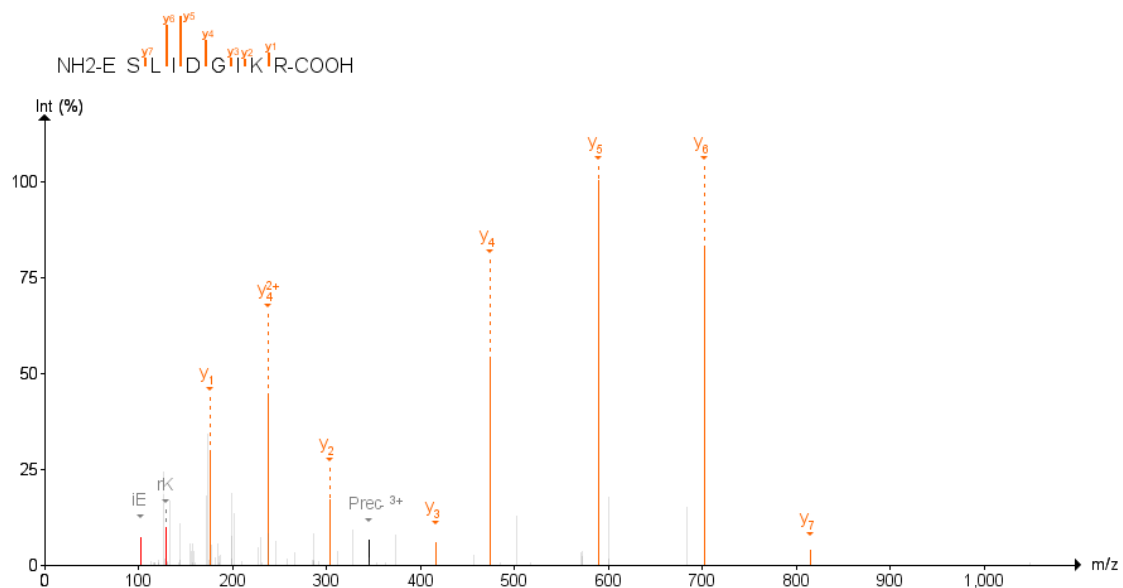

Figure 1: AHCY First experiment

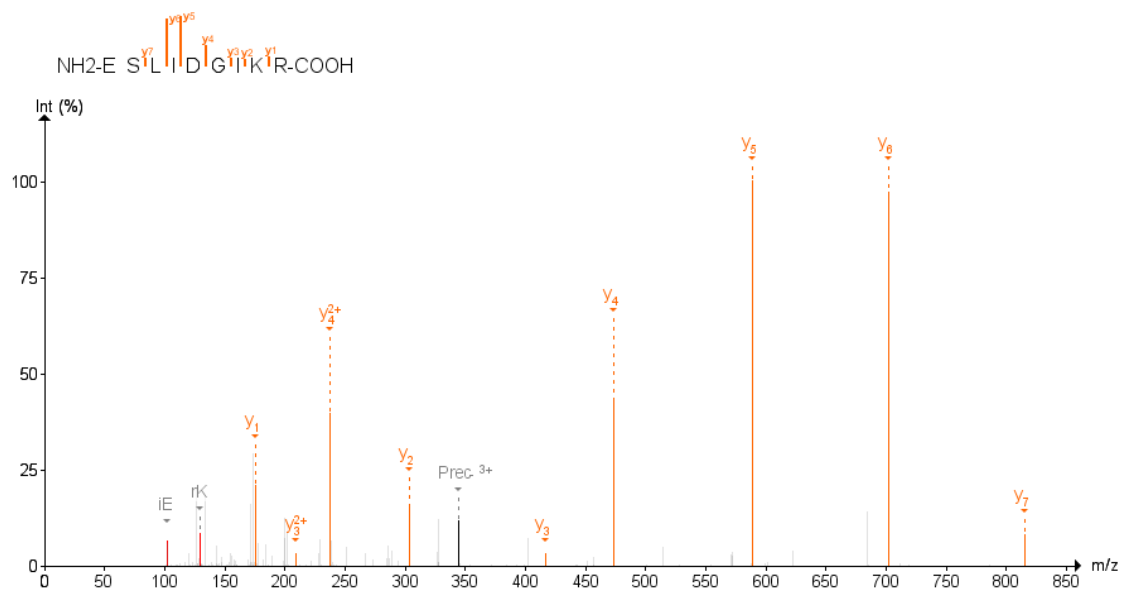

Figure 2: AHCY Second experiment

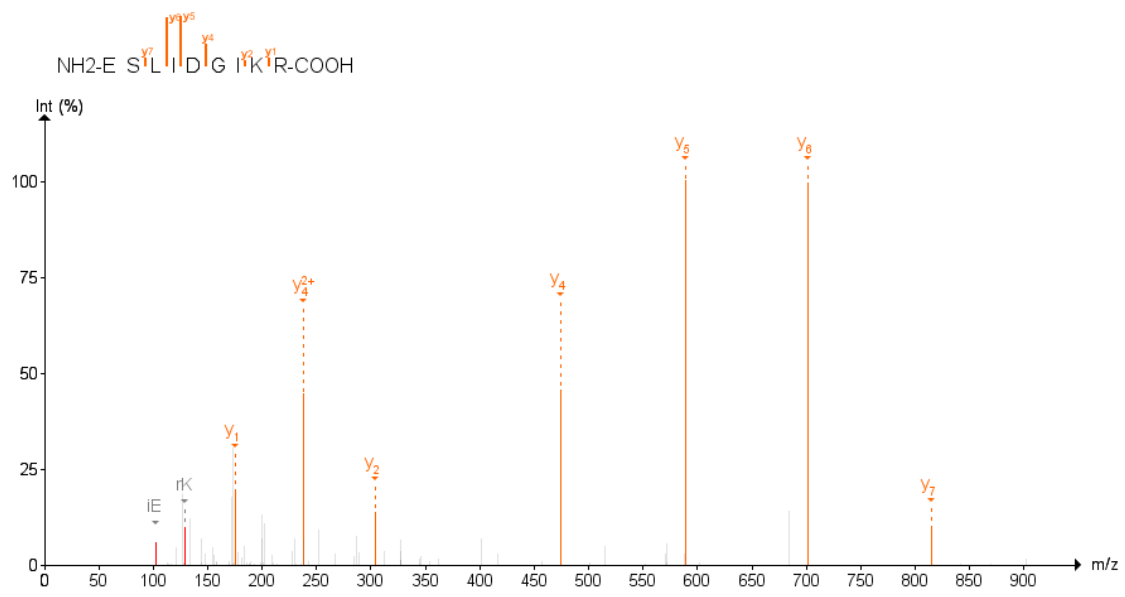

Figure 3: AH CY Third experiment

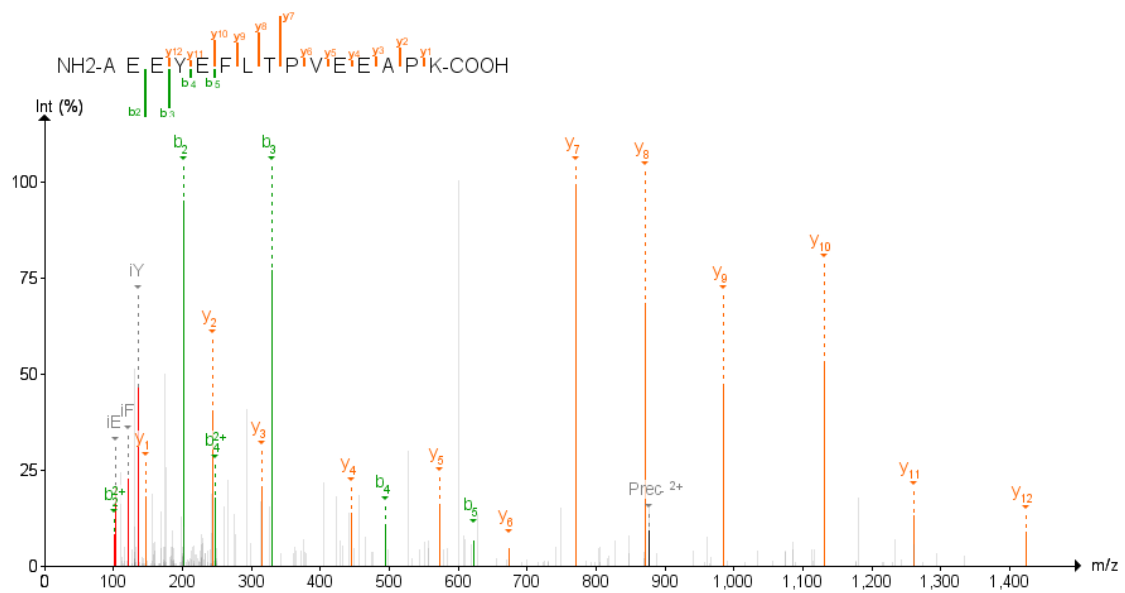

Figure 4: ARHG DIA Second experiment

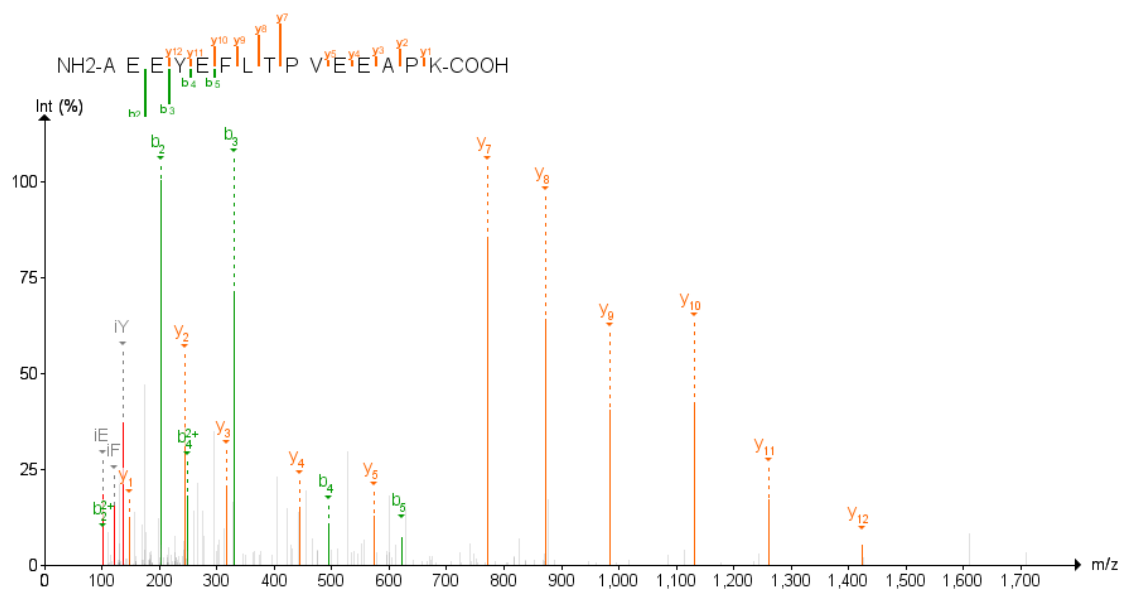

Figure 5: ARHGDI3 Third experiment

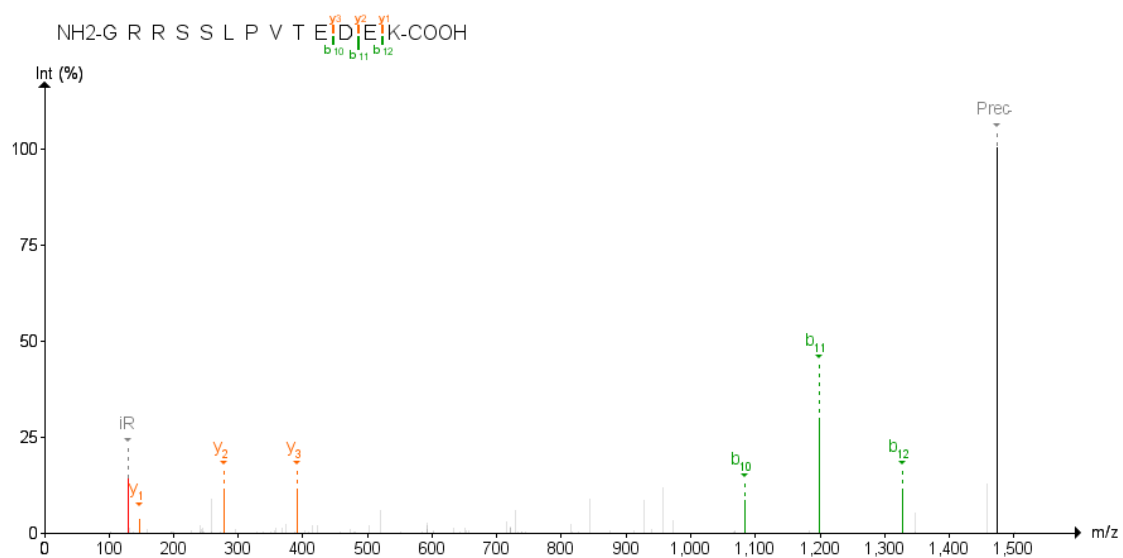

Figure 6: ARID4A Second experiment

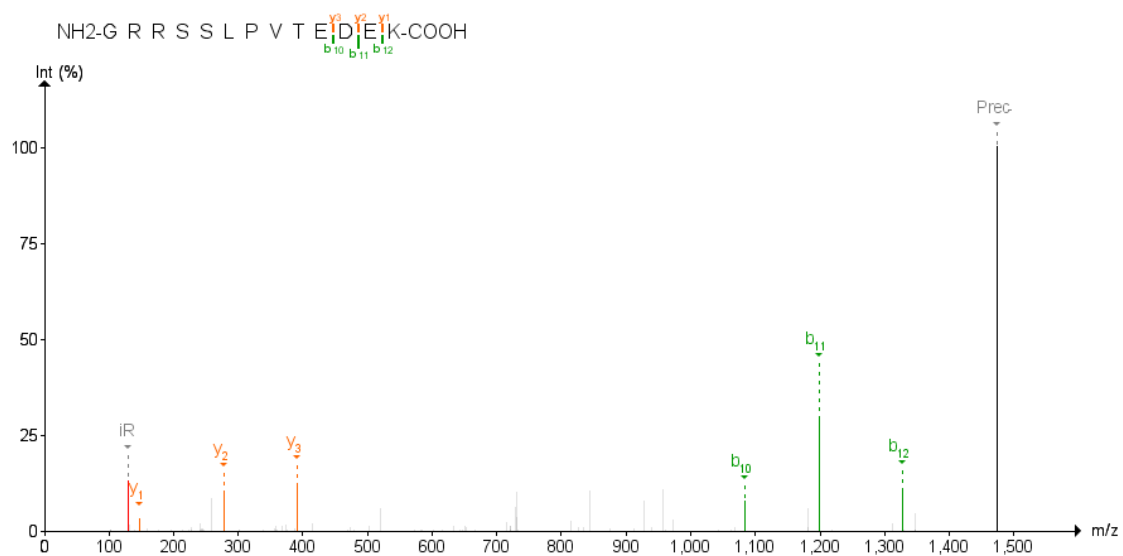

Figure 7: ARID4A Third experiment

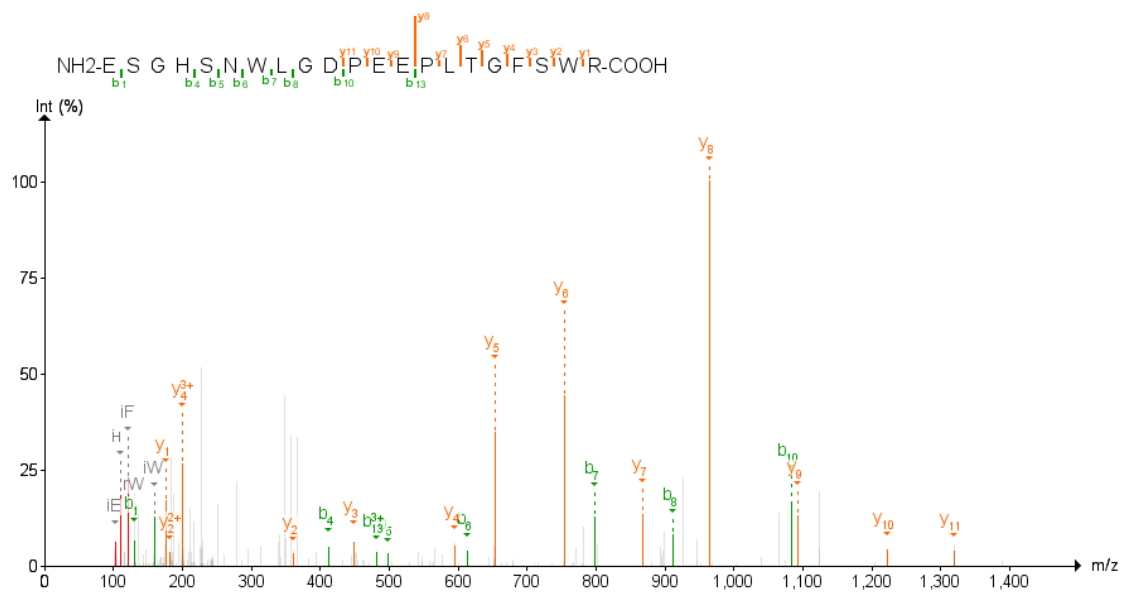

Figure 8: ATL3 First experiment



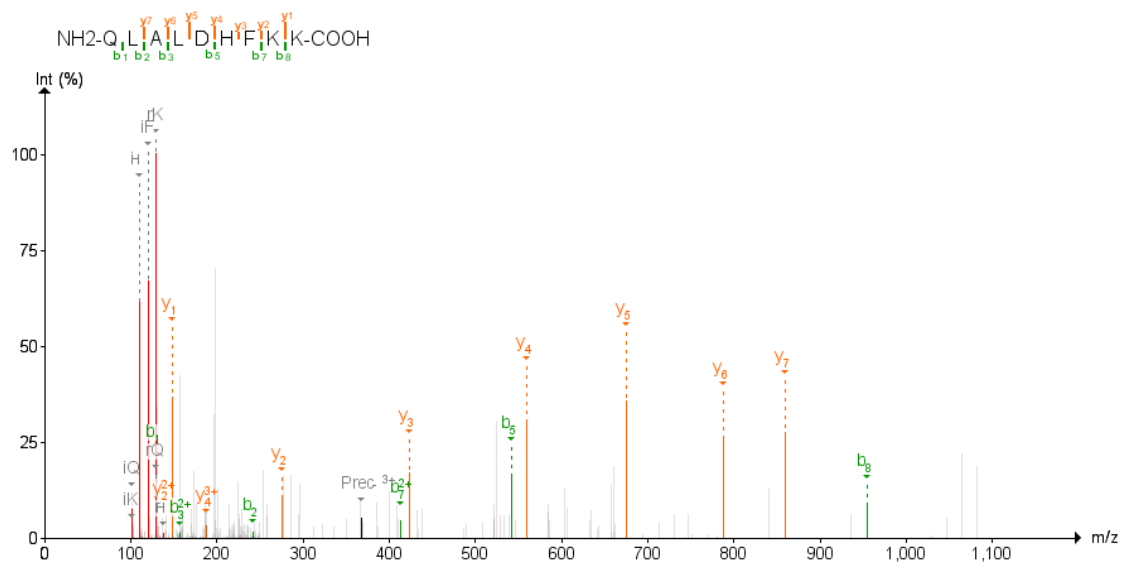

Figure 9: ATL3 Second experiment

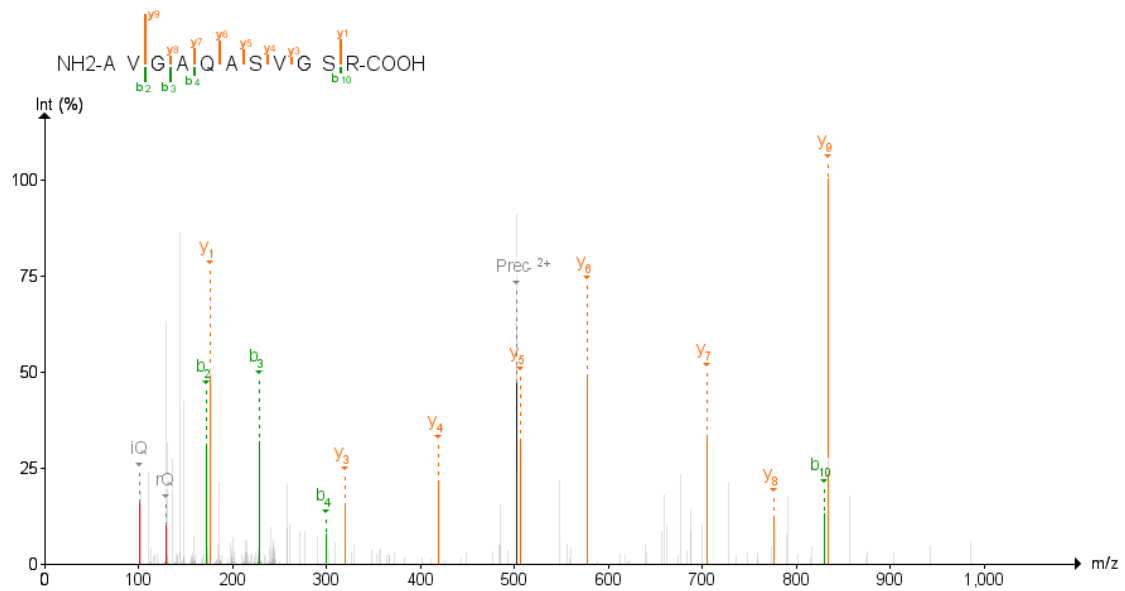

Figure 10: BABAM1 Second experiment

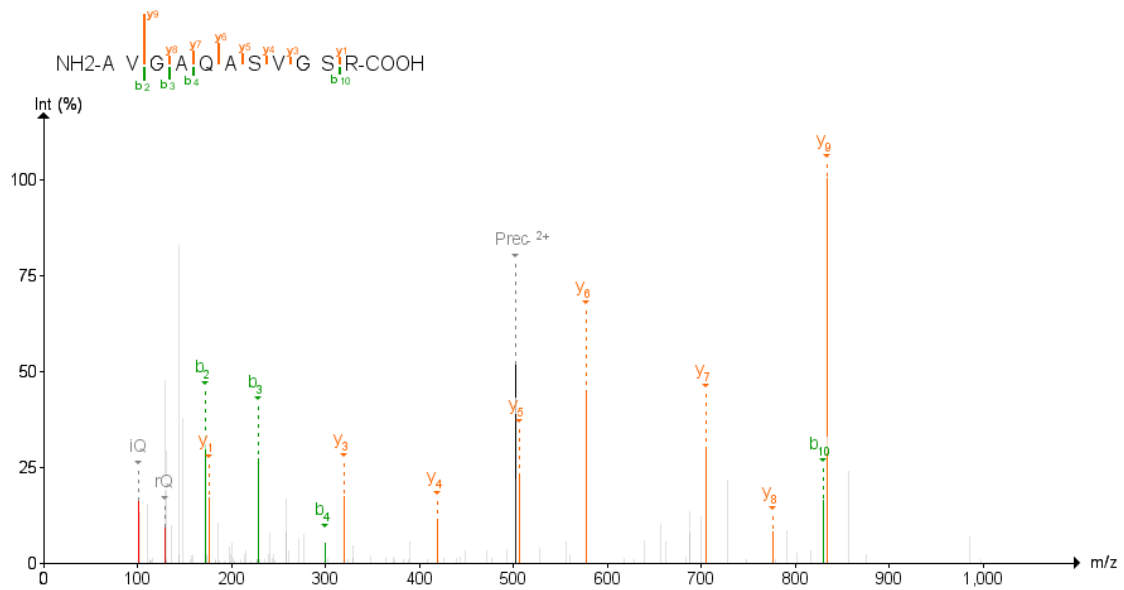

Figure 11: BABAM1 Third experiment

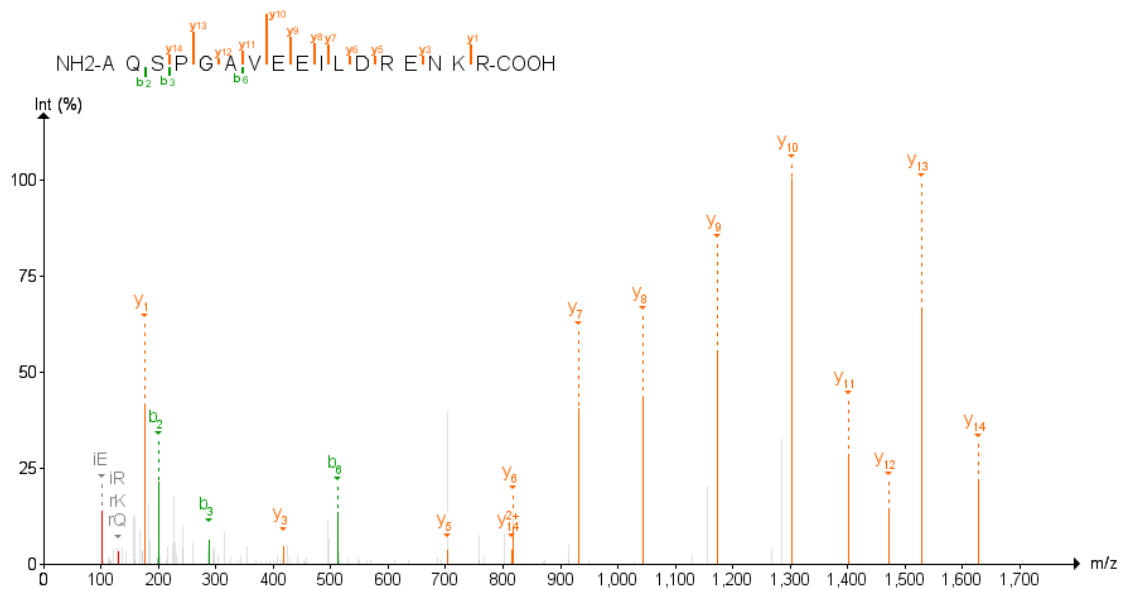

Figure 12: BET1L First experiment

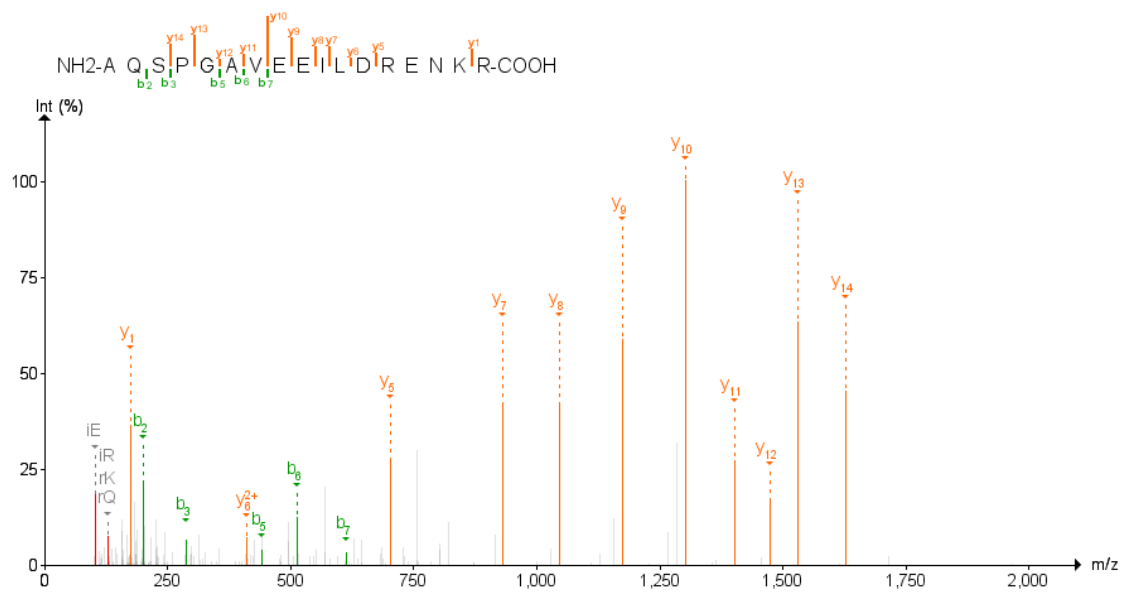

Figure 13: BET1L Second experiment

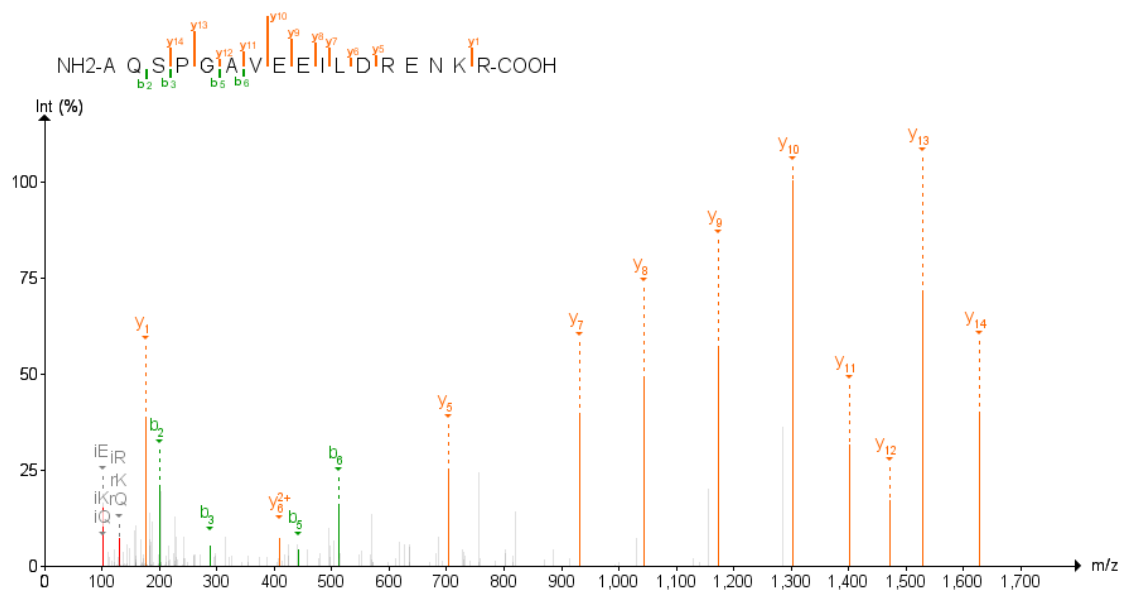

Figure 14: BET1L Third experiment

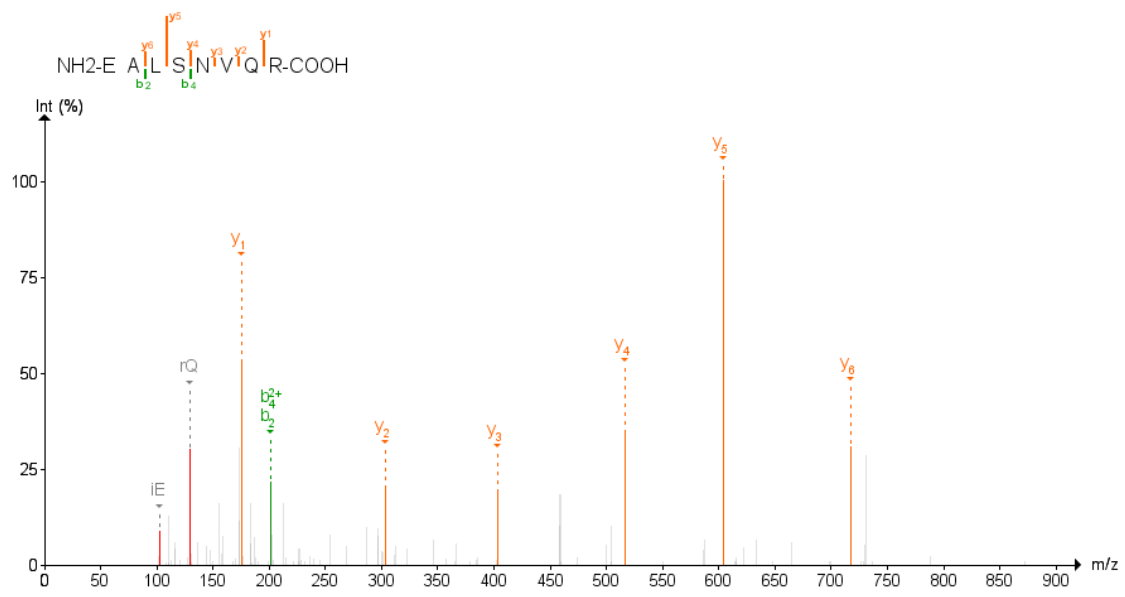

Figure 15: c11orf49 First experiment

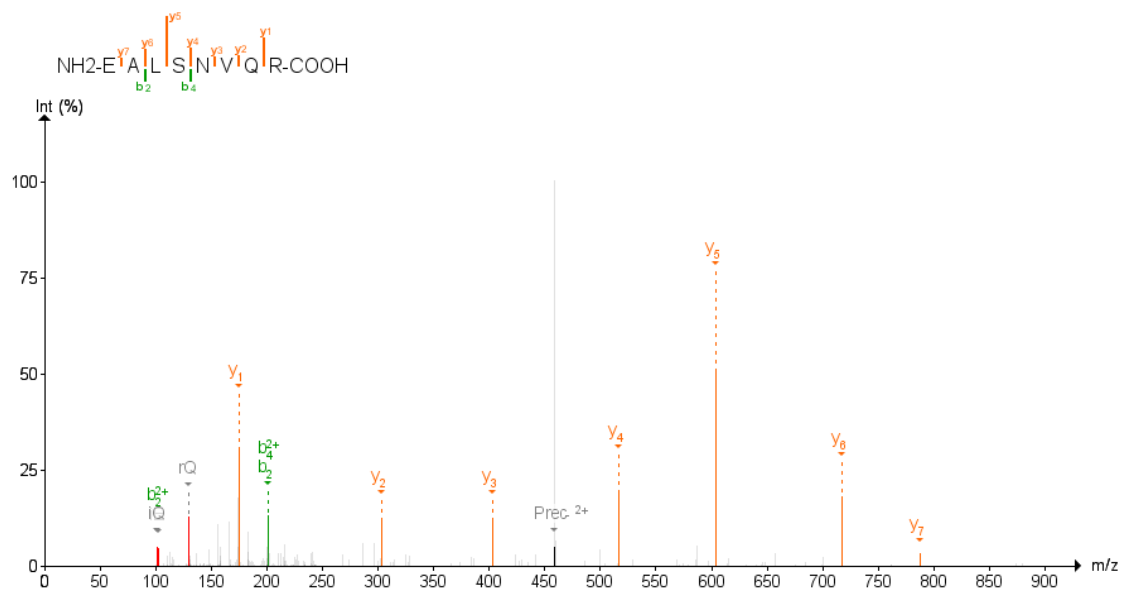

Figure 16: c11orf49 Second experiment

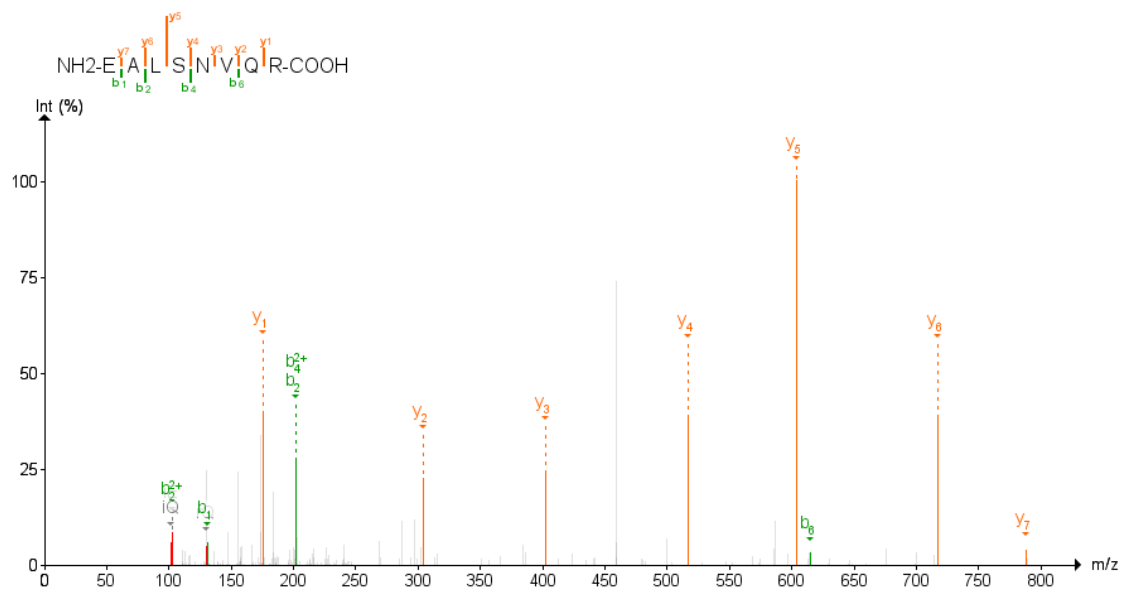

Figure 17: c11orf49 Third experiment

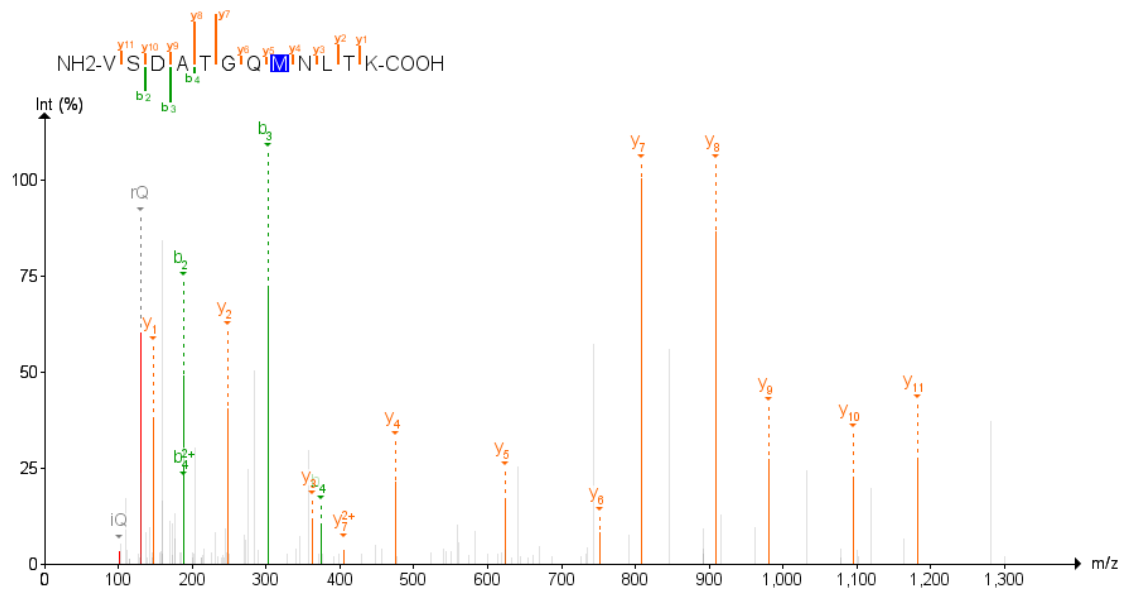

Figure 18: CAPG Second experiment

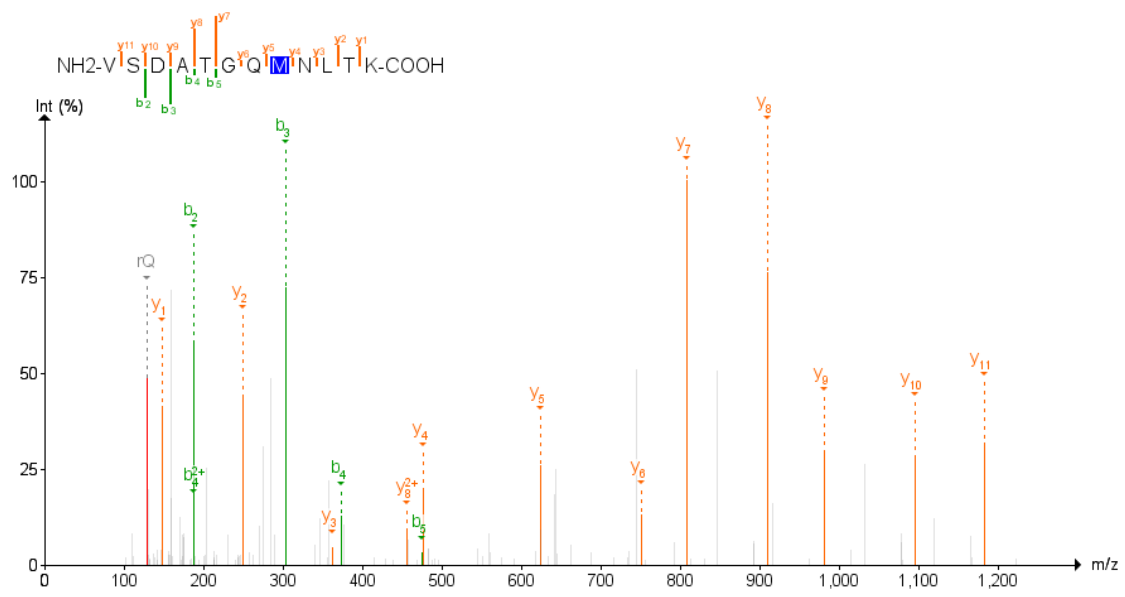

Figure 19: CAPG Third experiment

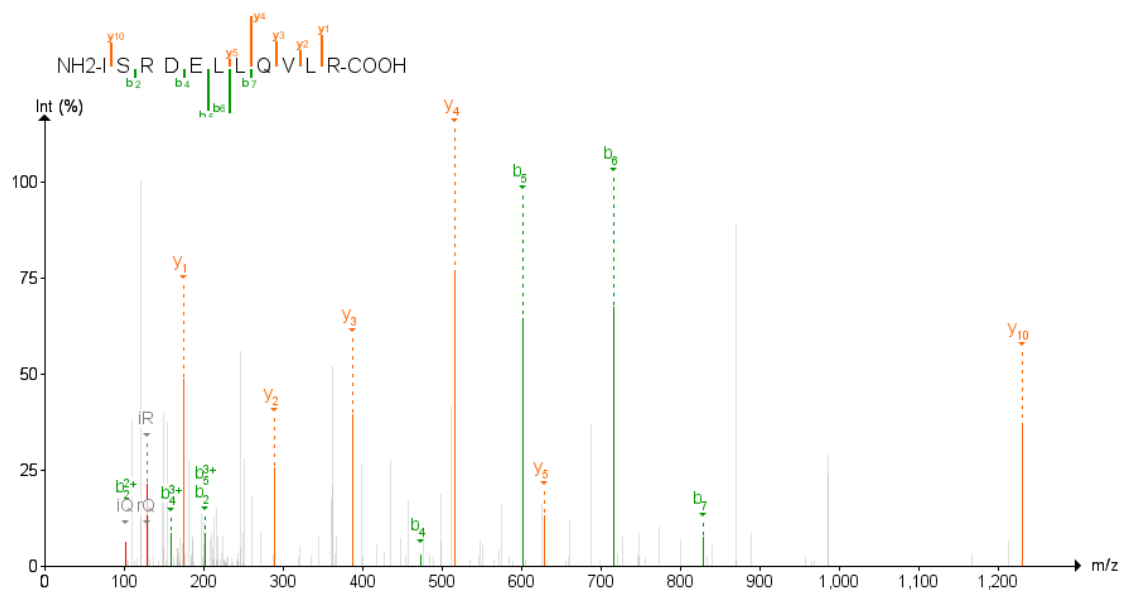

Figure 20: CHP1 Second experiment

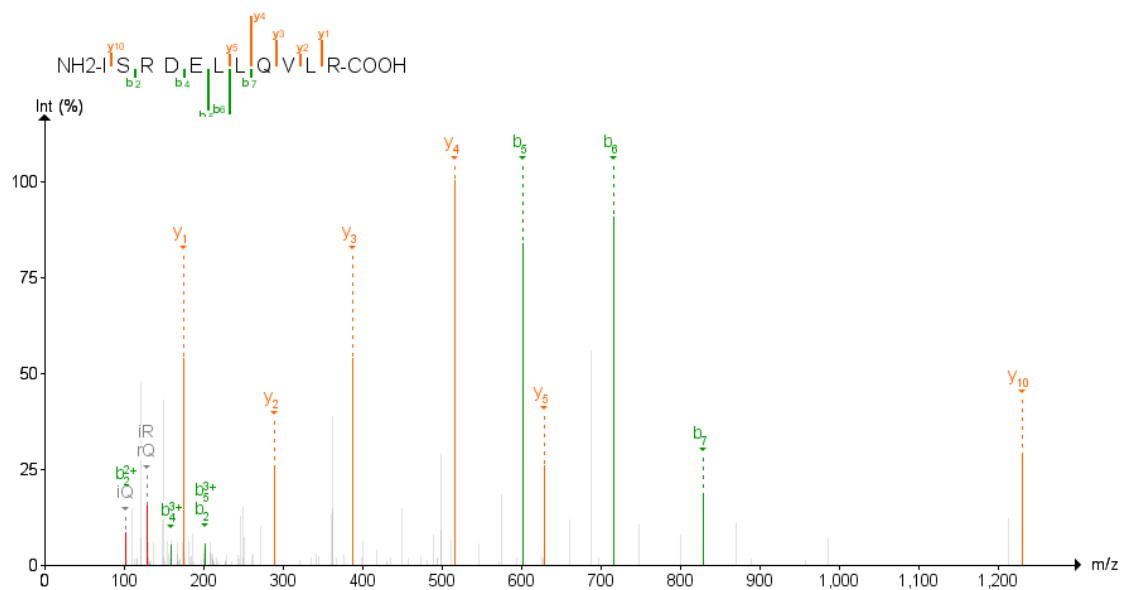

Figure 21: CHP1 Third experiment

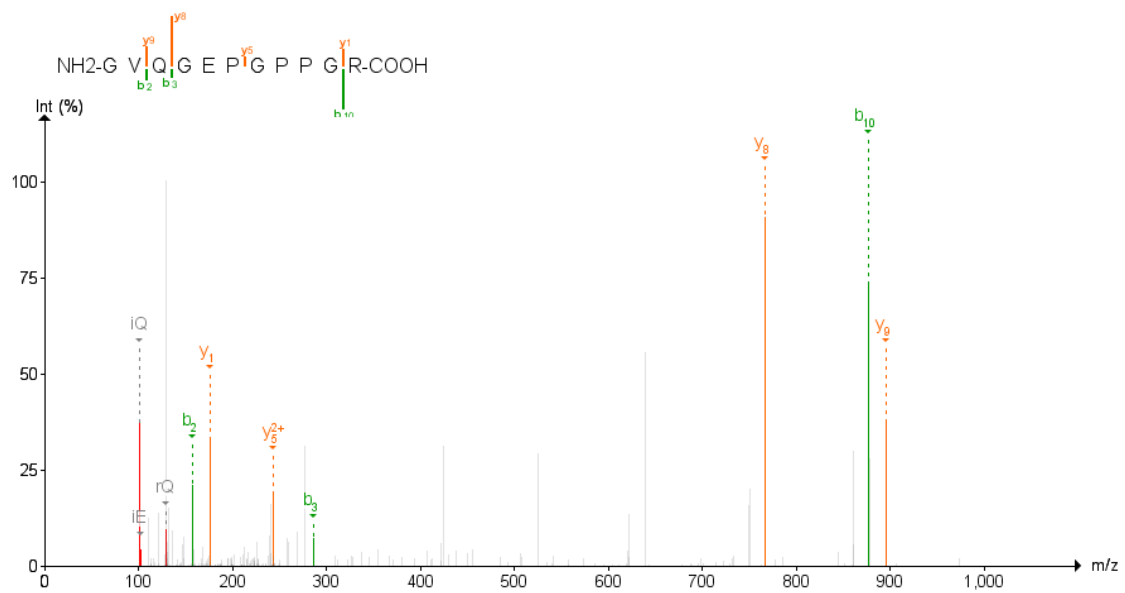

Figure 22: COL16A1 Second experiment

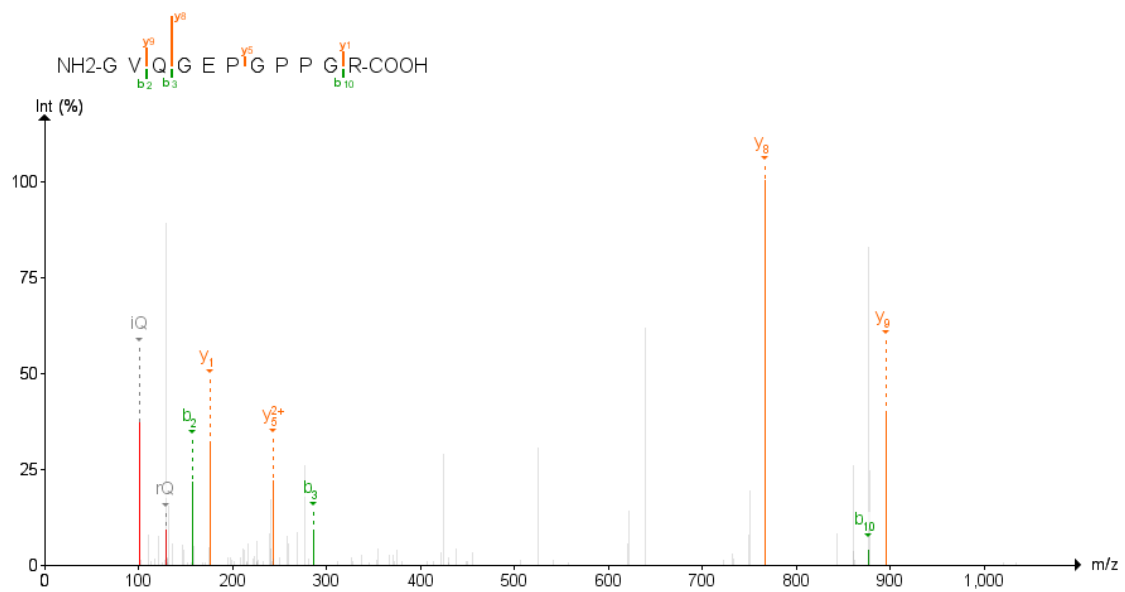

Figure 23: COL16A1 Third experiment

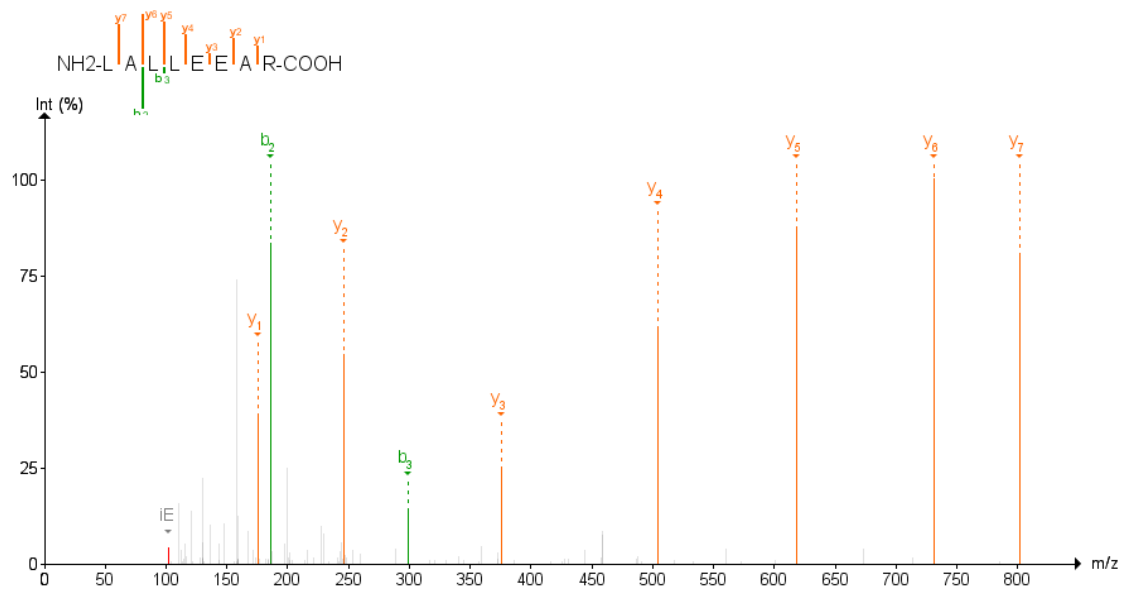

Figure 24: CROCC First experiment



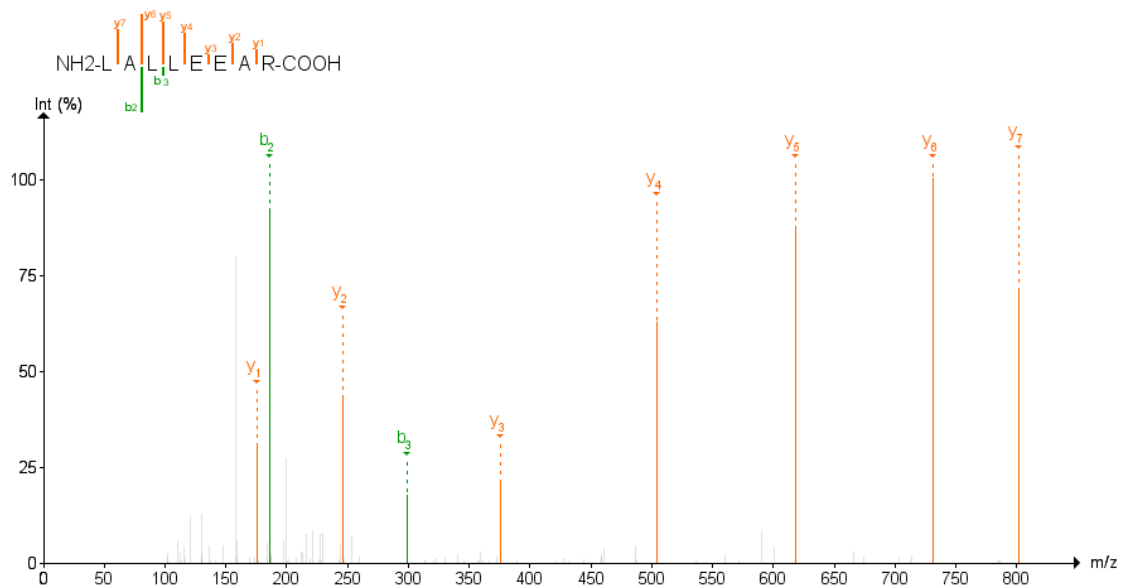

Figure 25: CROCC Third experiment

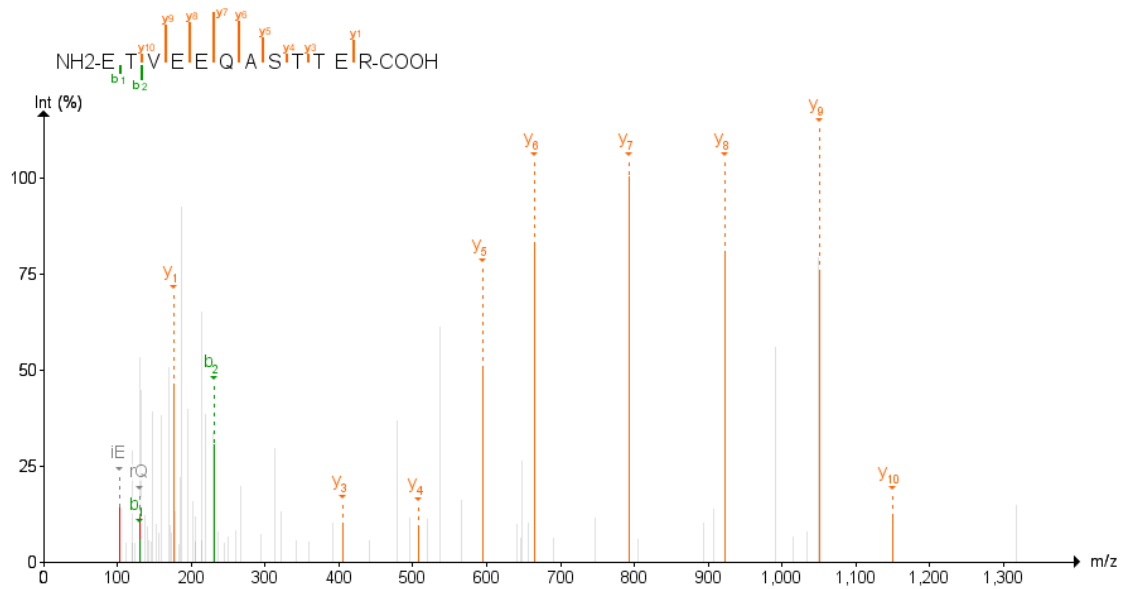

Figure 26: CUL4B First experiment

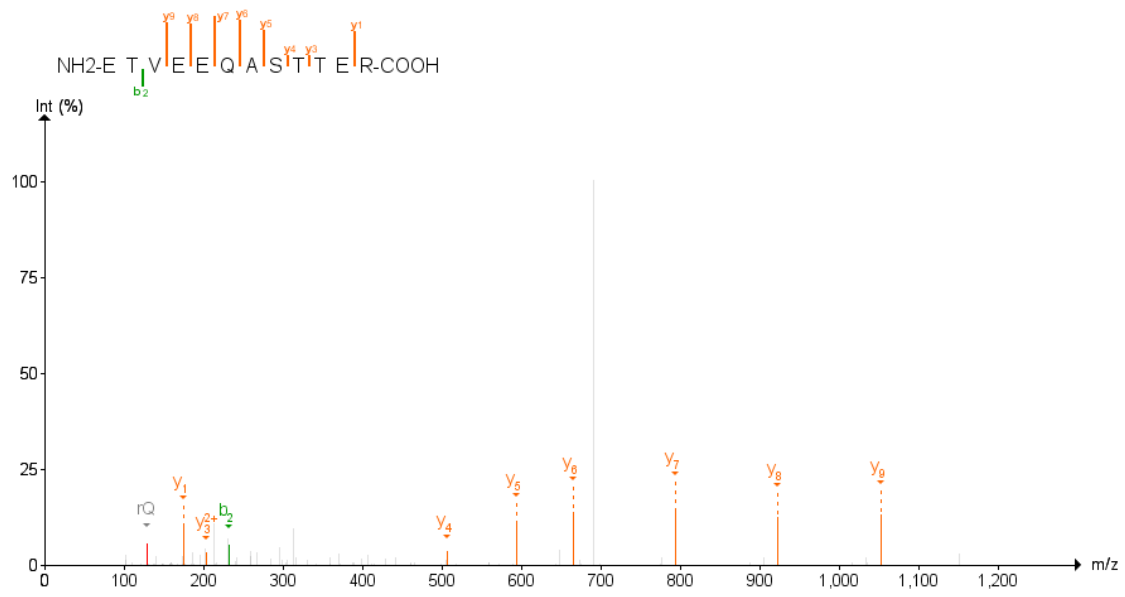

Figure 27: CUL4B Third experiment

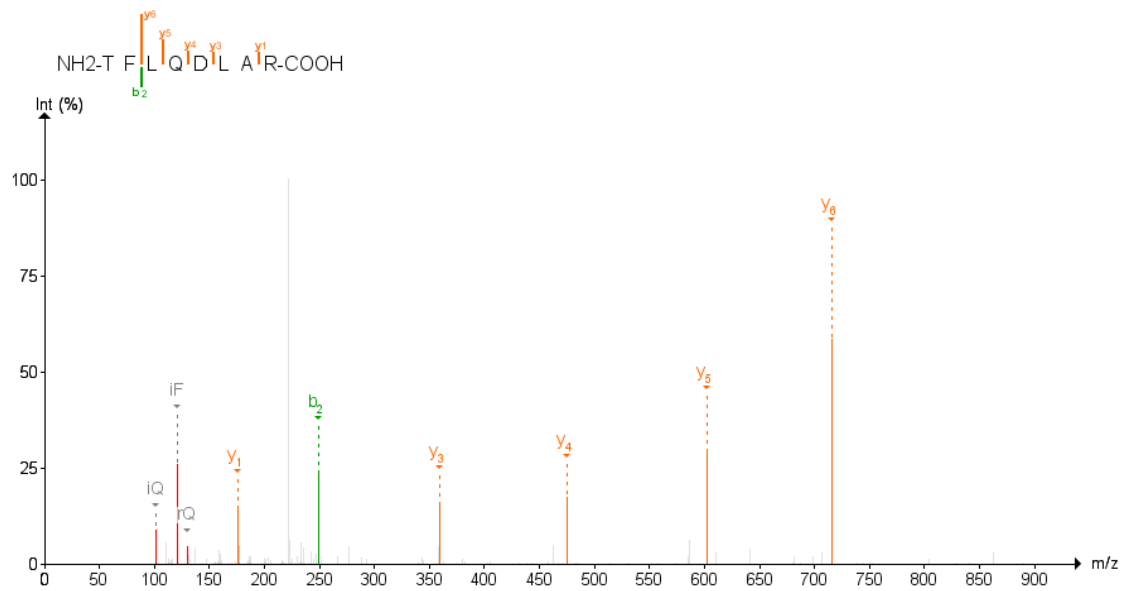

Figure 28: EI24 Second experiment

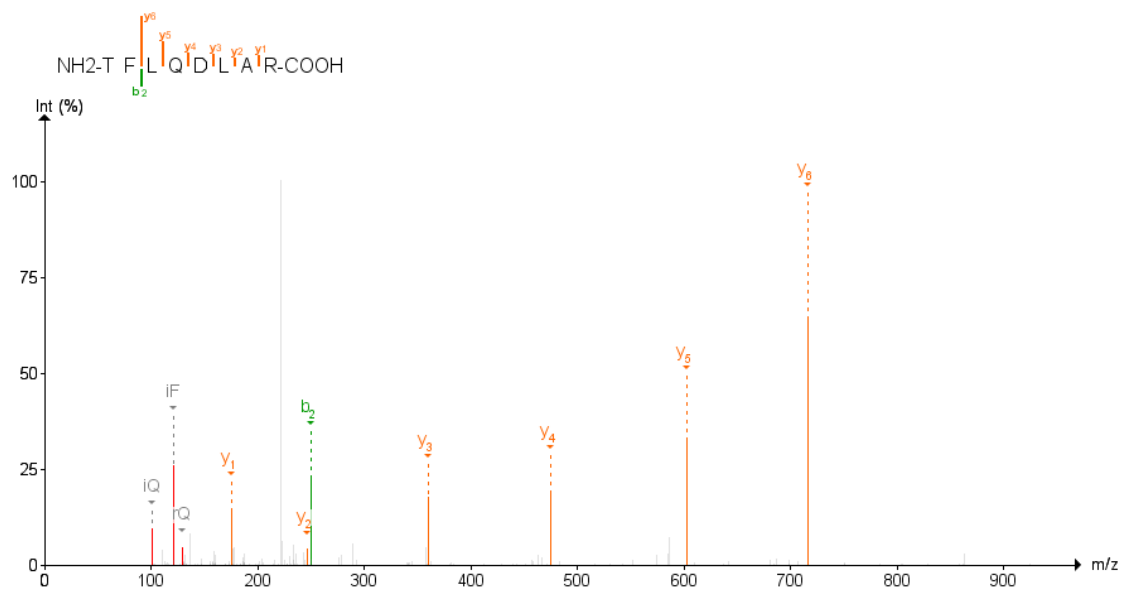

Figure 29: EI24 Third experiment

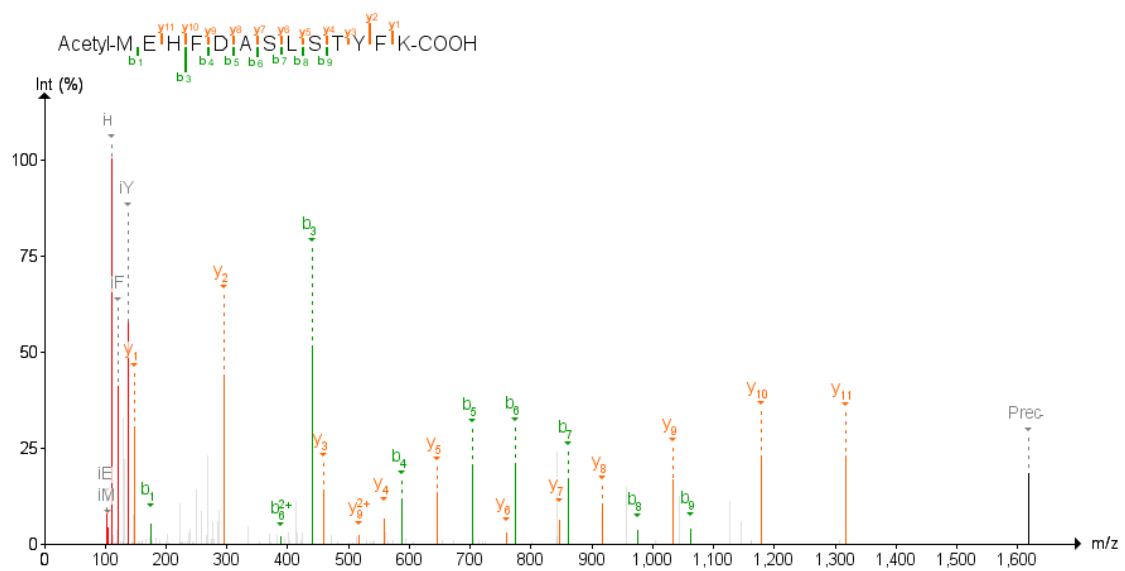

Figure 30: ELOVL5 First experiment

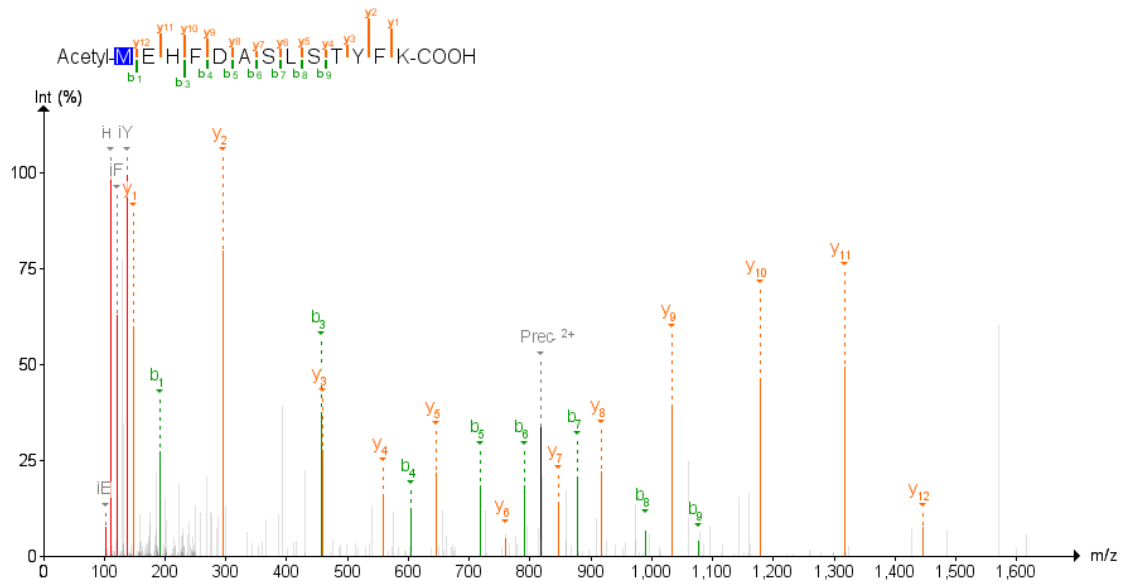

Figure 31: ELOVL5 Second experiment

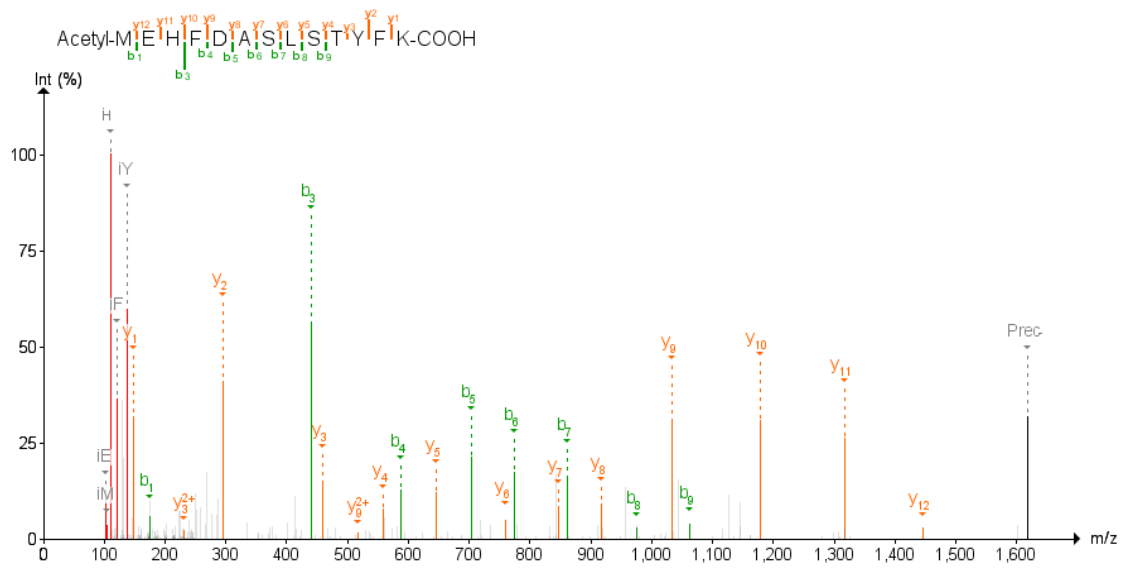

Figure 32: ELOVL5 Third experiment

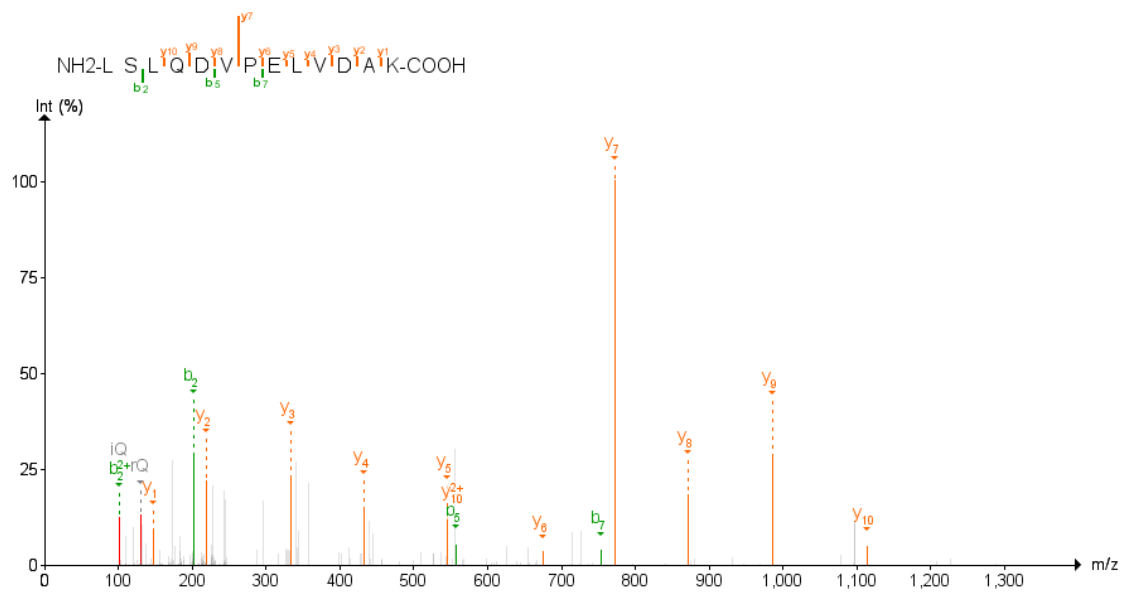

Figure 33: FAM101B First experiment

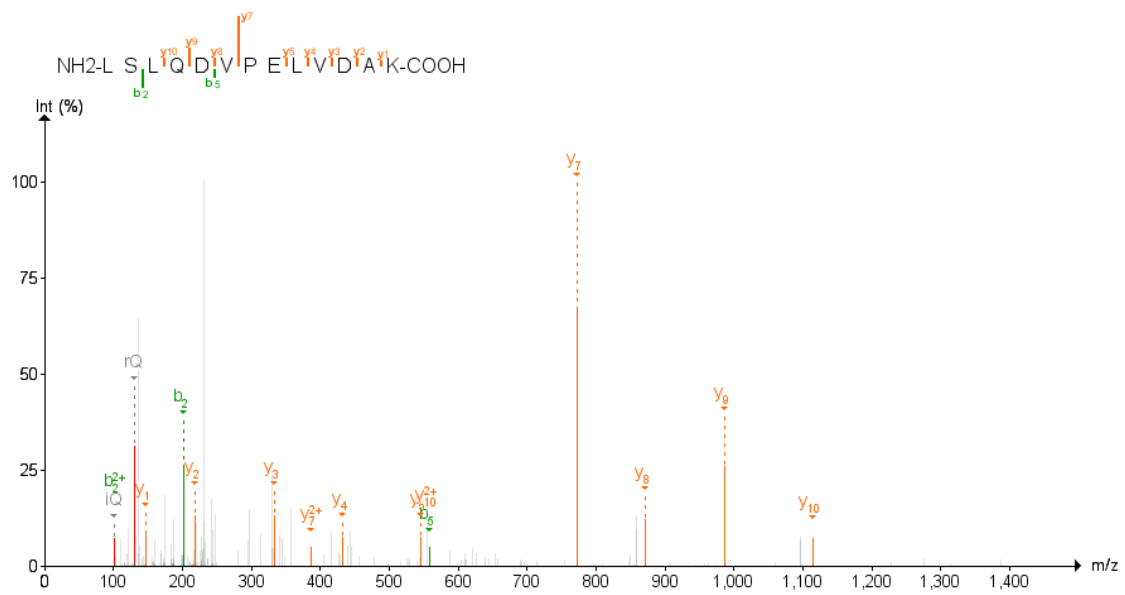

Figure 34: FAM101B Second experiment

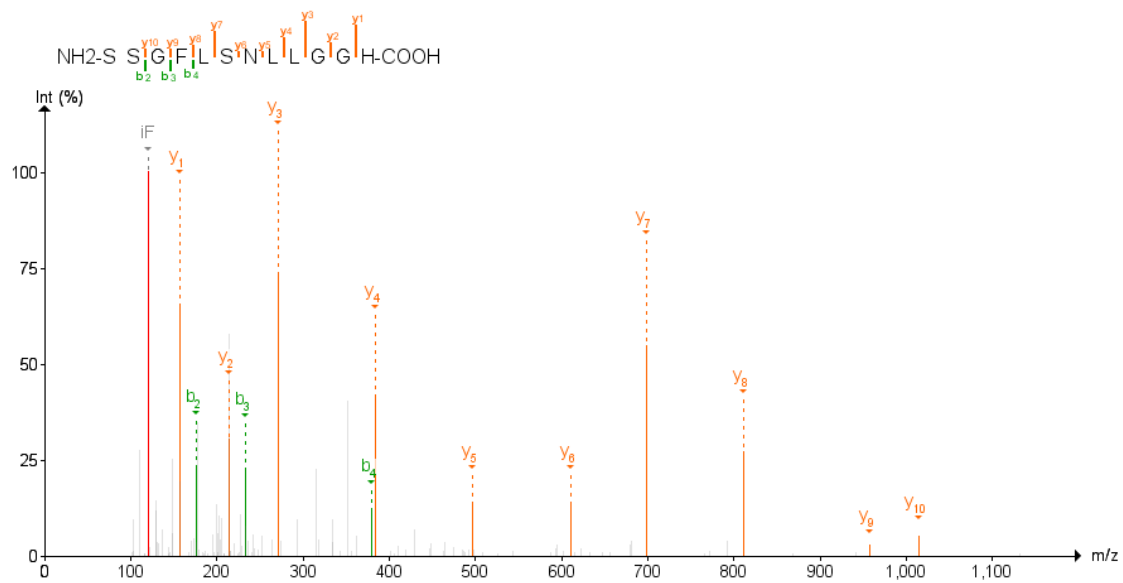

Figure 35: FAM134B First experiment

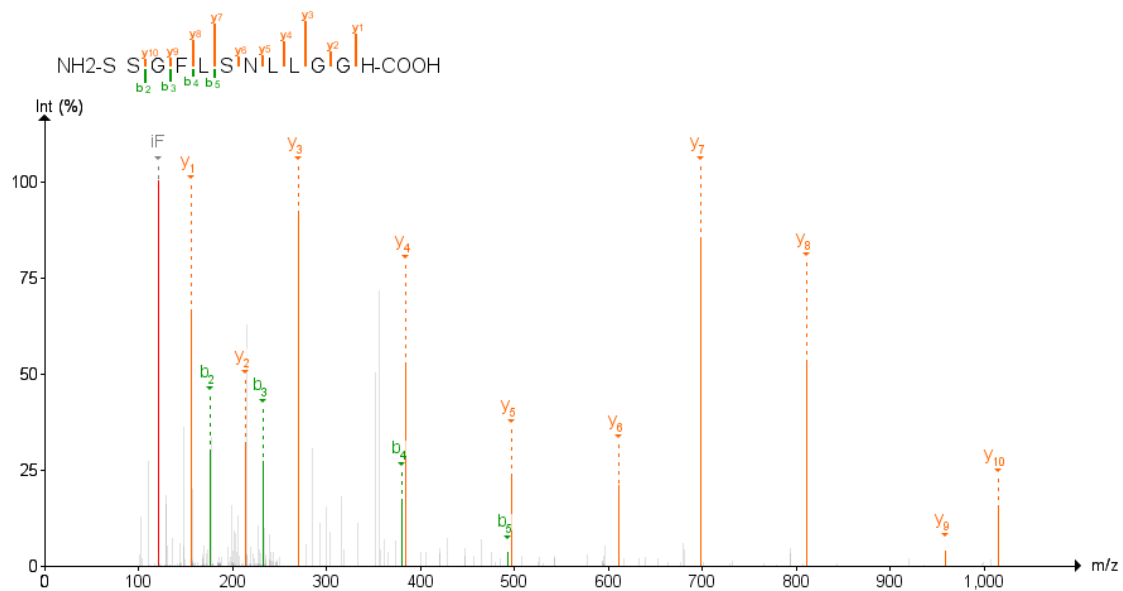

Figure 36: FAM134B Second experiment

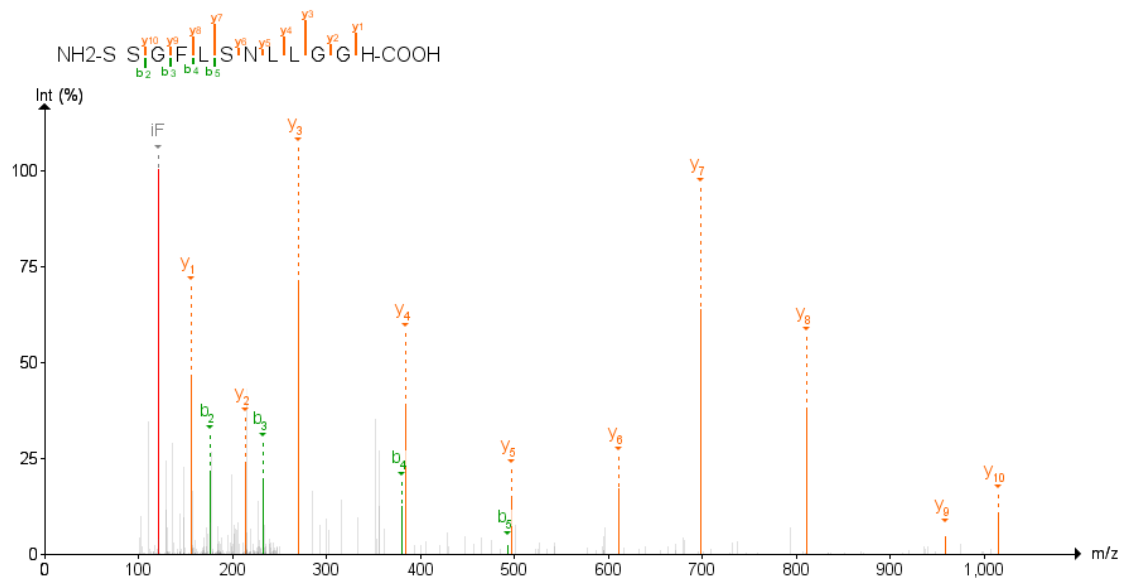

Figure 37: FAM134B Third experiment

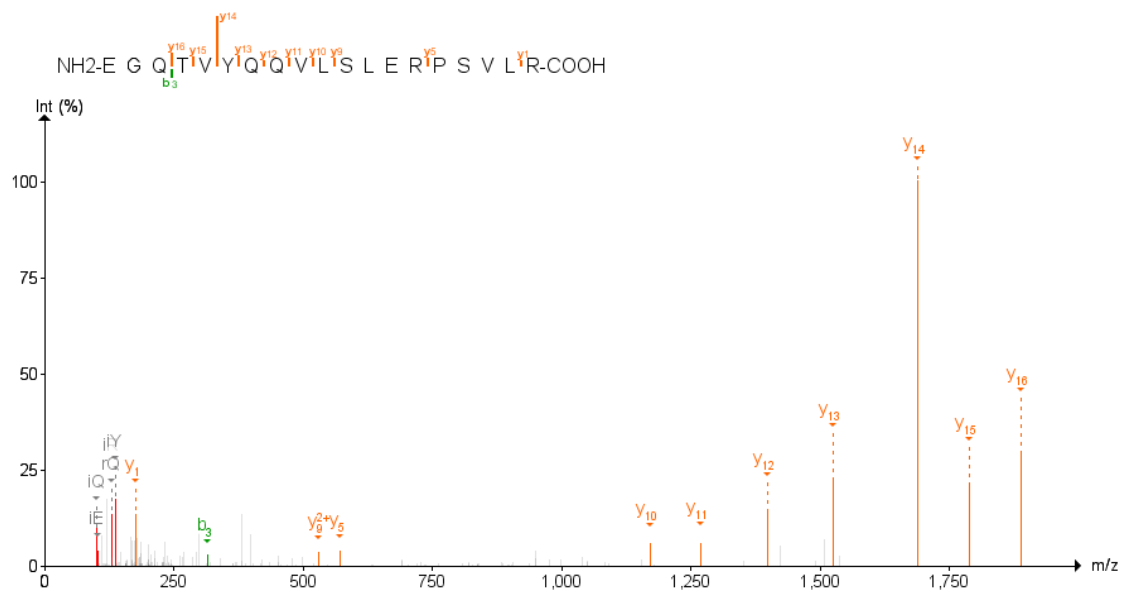

Figure 38: GBA2 First experiment

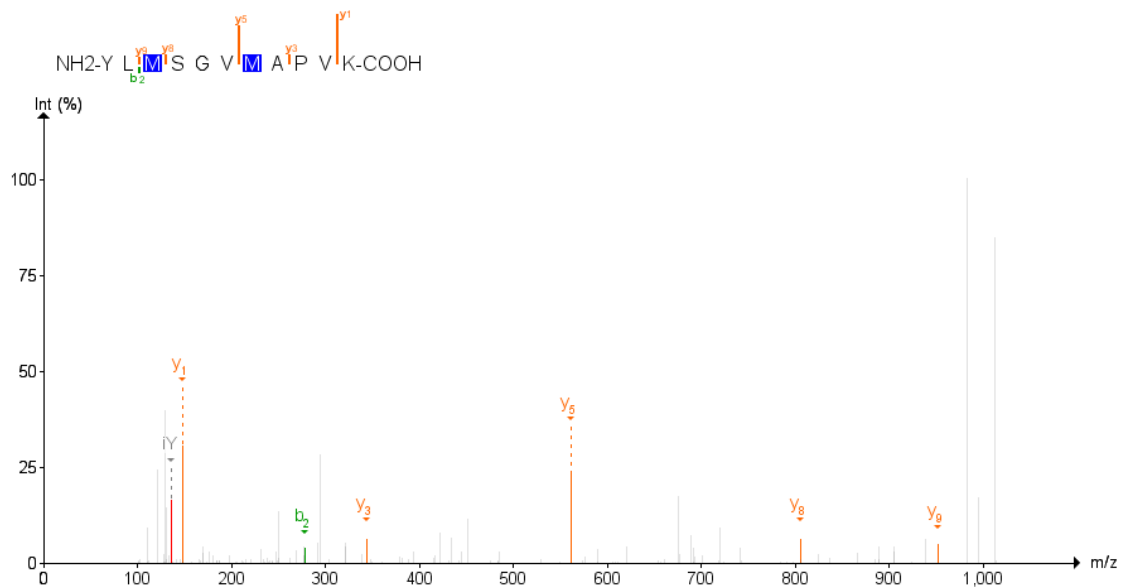

Figure 39: GBA2 Second experiment

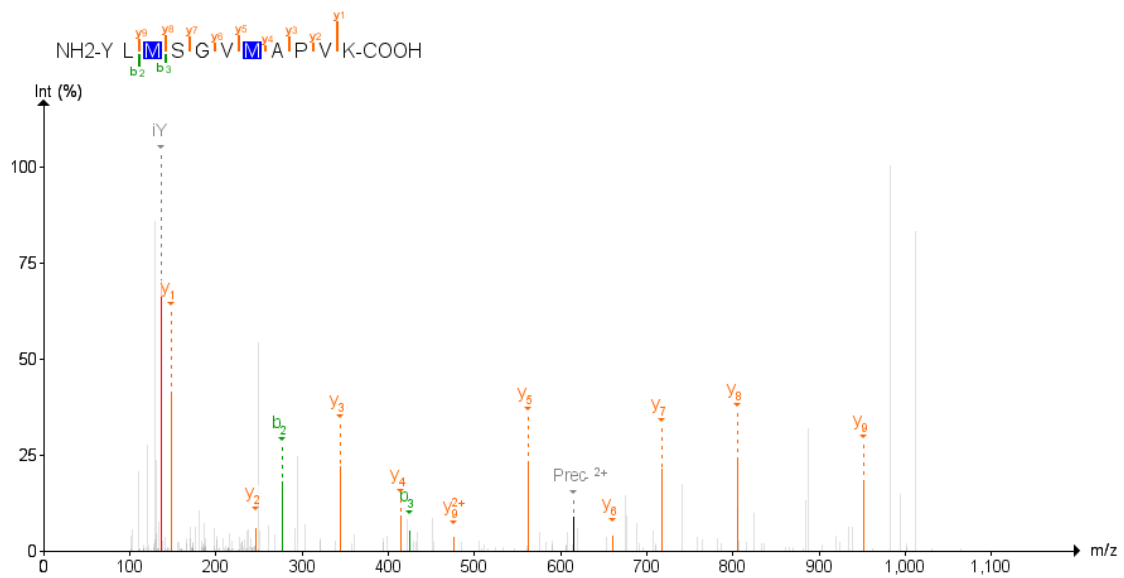

Figure 40: GBA2 Third experiment



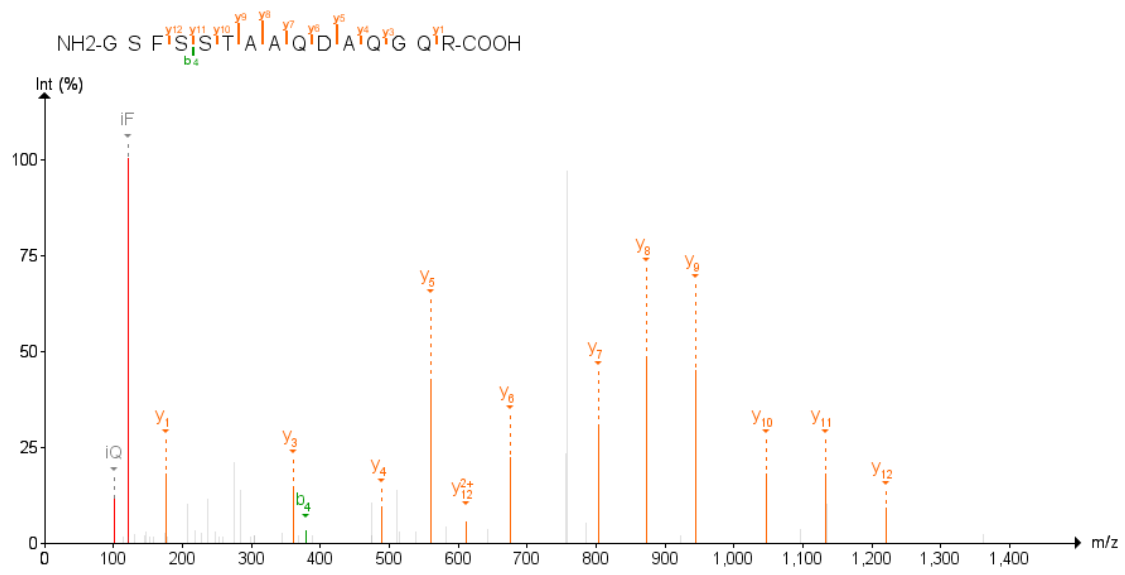

Figure 41: GPR180 First experiment

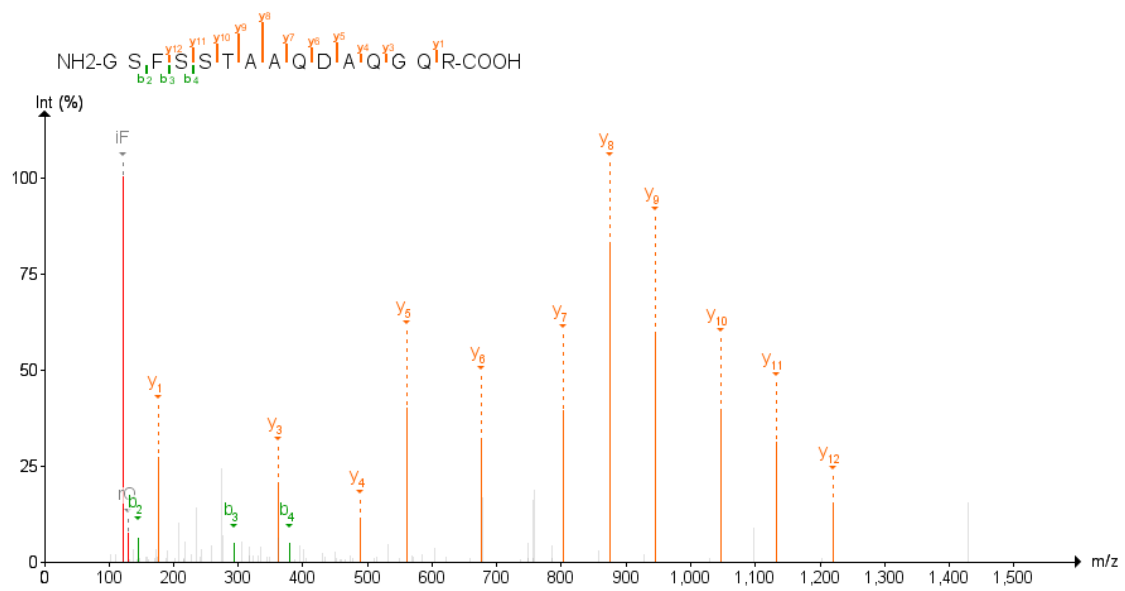

Figure 42: GPR180 Second experiment

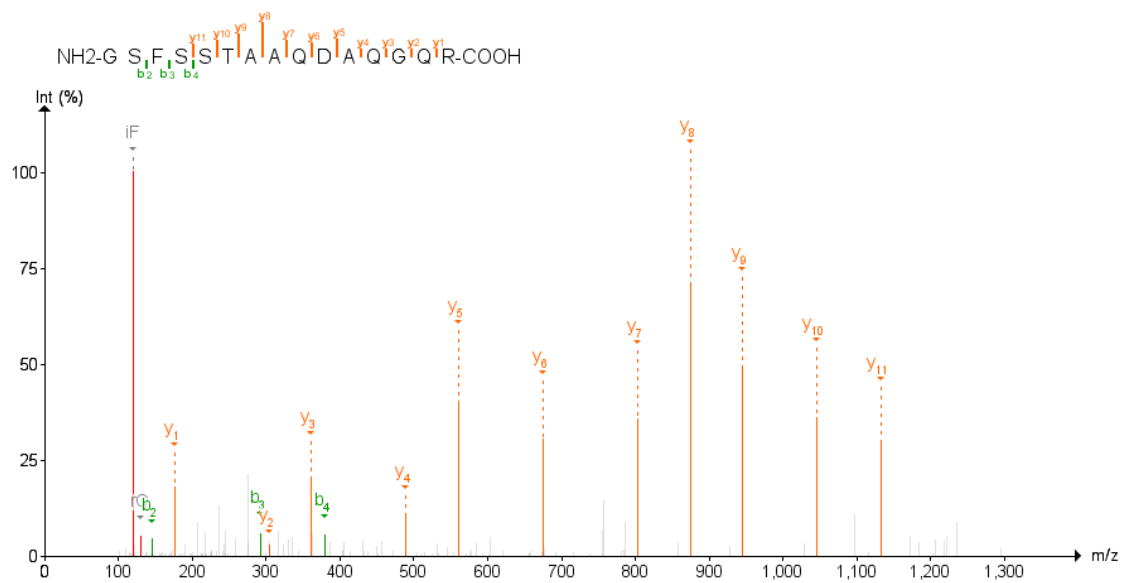

Figure 43: GPR180 Third experiment

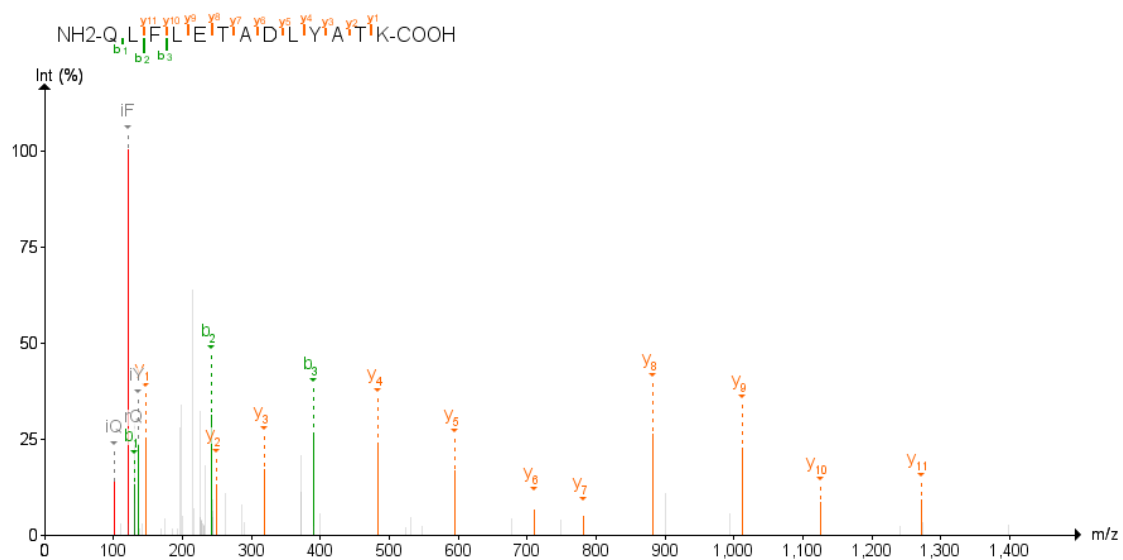

Figure 44: GPR89B;GPR89A First experiment

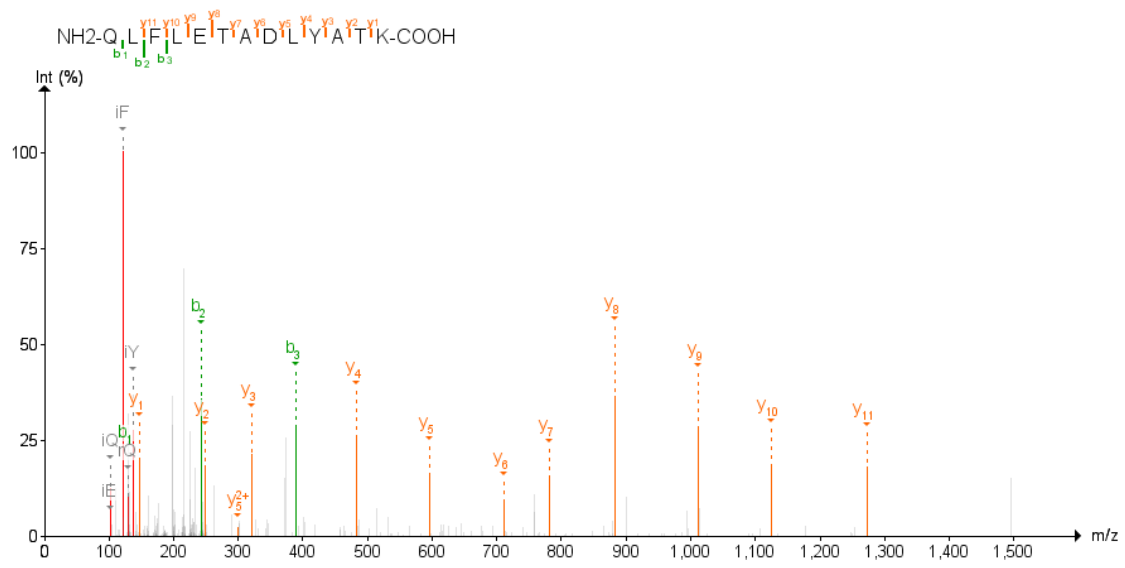

Figure 45: GPR89B;GPR89A Second experiment

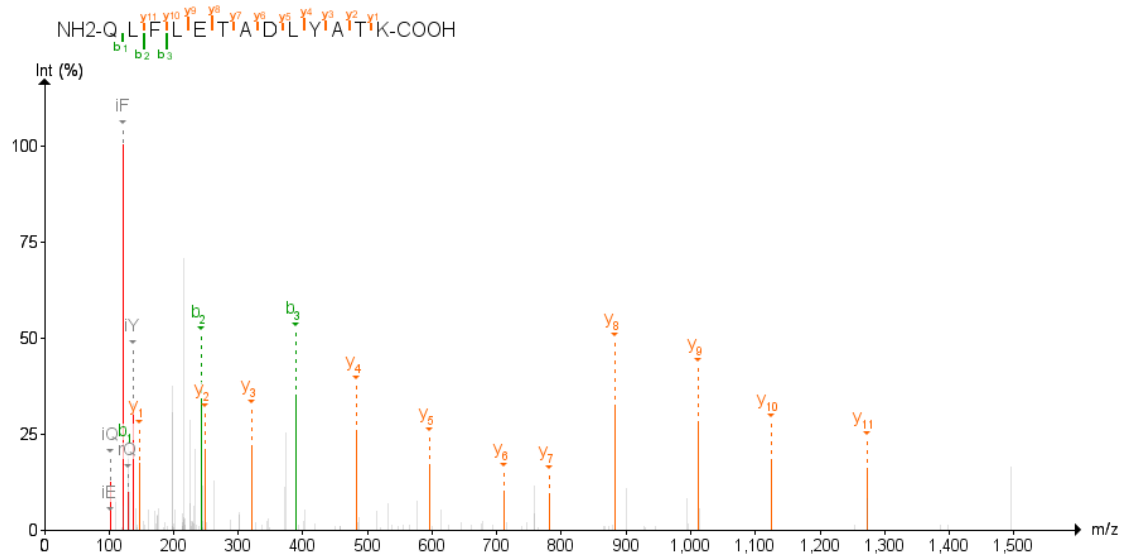

Figure 46: GPR89B;GPR89A Third experiment

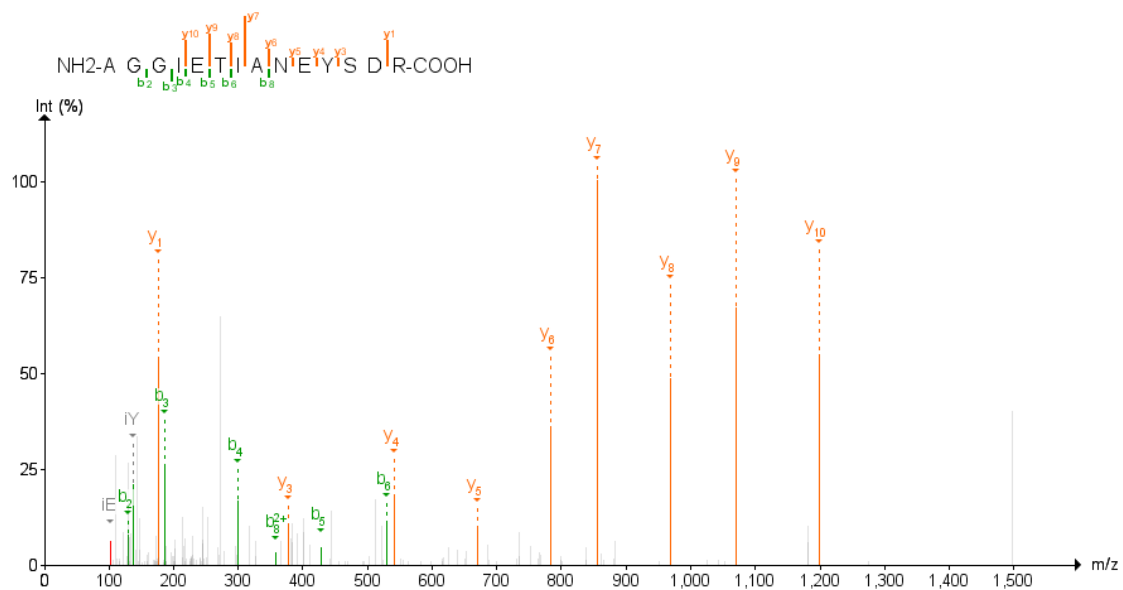

Figure 47: HSPA4 Second experiment

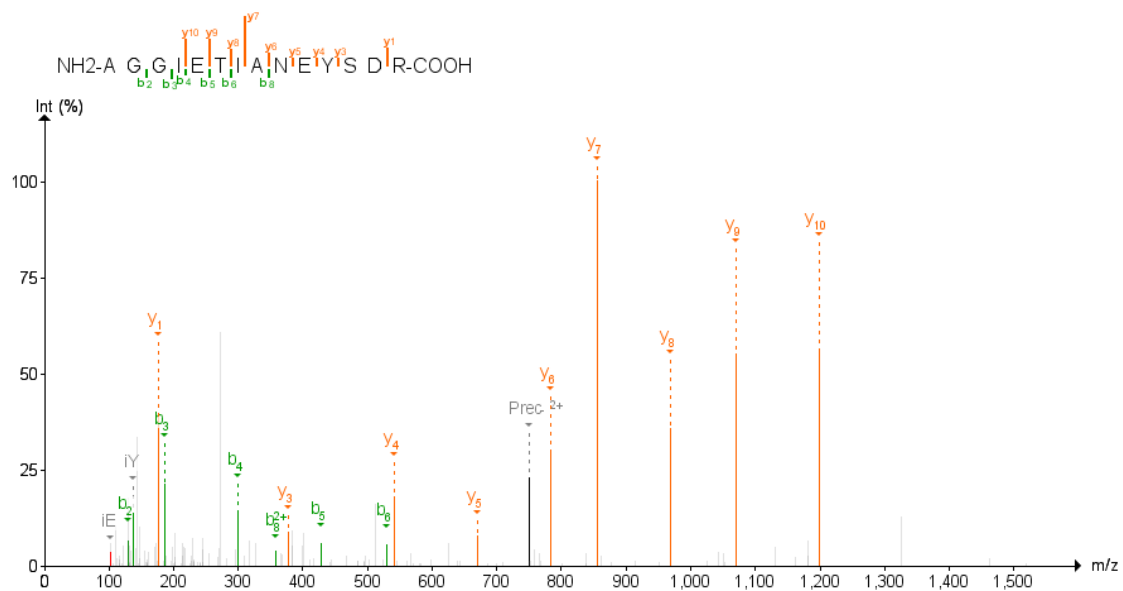

Figure 48: HSPA4 Third experiment

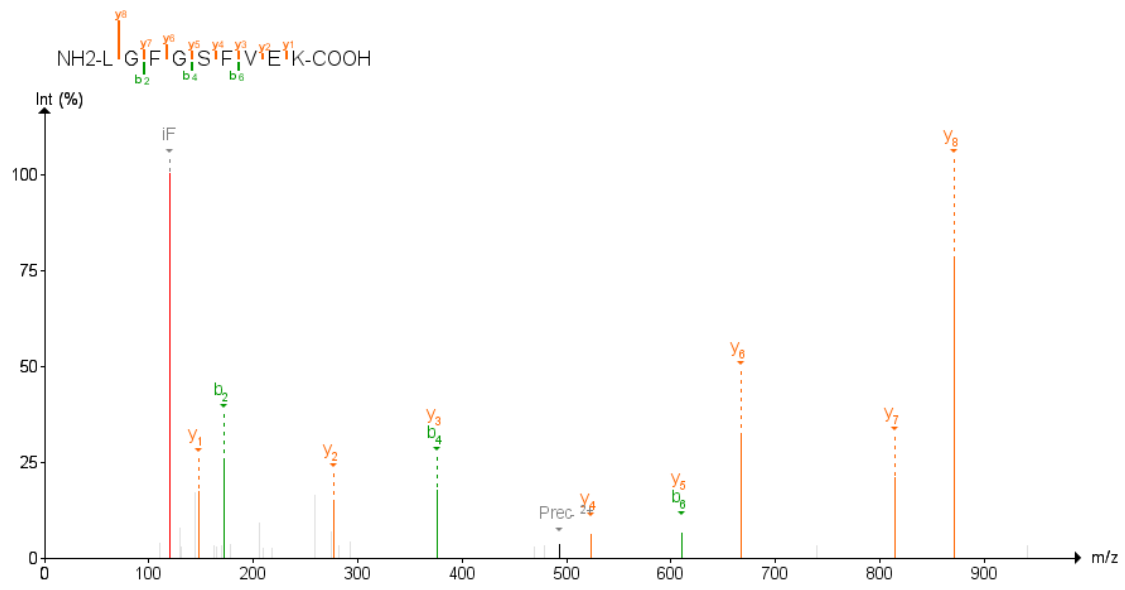

Figure 49: ITGB6 First experiment

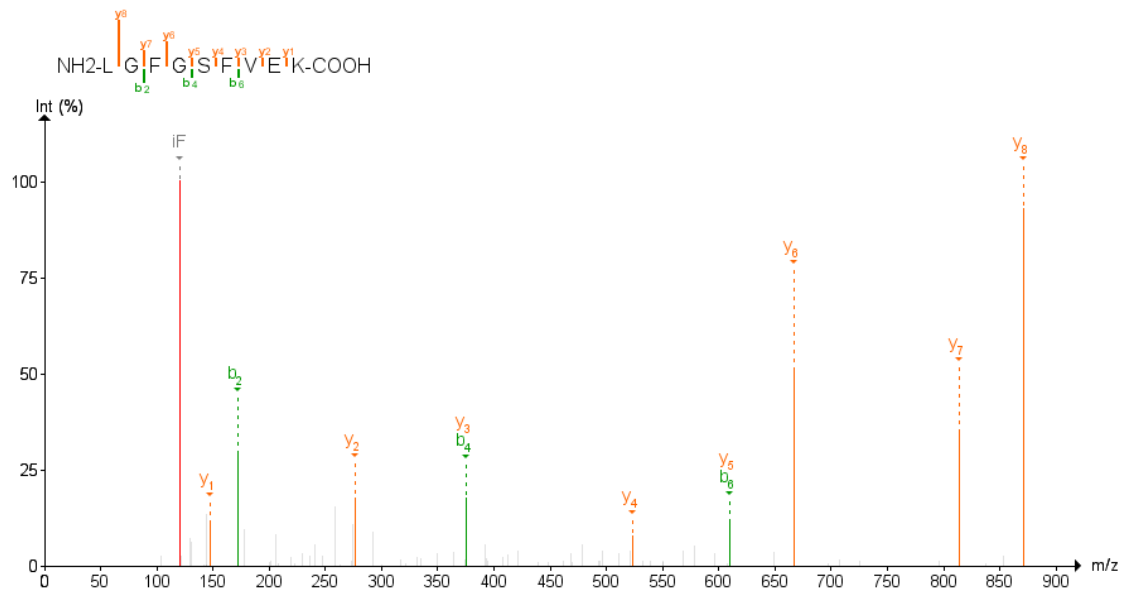

Figure 50: ITGB6 Second experiment

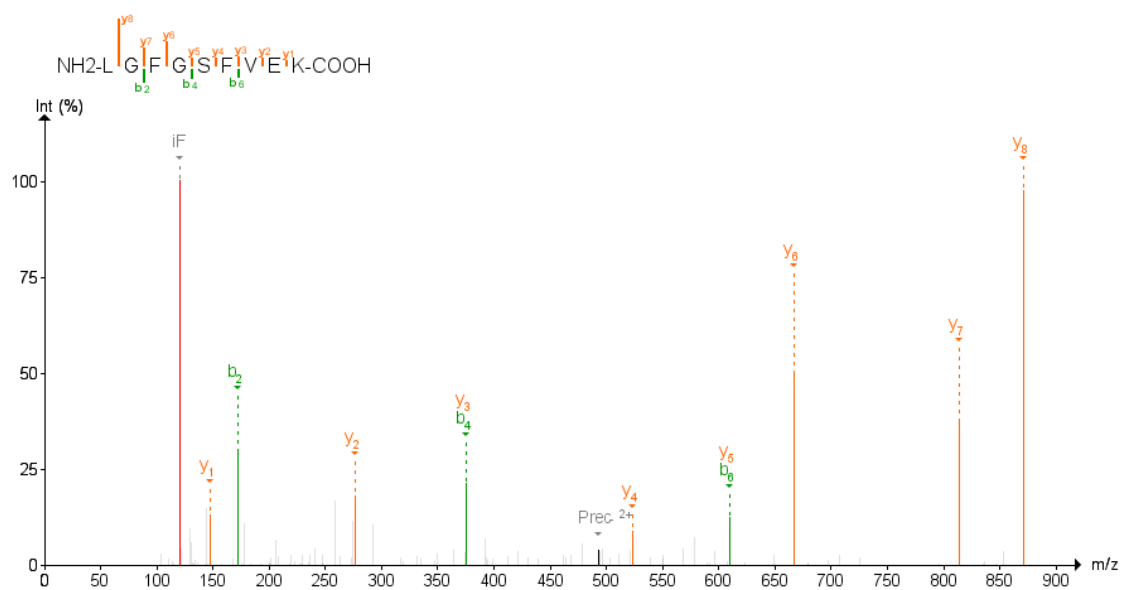

Figure 51: ITGB6 Third experiment

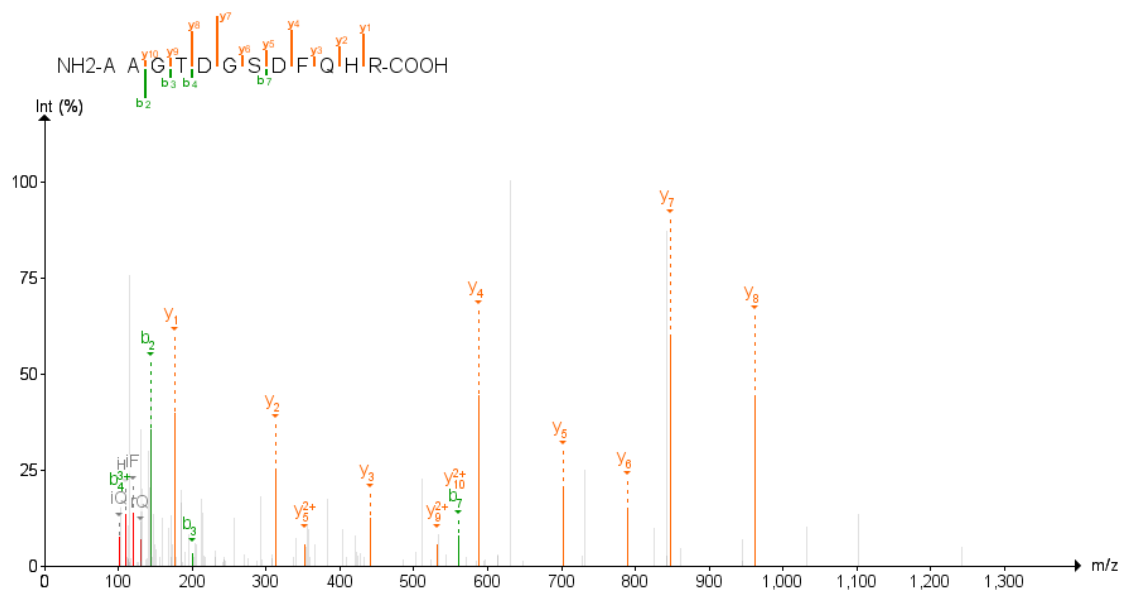

Figure 52: JAGN1 Second experiment

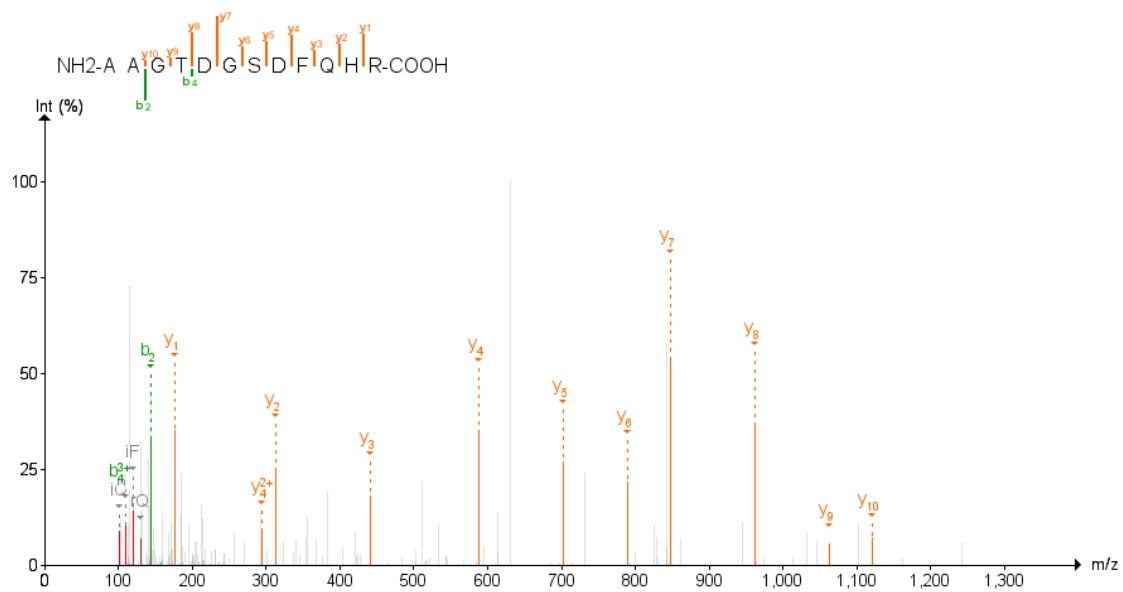

Figure 53: JAGN1 Third experiment

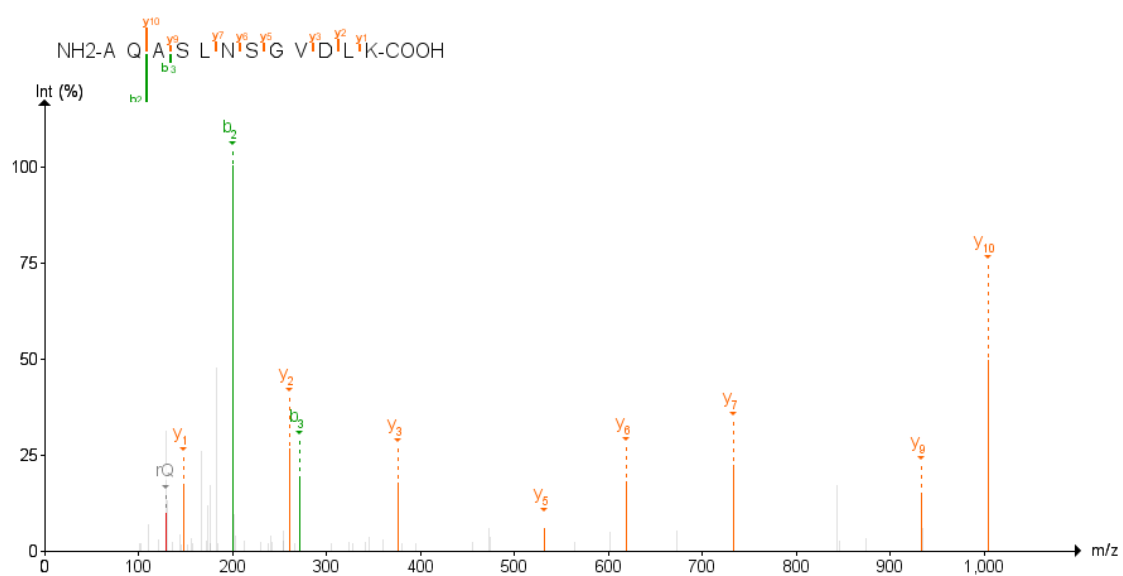

Figure 54: MOB3B First experiment

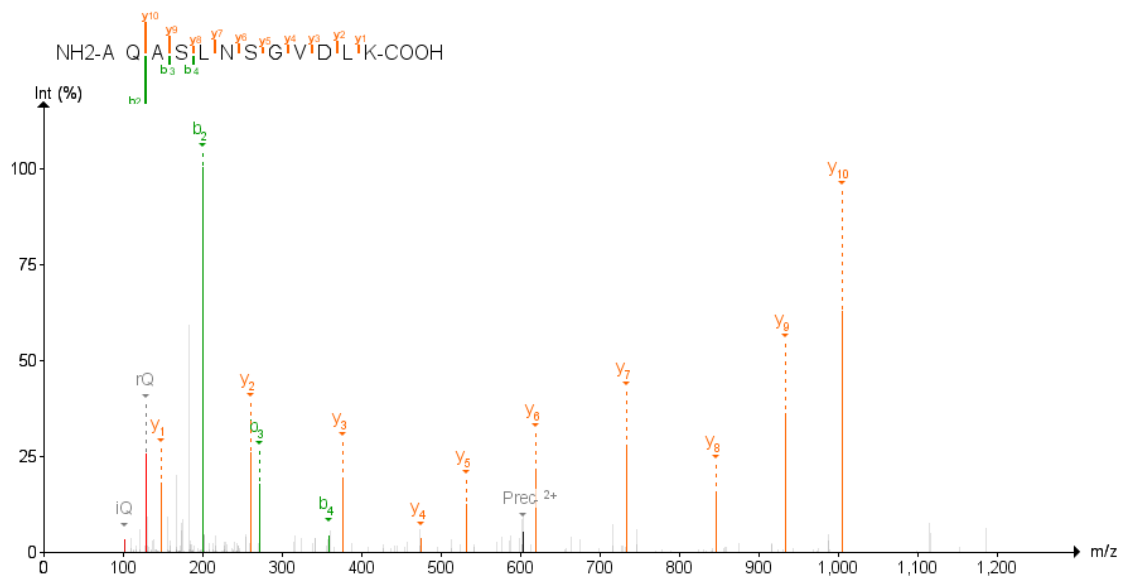

Figure 55: MOB3B Second experiment

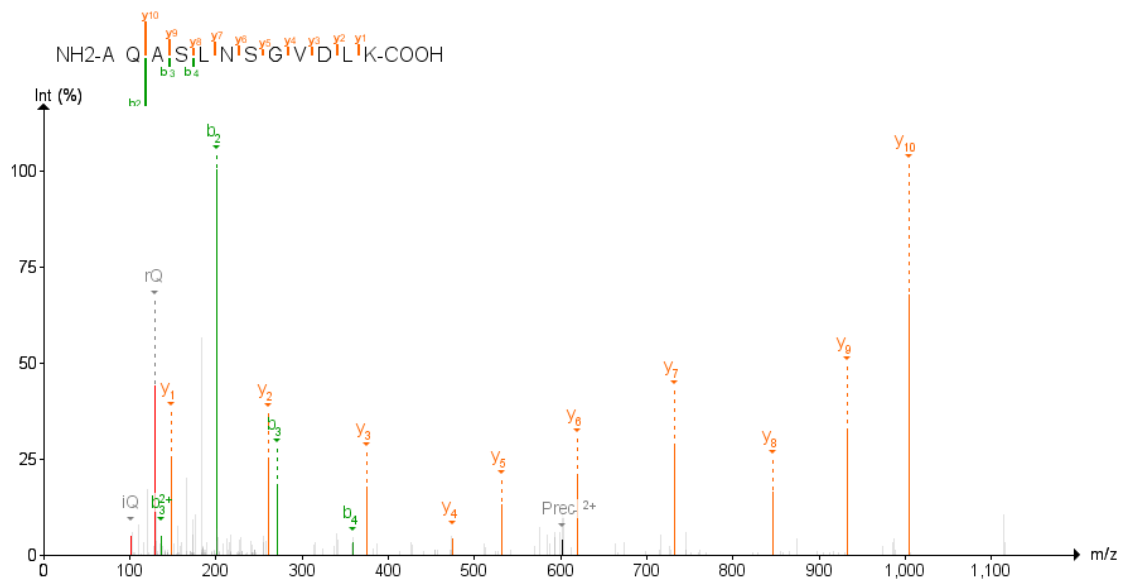

Figure 56: MOB3B Third experiment



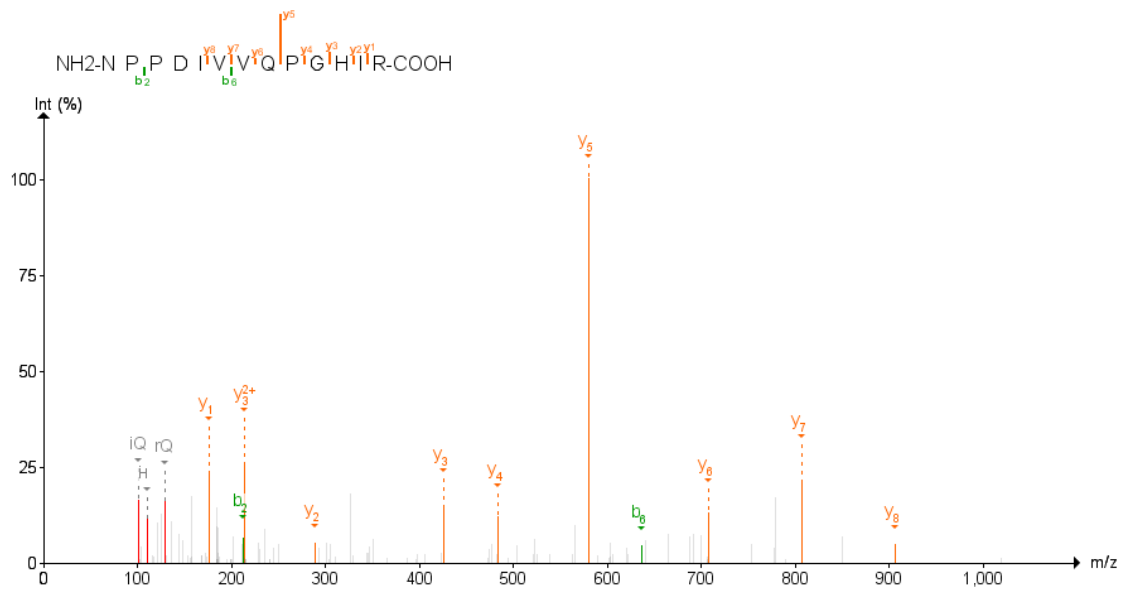

Figure 57: MPZL1 First experiment

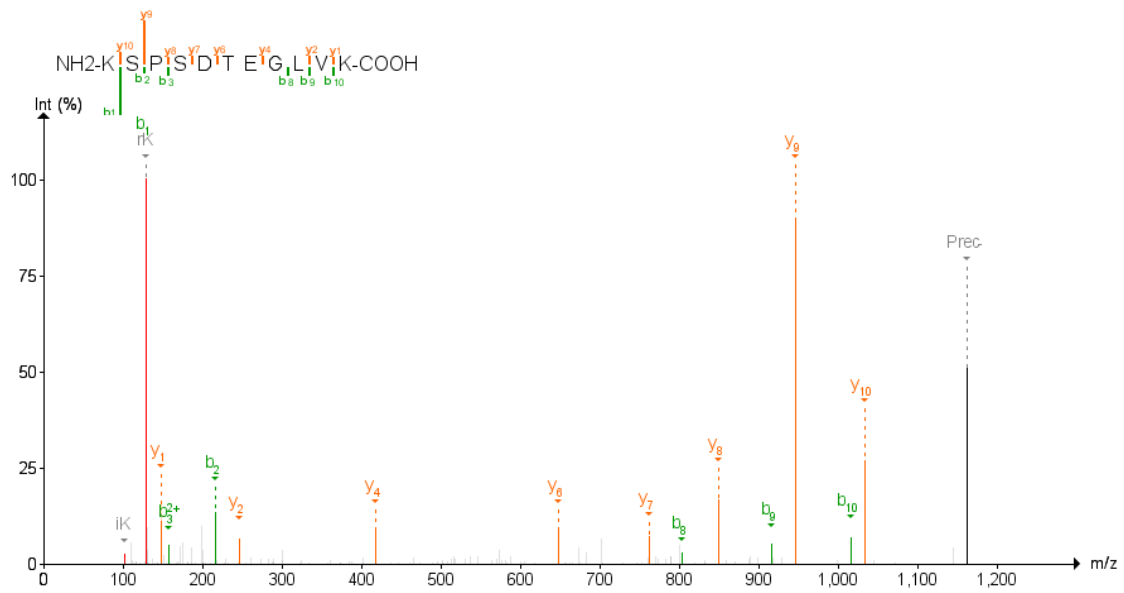

Figure 58: MPZL1 Second experiment

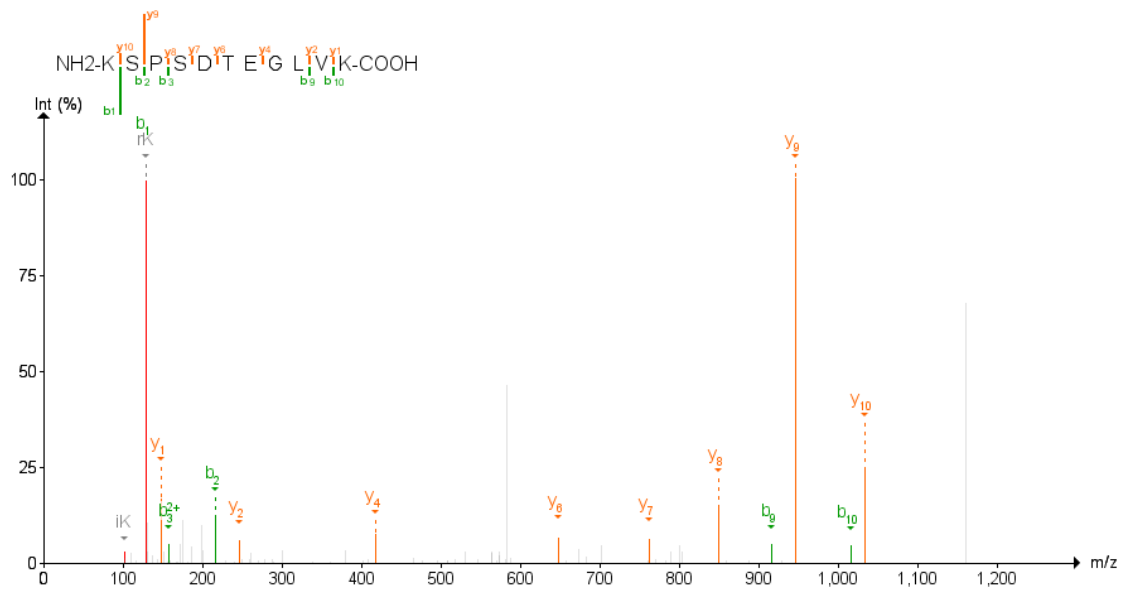

Figure 59: MPZL1 Third experiment

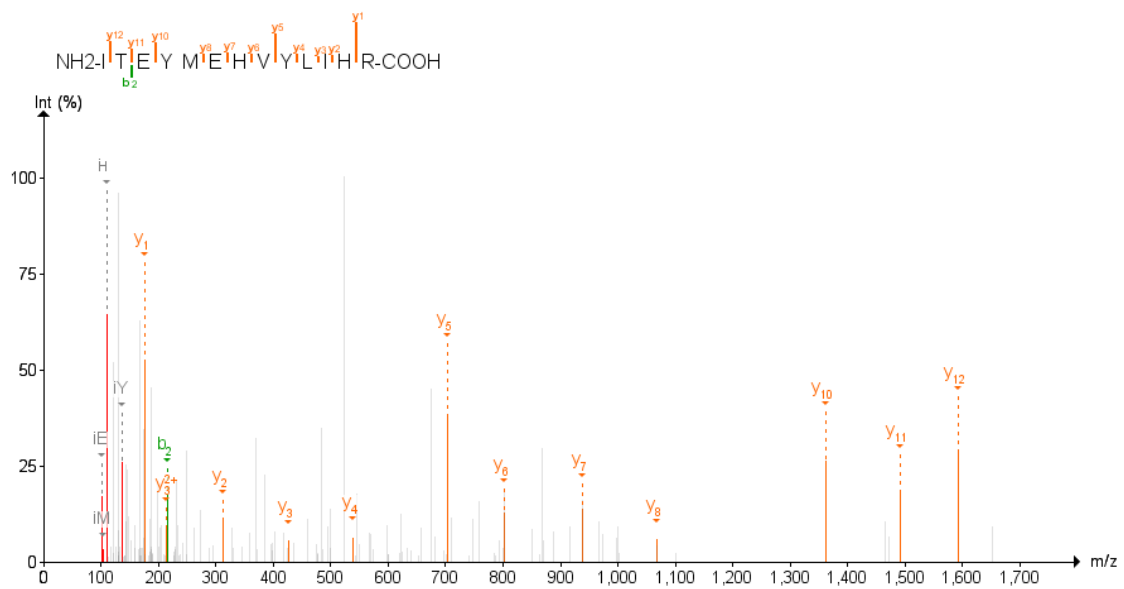

Figure 60: OSBPL2 First experiment

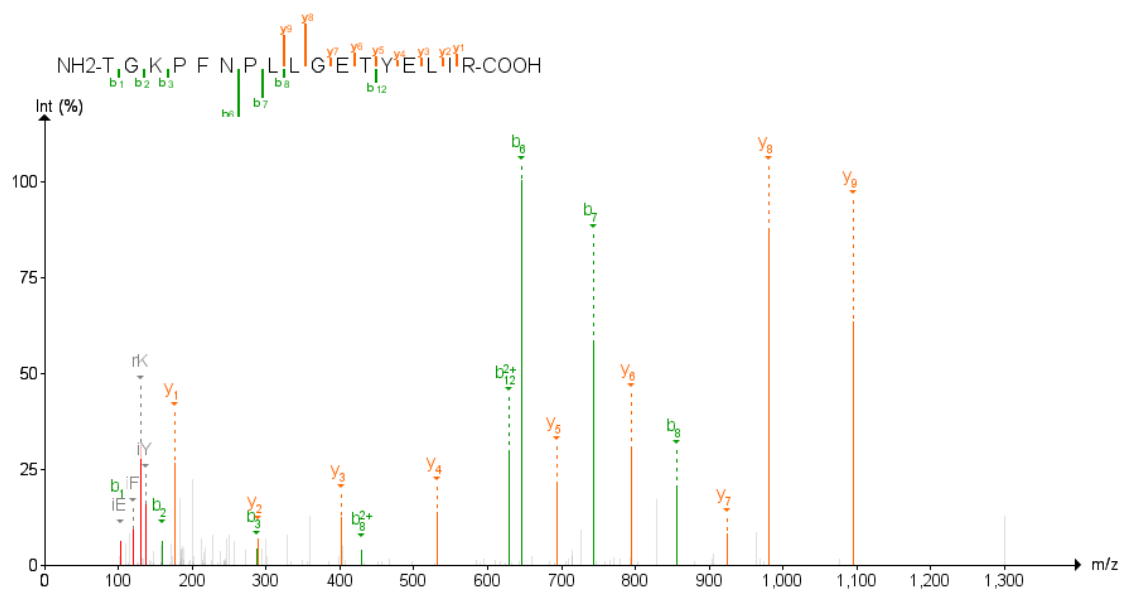

Figure 61: OSBPL2 Second experiment

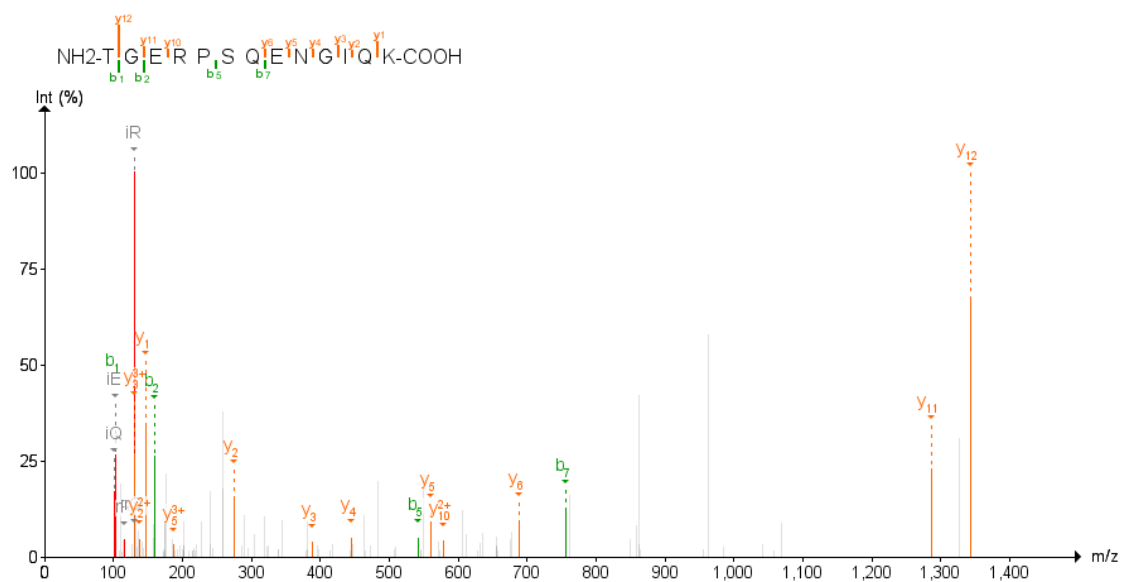

Figure 62: OSBPL2 Third experiment

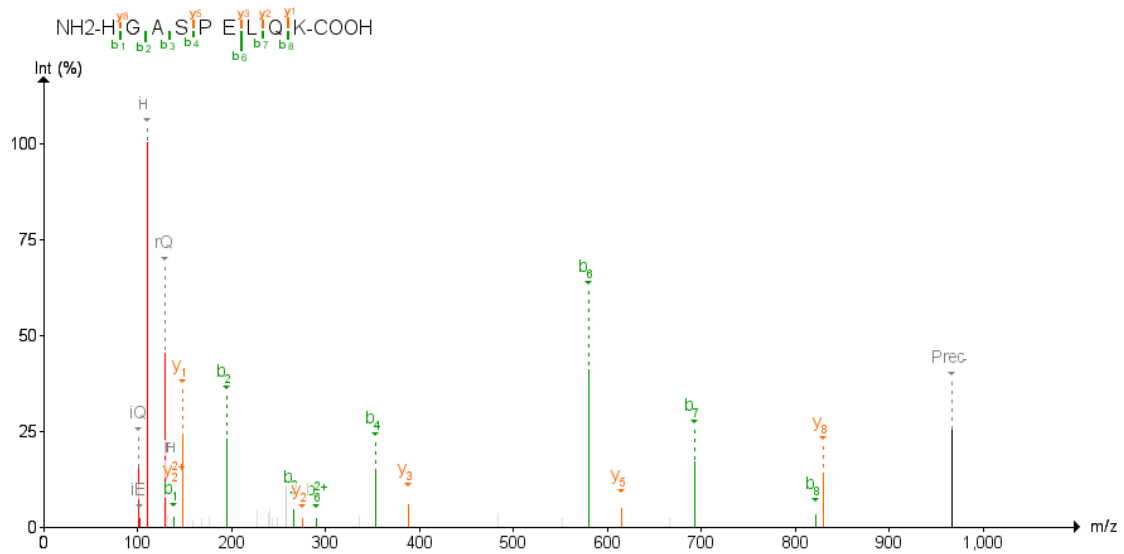

Figure 63: PEX11B First experiment

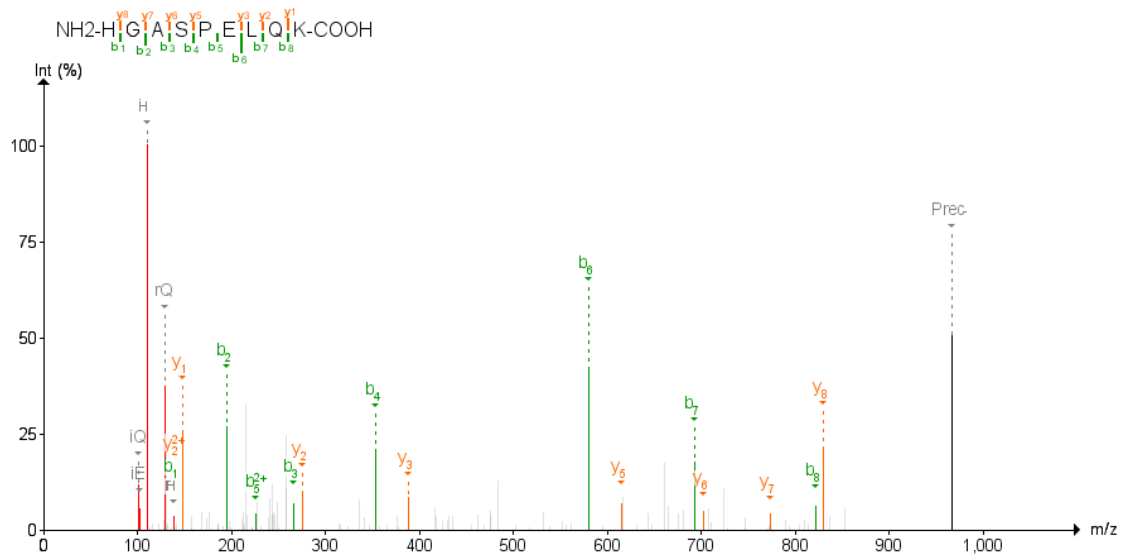

Figure 64: PEX11B Second experiment

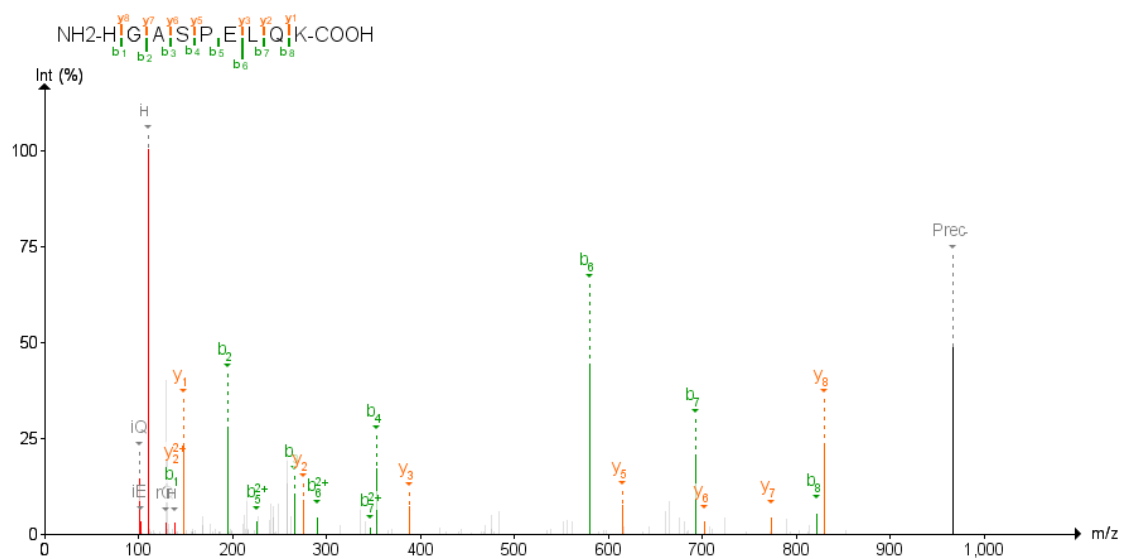

Figure 65: PEX11B Third experiment

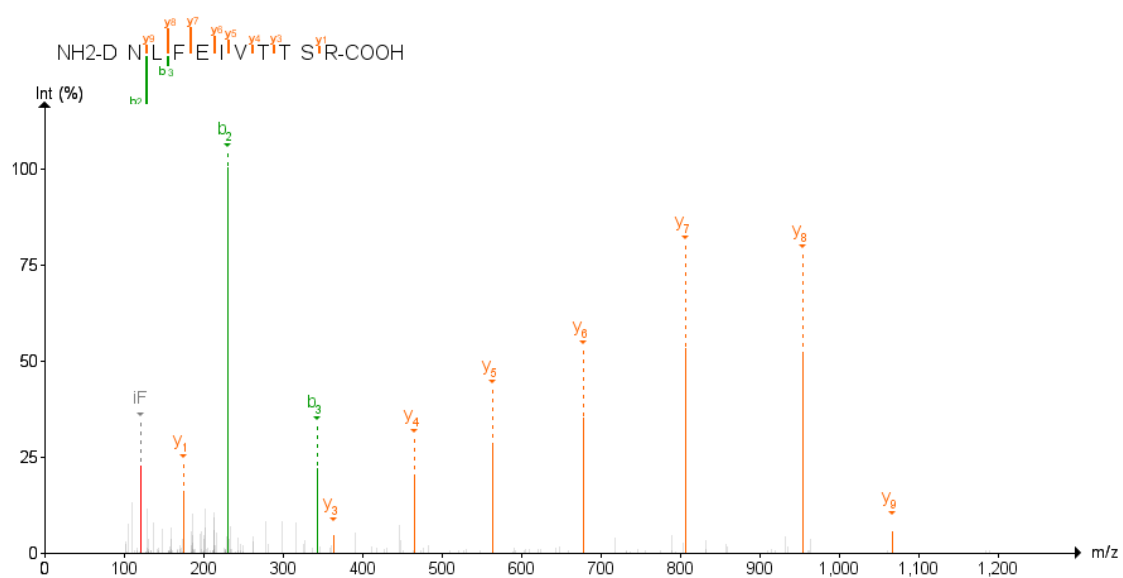

Figure 66: PLEKHA1 First experiment

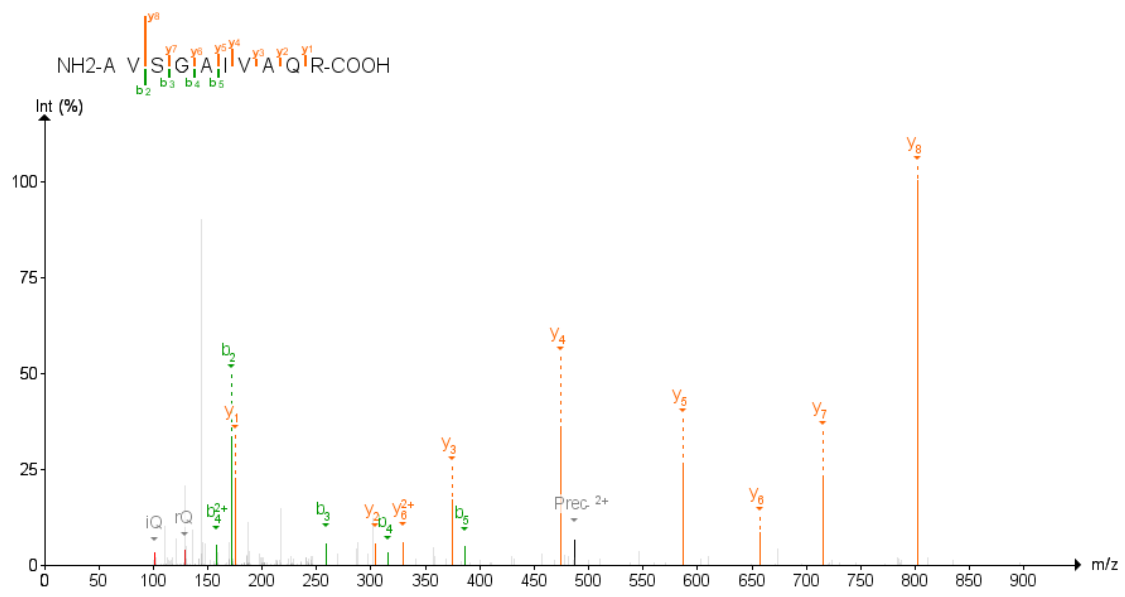

Figure 67: PLEKHA1 Second experiment

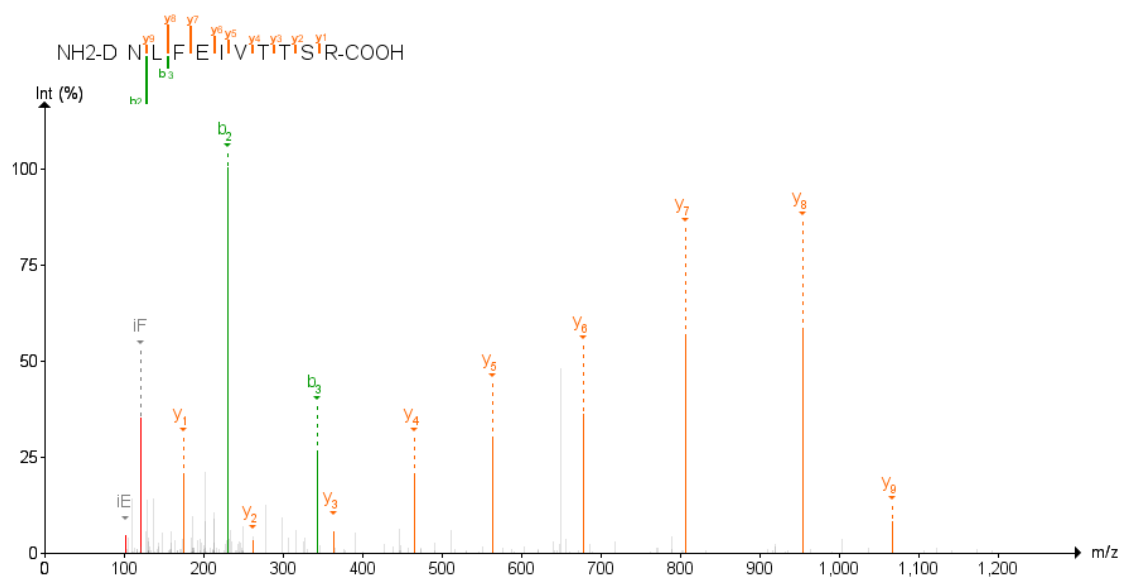

Figure 68: PLEKHA1 Third experiment

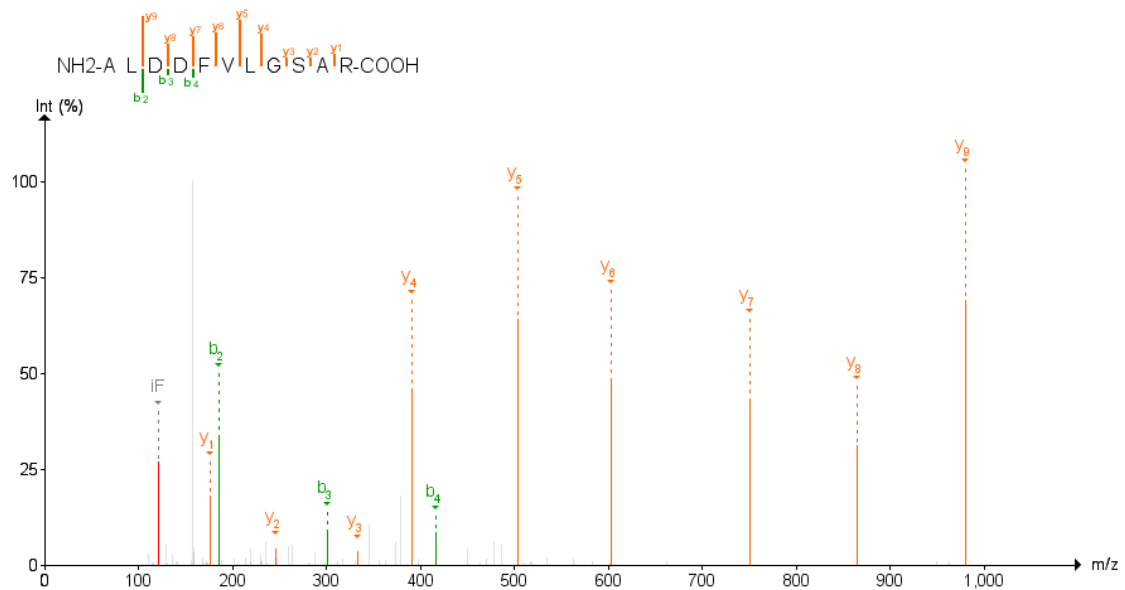

Figure 69: PRAF2 First experiment

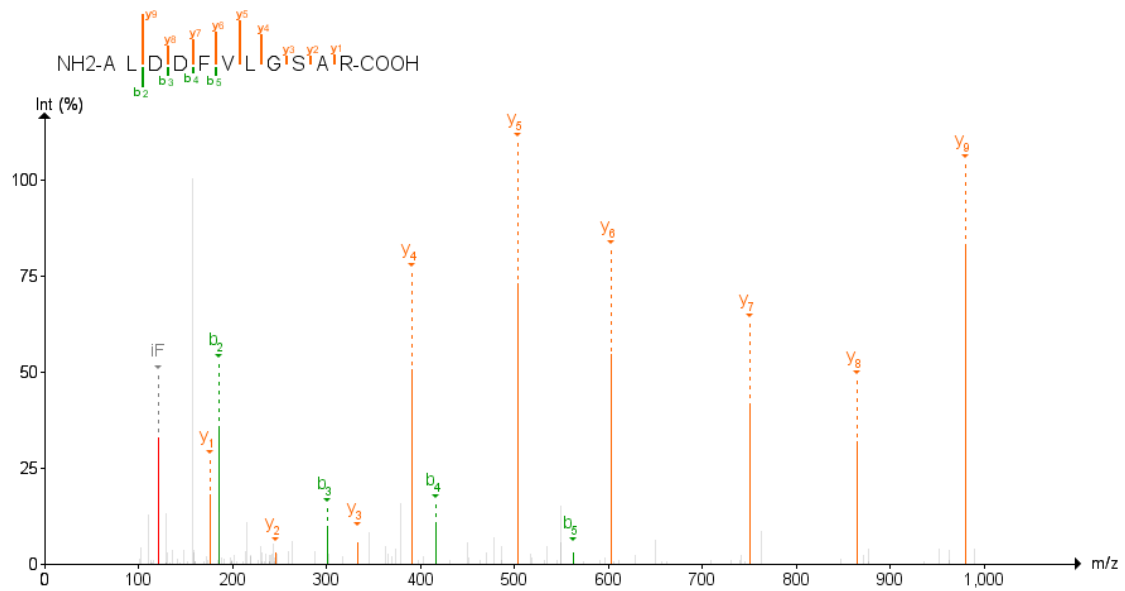

Figure 70: PRAF2 Second experiment

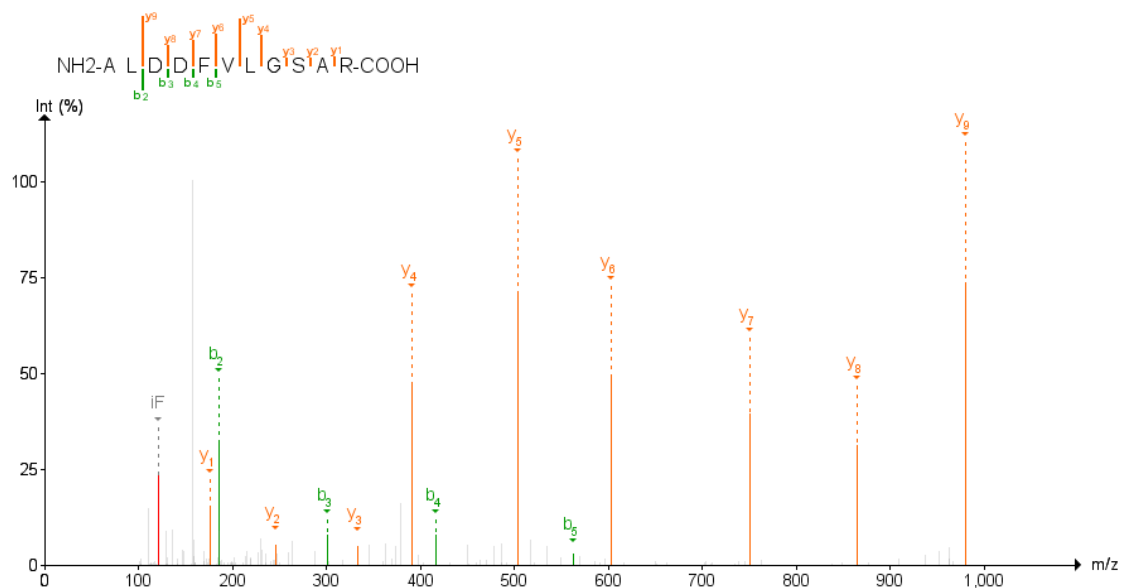

Figure 71: PRAF2 Third experiment

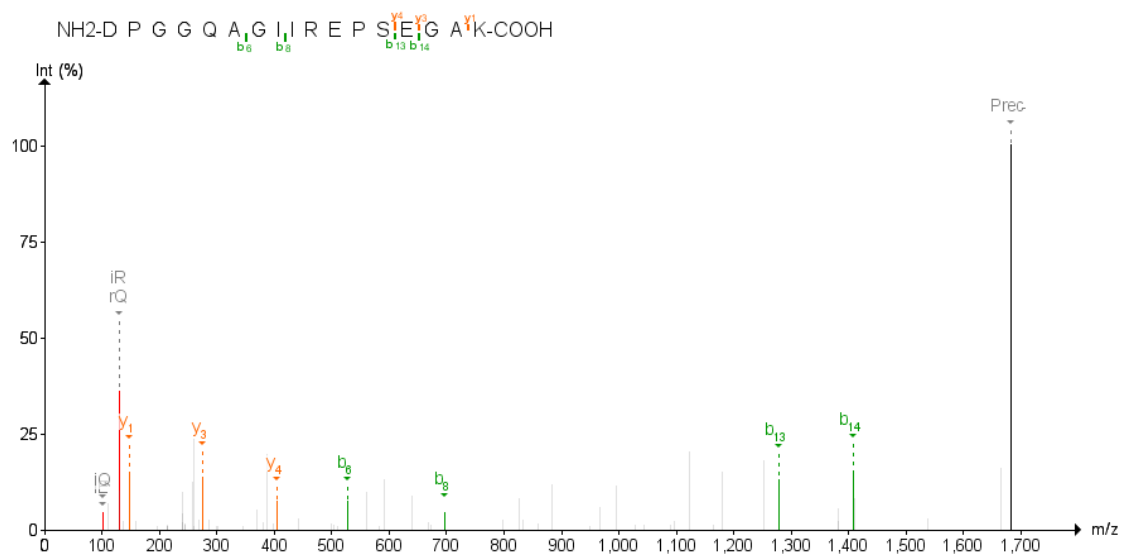

Figure 72: PRR14L First experiment



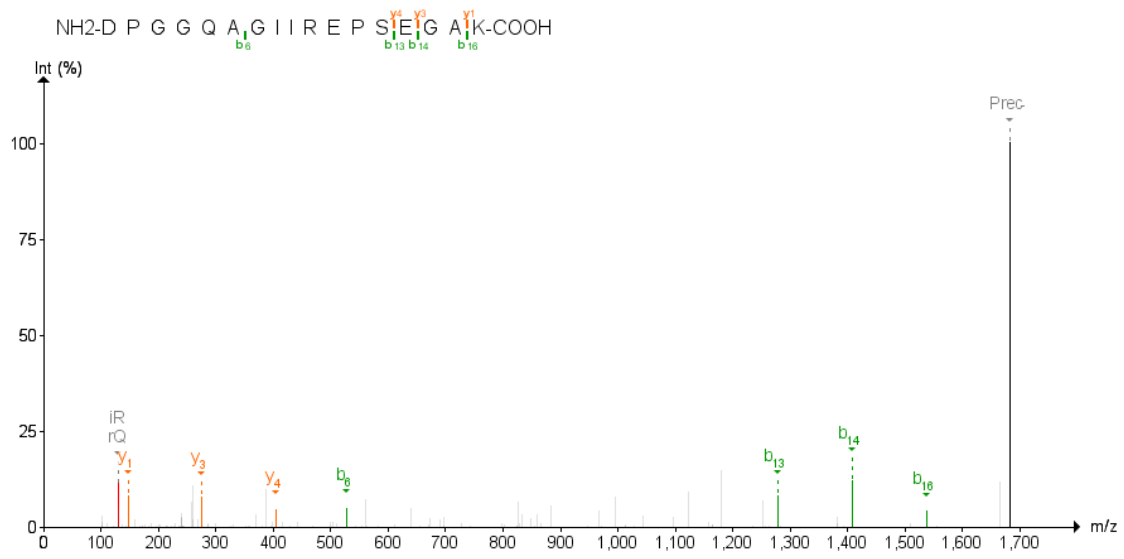

Figure 73: PRR14L First experiment

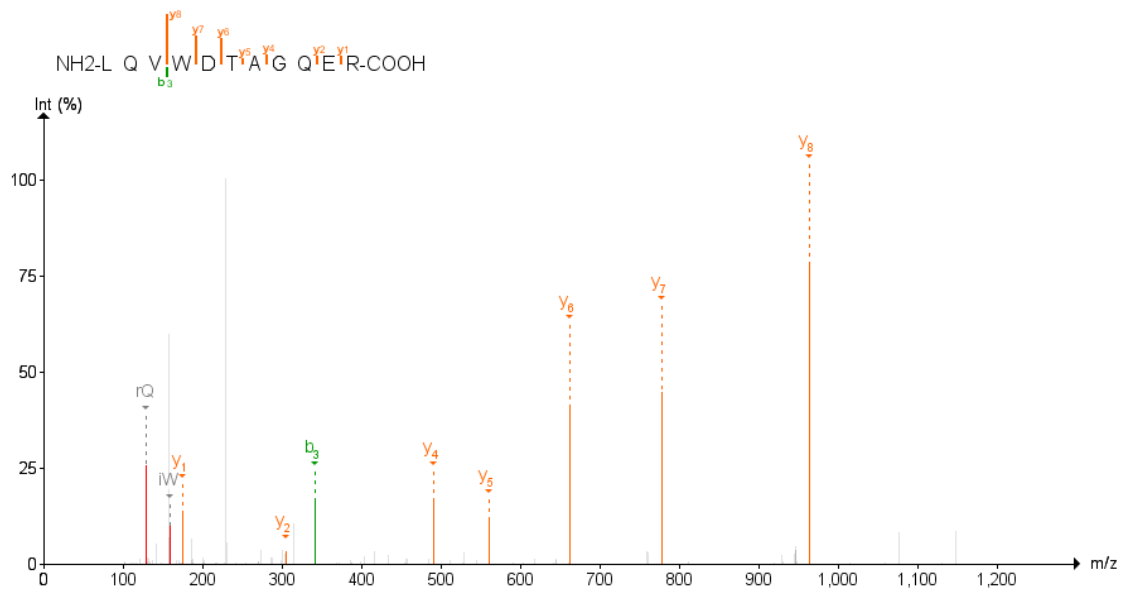

Figure 74: RAB13 Second experiment

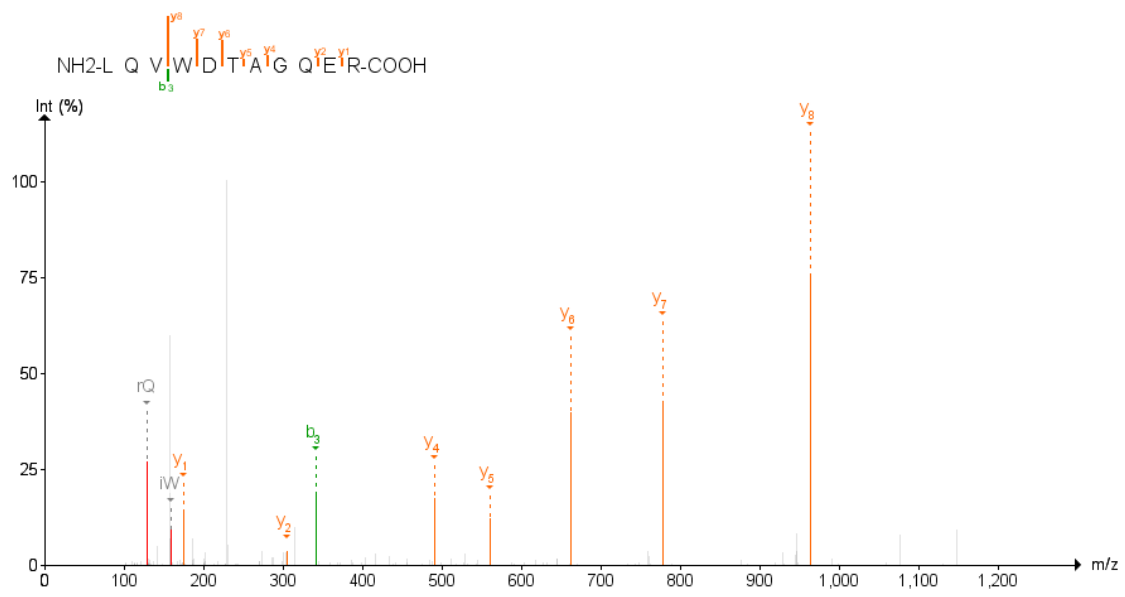

Figure 75: RAB13 Third experiment

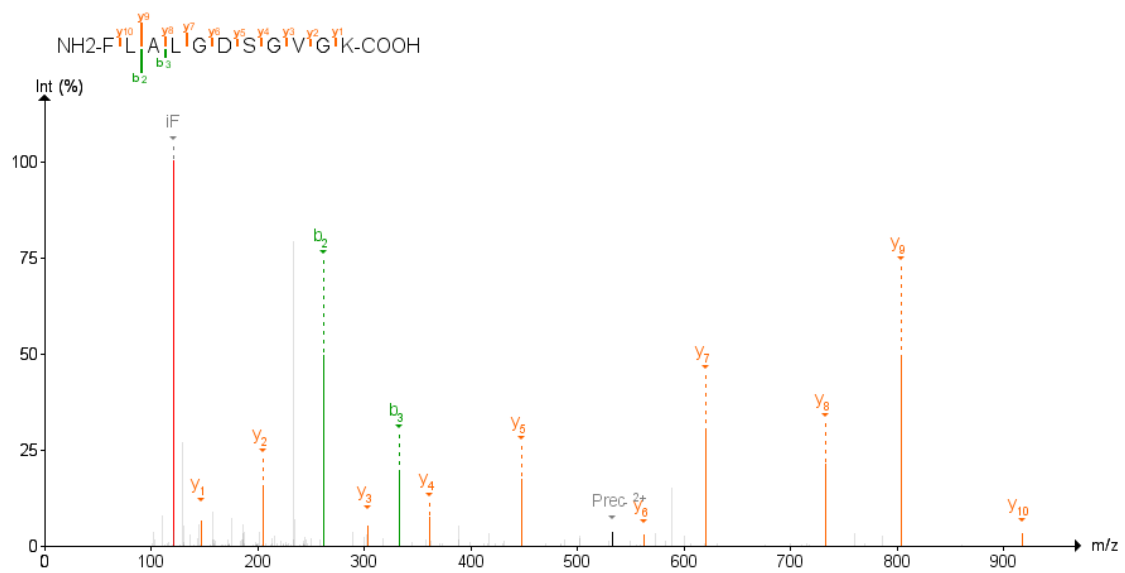

Figure 76: RAB27A Second experiment

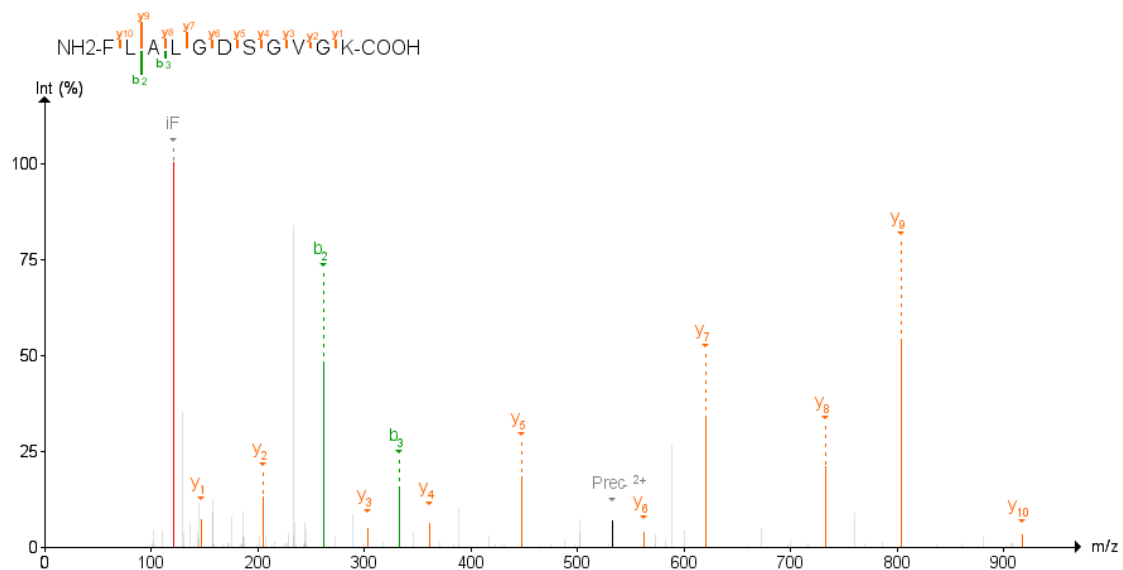

Figure 77: RAB27A Third experiment

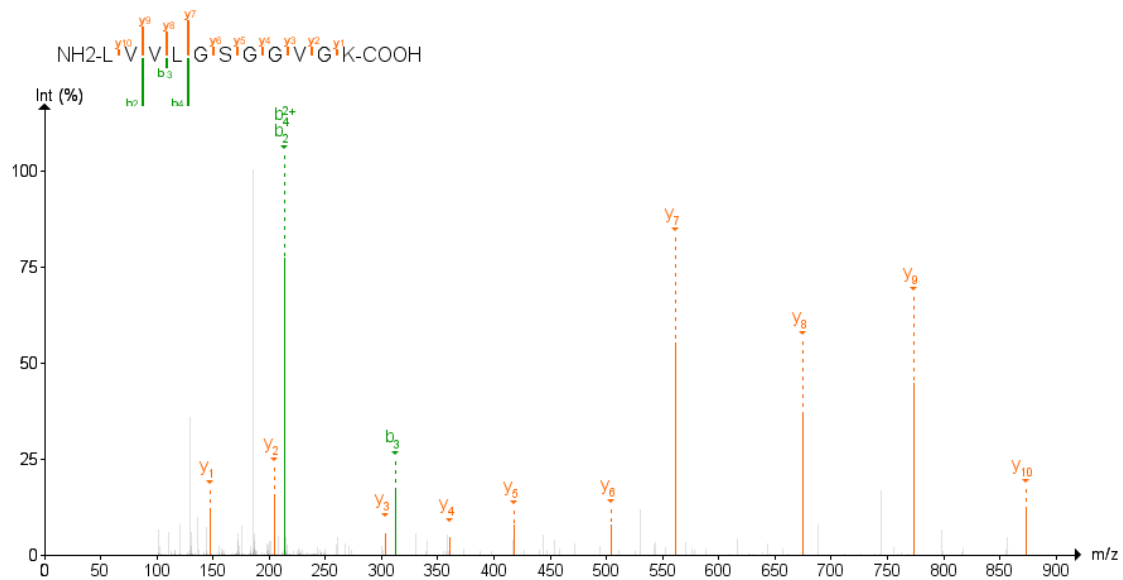

Figure 78: RAP1A;RAP1B Second experiment

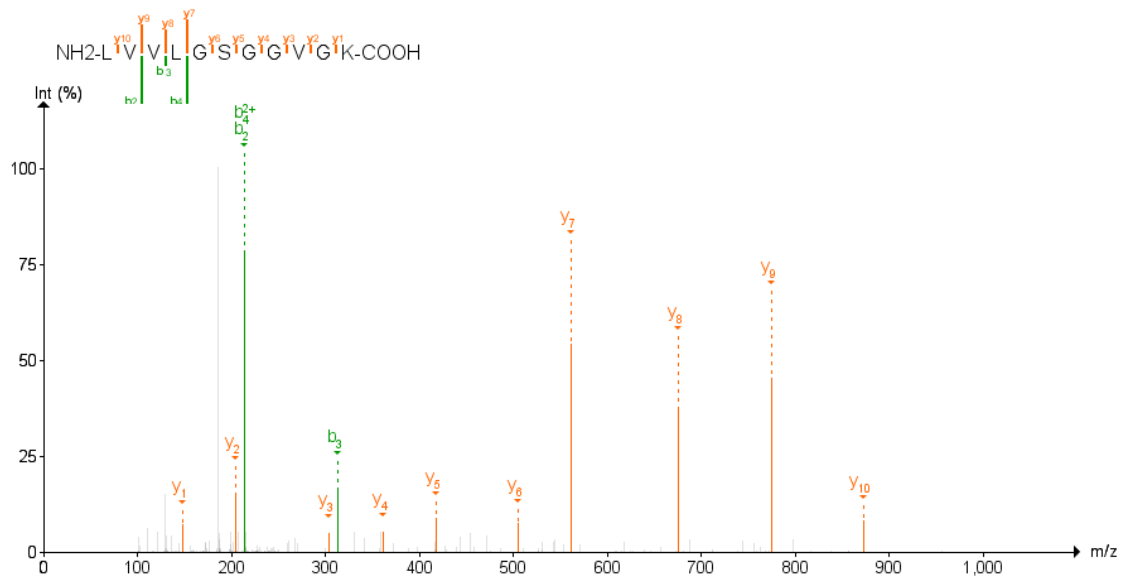

Figure 79: RAP1A;RAP1B Third experiment

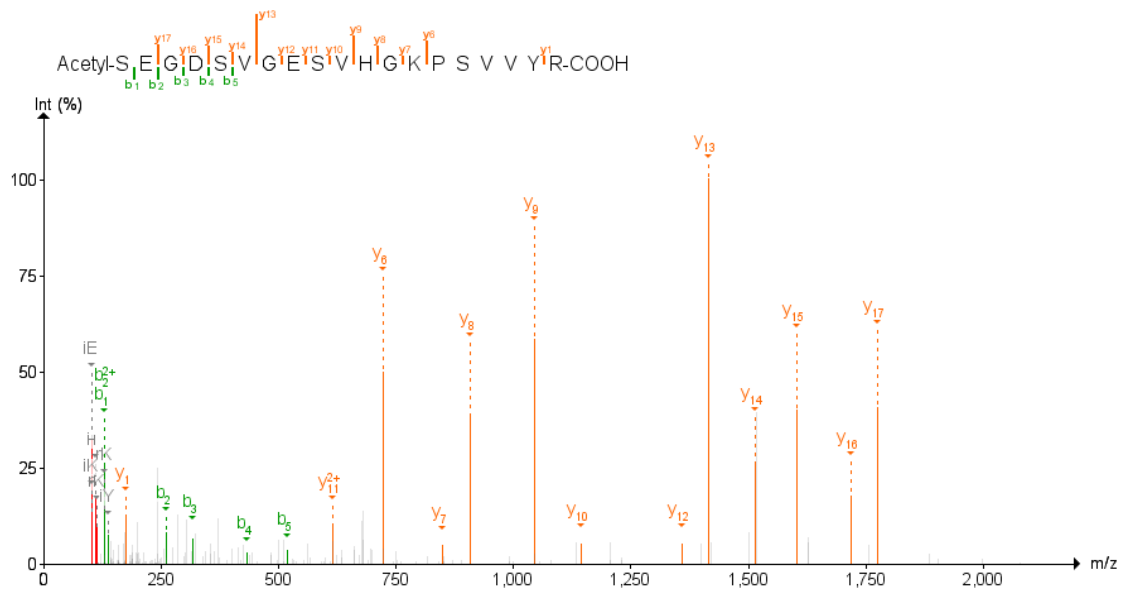

Figure 80: RER1 Second experiment

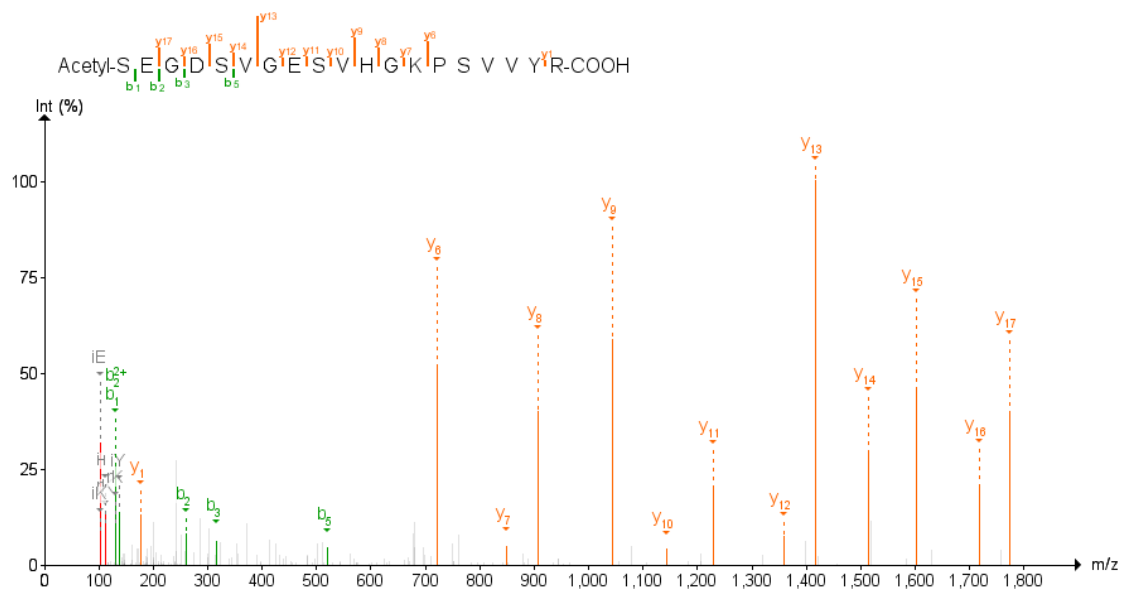

Figure 81: RER1 Third experiment

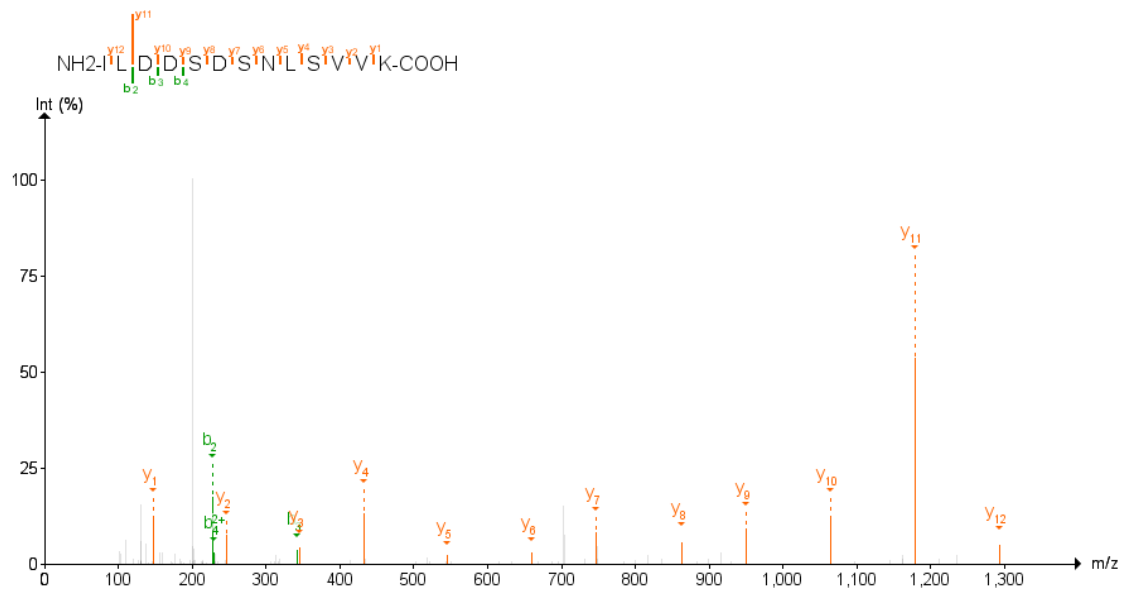

Figure 82: RGPD3;RGPD4 Second experiment

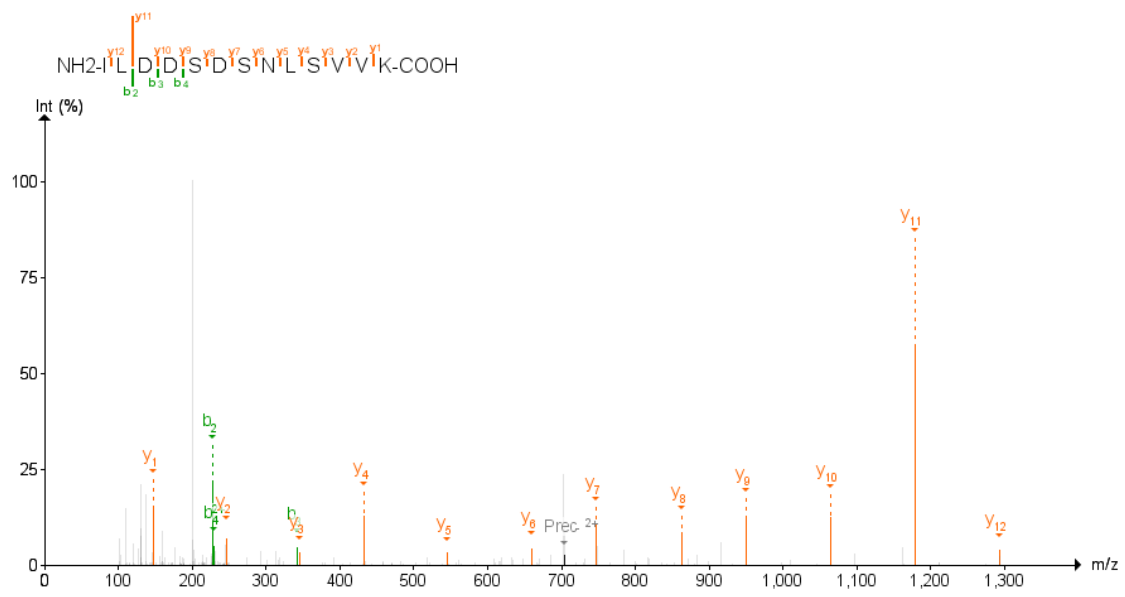

Figure 83: RGD3;RGPD4 Third experiment

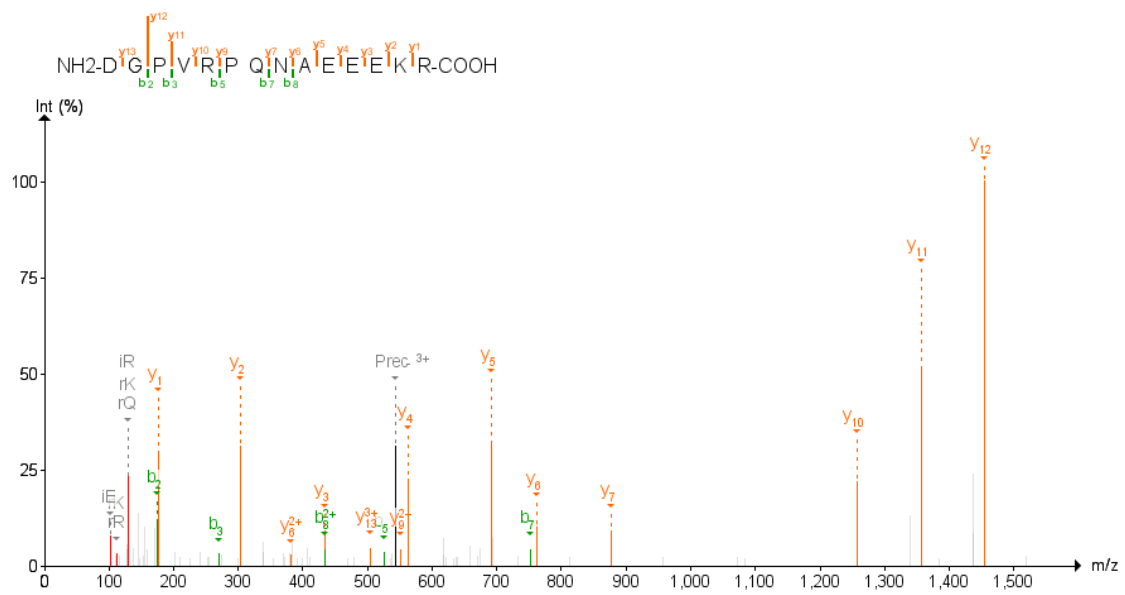

Figure 84: SLC39A7 First experiment

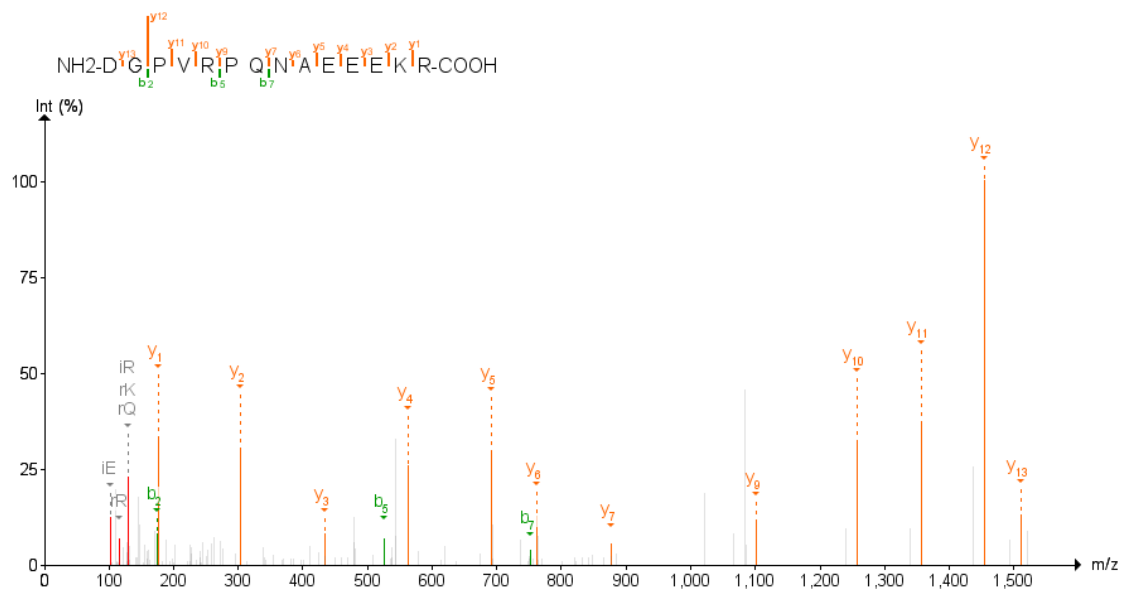

Figure 85: SLC39A7 Second experiment

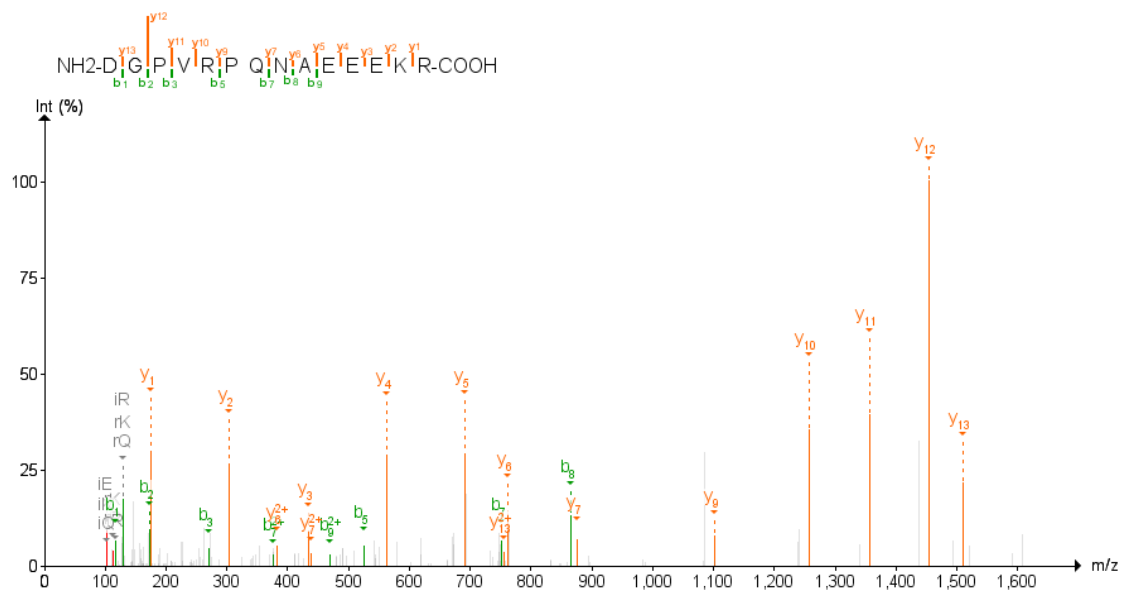

Figure 86: SLC39A7 Third experiment

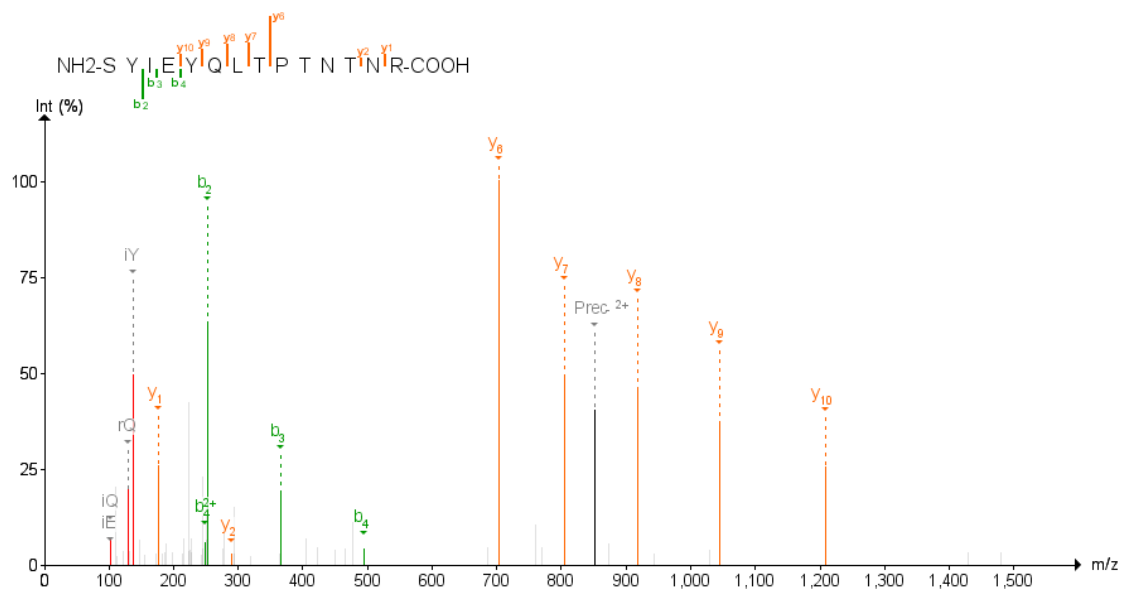

Figure 87: SNX9 First experiment

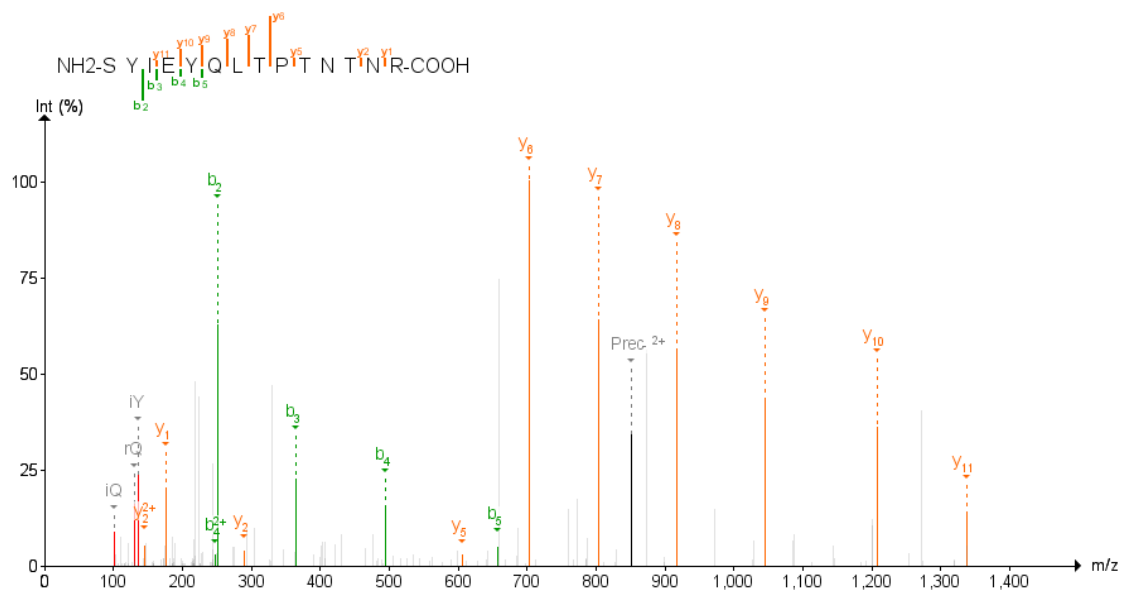

Figure 88: SNX9 Third experiment



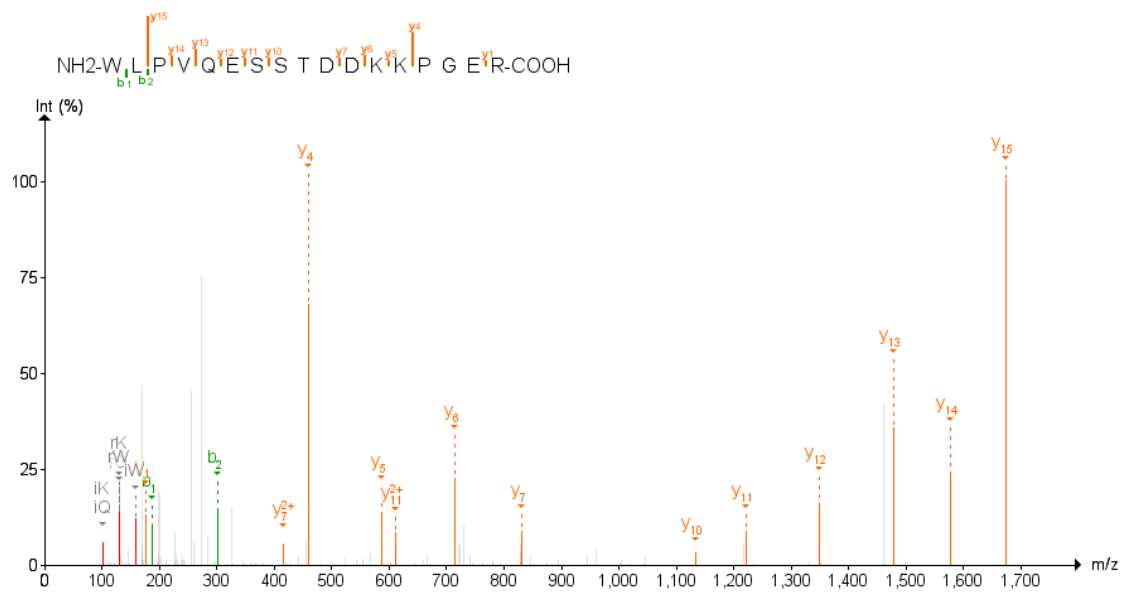

Figure 89: SPCS1 First experiment

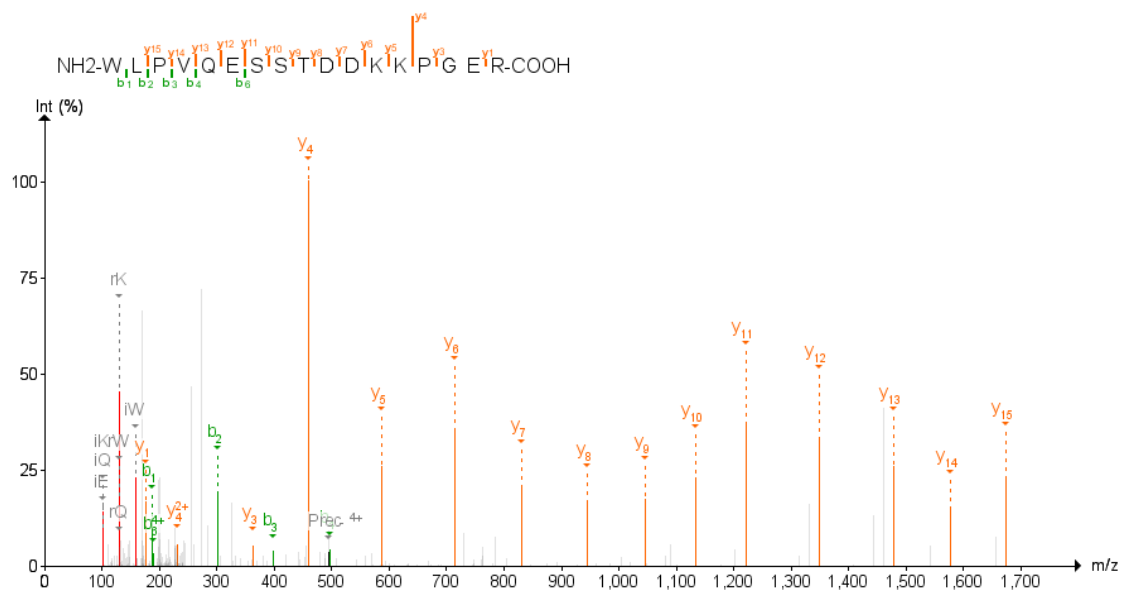

Figure 90: SPCS1 Second experiment

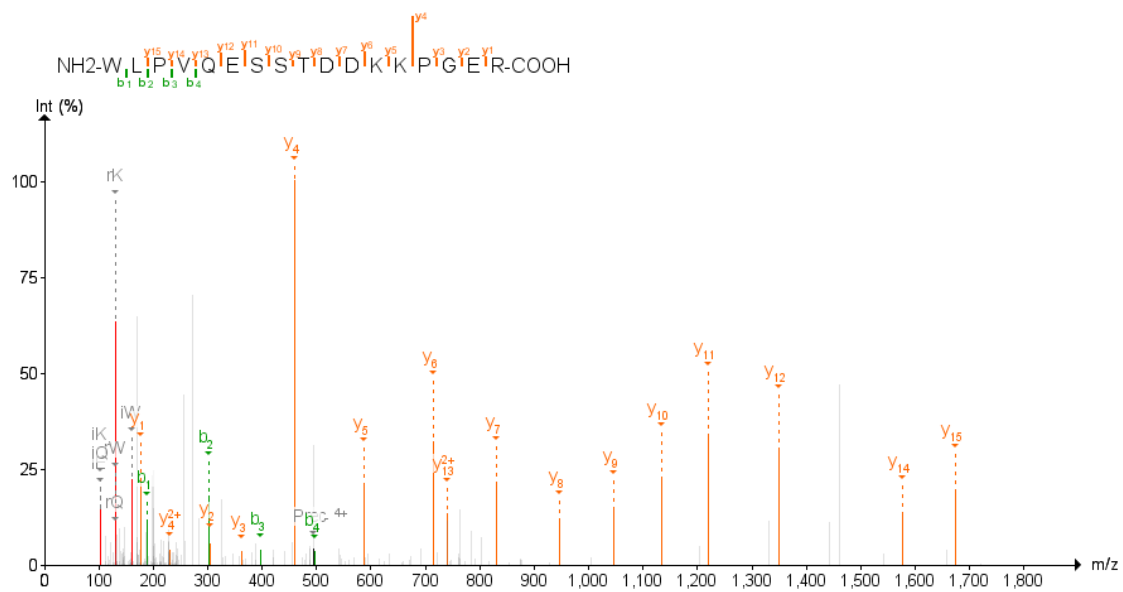

Figure 91: SPCS1 Third experiment

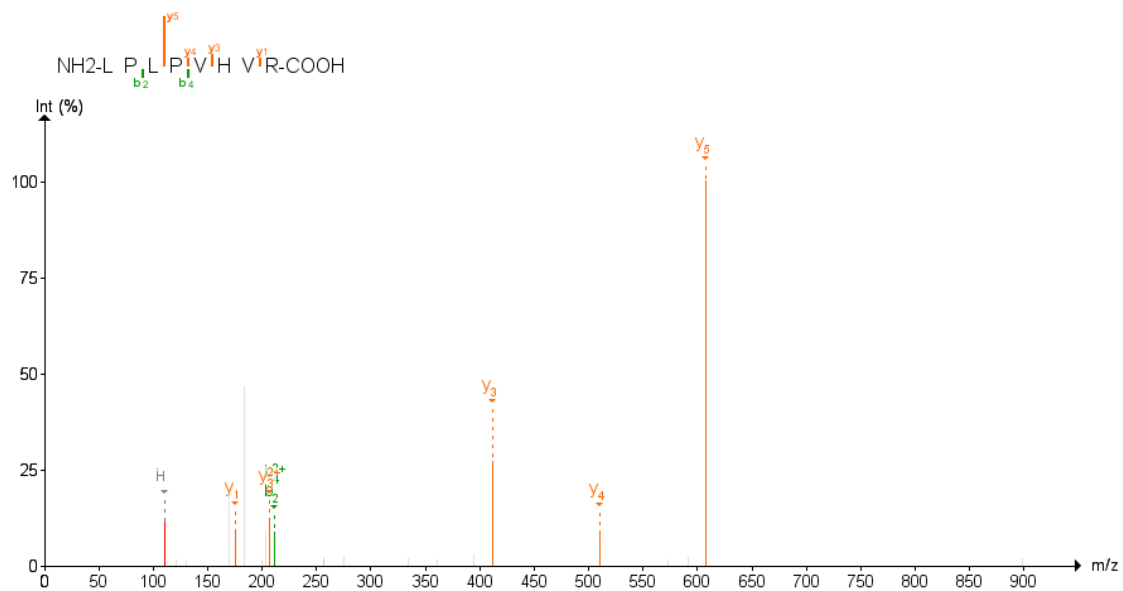

Figure 92: TLCD1 First experiment

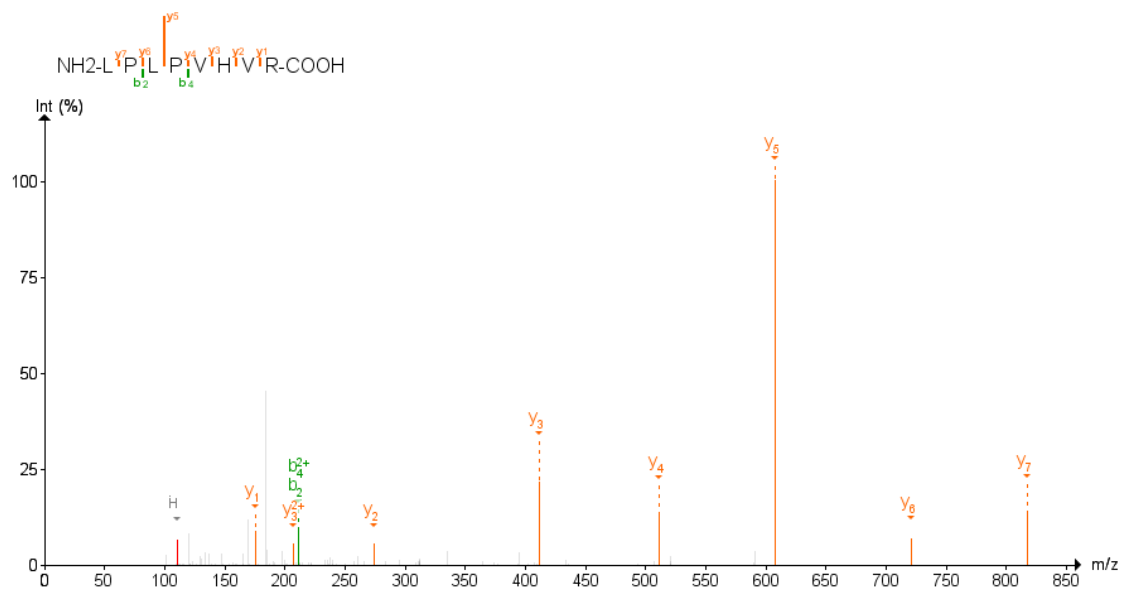

Figure 93: TLCD1 Third experiment

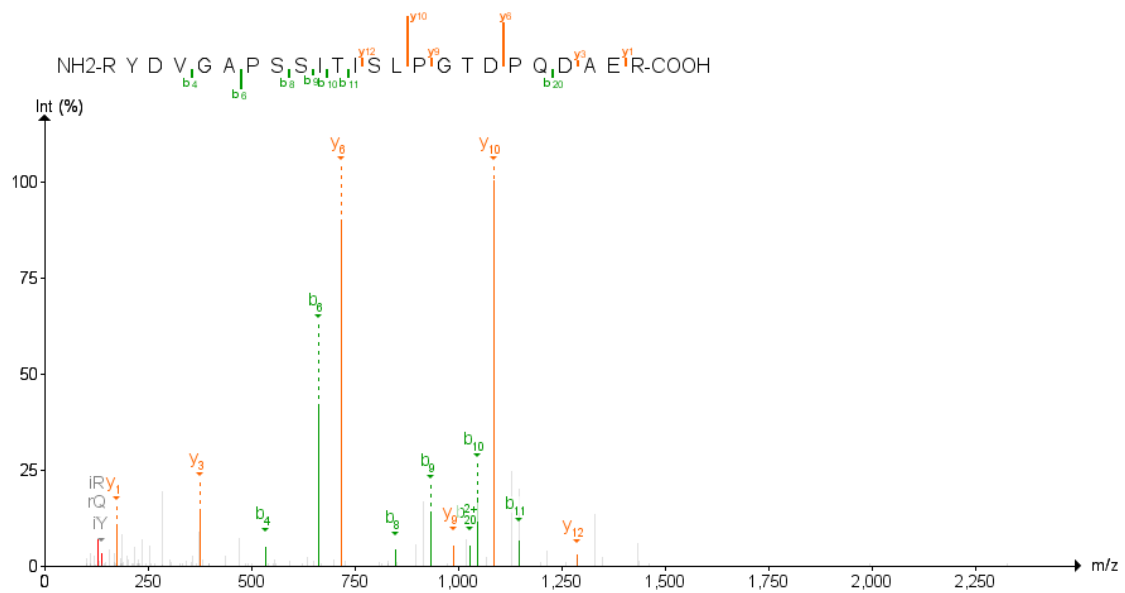

Figure 94: TMEM15 First experiment

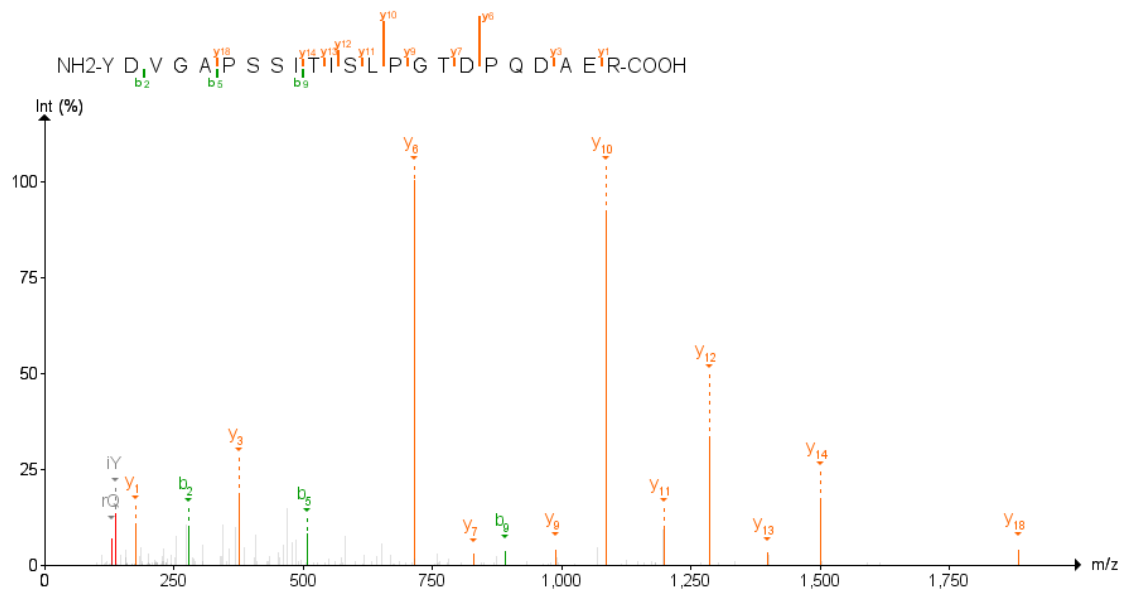

Figure 95: TMEM115 Second experiment

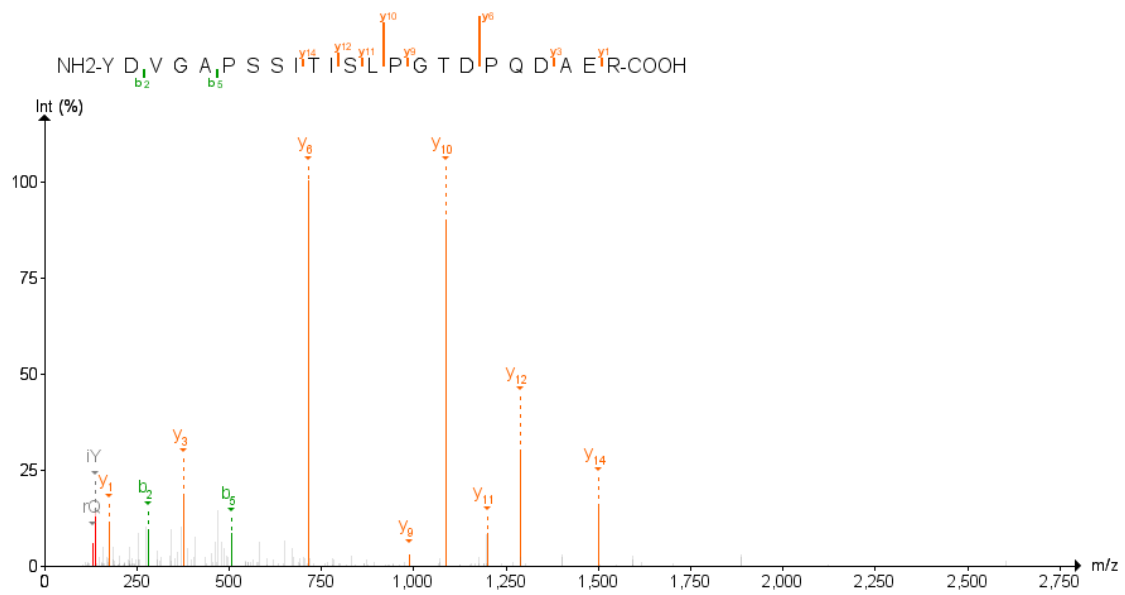

Figure 96: TMEM115 Third experiment

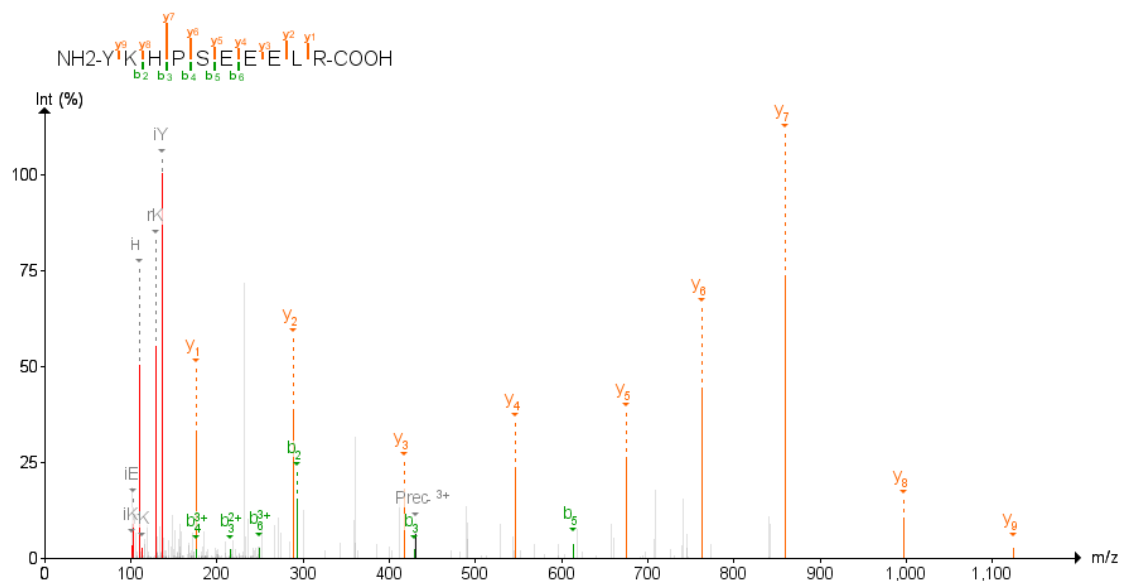

Figure 97: TMEM161A Second experiment

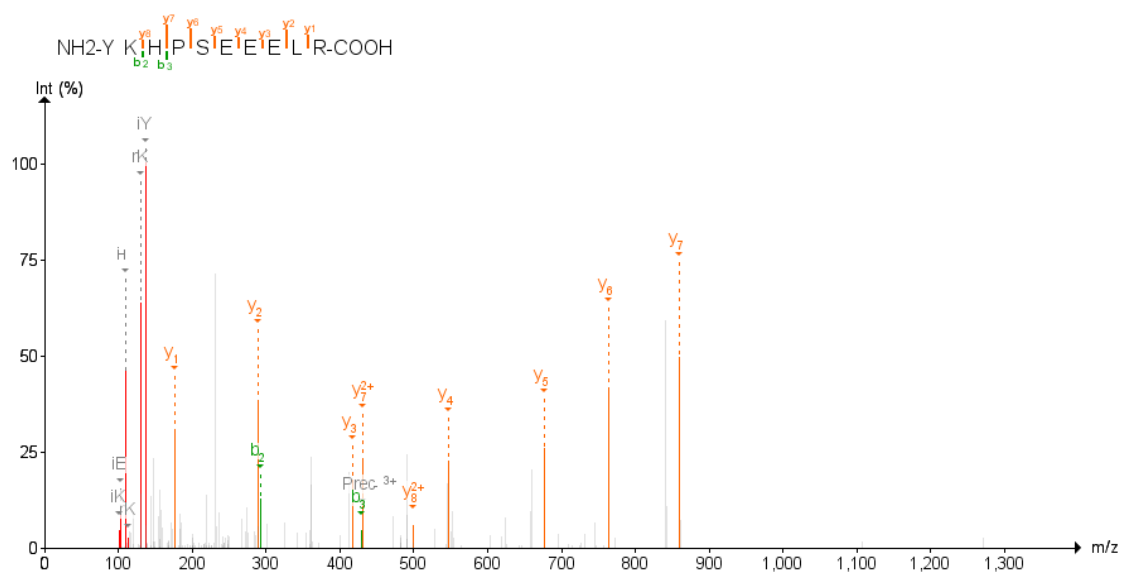

Figure 98: TMEM161A Third experiment

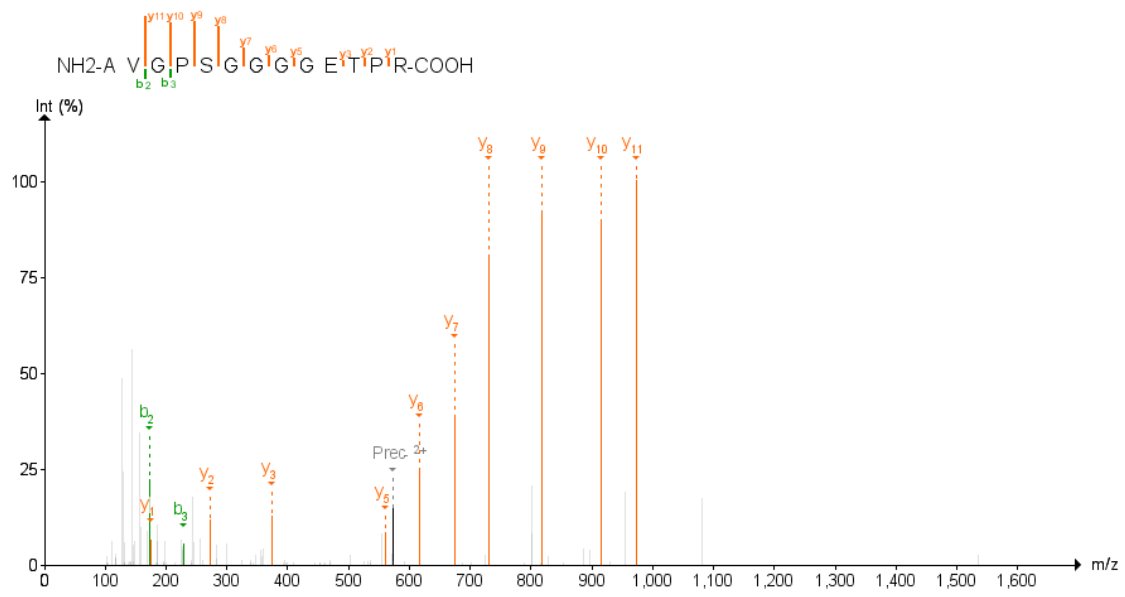

Figure 99: TMEM245 Second experiment

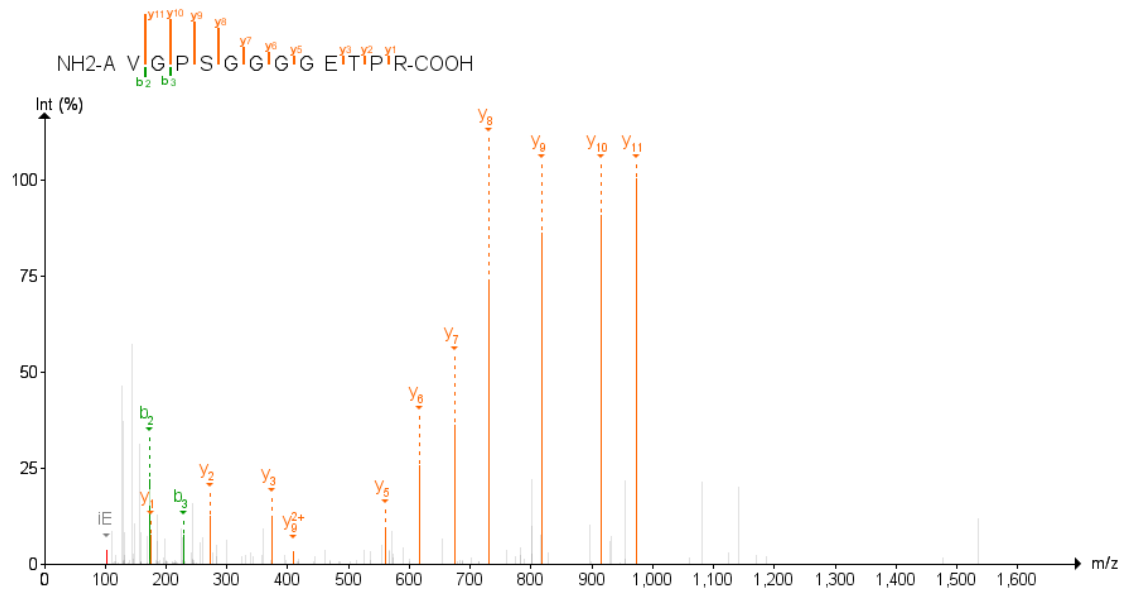

Figure 100: TMEM245 Third experiment

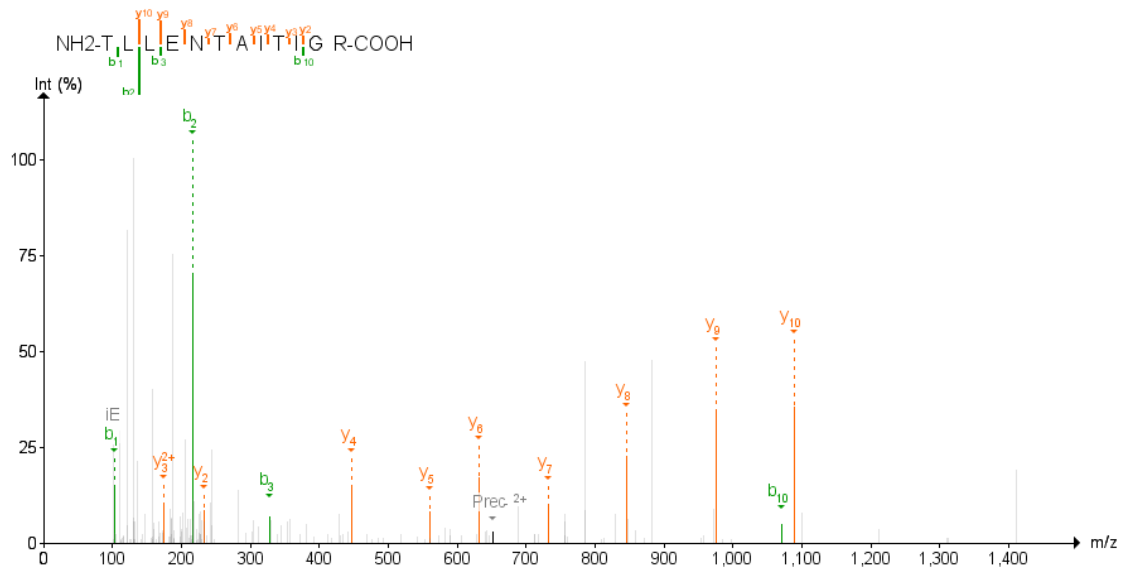

Figure 101: TNPO1 First experiment

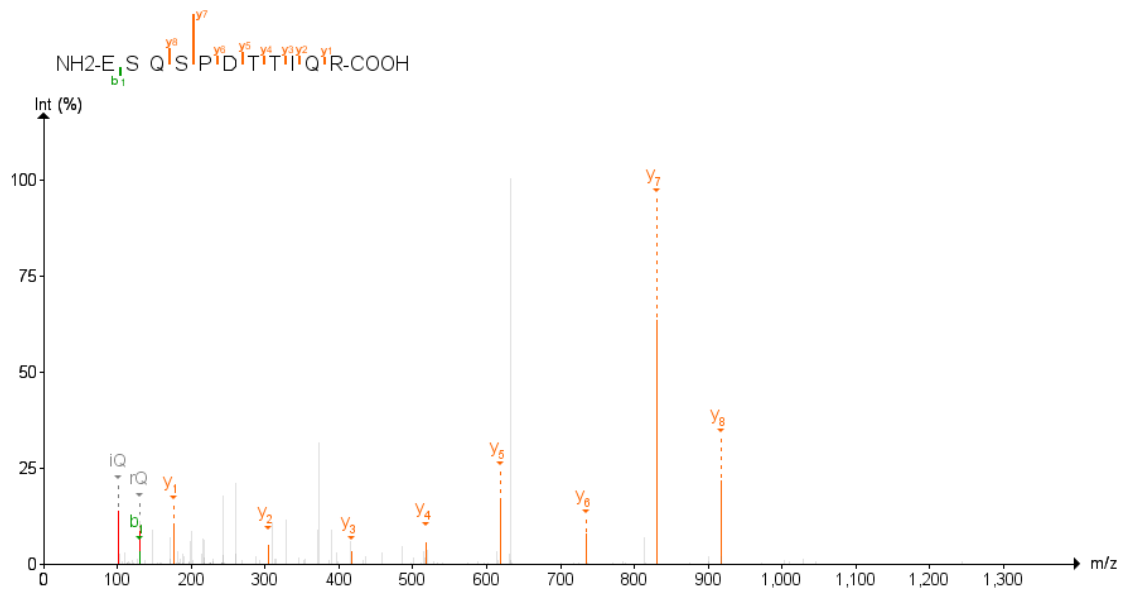

Figure 102: TNPO1 Second experiment

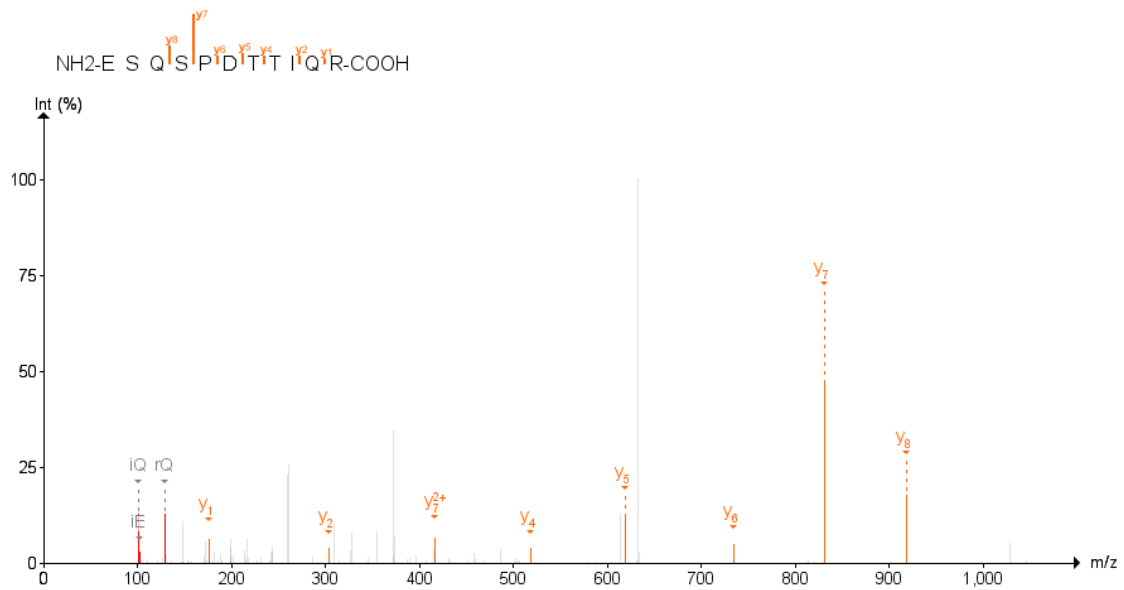

Figure 103: TNPO1 Third experiment

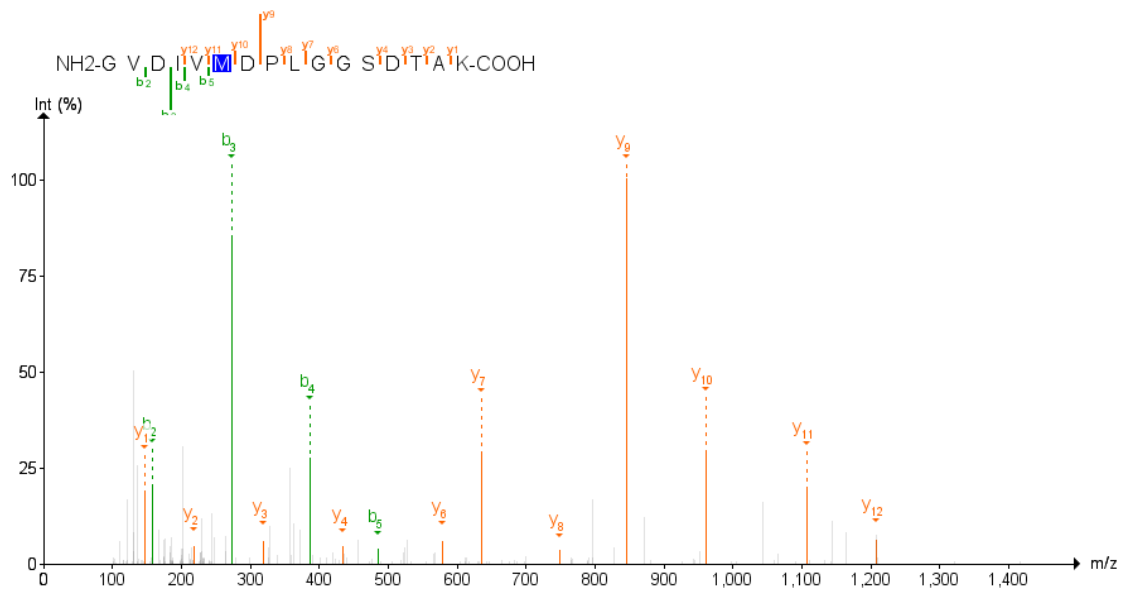

Figure 104: VAT1 Second experiment



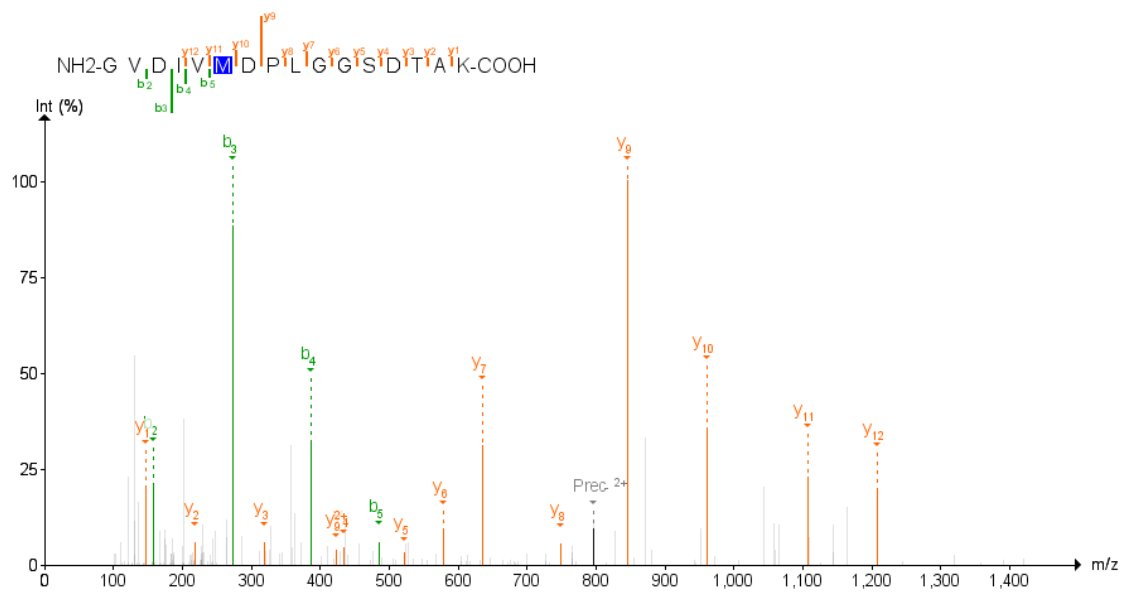

Figure 105: VAT1 Third experiment
